# Supplementary material for: Structure/affinity studies in the bicyclo-DNA series: Synthesis and properties of oligonucleotides containing bcen-T and iso-tricyclo-T nucleosides
Source: PubMed Central journal article supplement (PMC4142851; doi:10.3762/bjoc.10.194), 2014-08-12
Supplement: Beilstein_J_Org_Chem-10-1840-s001.pdf [file Beilstein_J_Org_Chem-10-1840-s001.pdf]

# Supporting Information

for

## Structure/affinity studies in the bicyclo-DNA series: Synthesis and properties of oligonucleotides containing bc<sup>en</sup>-T and iso-tricyclo-T nucleosides

Branislav Dugovic, Michael Wagner and Christian J. Leumann\*

Address: Department of Chemistry and Biochemistry, University of Bern, Freiestrasse 3, CH-3012 Bern, Switzerland

Email: Christian J. Leumann - [christian.leumann@dcb.unibe.ch](mailto:christian.leumann@dcb.unibe.ch)

\*Corresponding author

### Experimental part

|               |                                                                                                                                                               |
|---------------|---------------------------------------------------------------------------------------------------------------------------------------------------------------|
| Pages S2–S27  | Data on synthesis of compounds <b>1–13</b><br><b>Figures S1–S16:</b> <sup>1</sup> H, <sup>13</sup> C and <sup>31</sup> P NMR spectra of compounds <b>1–13</b> |
| Page S28      | Crystal structure determination - General                                                                                                                     |
| Page S29      | <b>Figure S17:</b> ORTEP view of compound <b>8</b>                                                                                                            |
| Pages S29–S36 | <b>Tables S1–S9:</b> Crystal structure data of compound <b>8</b>                                                                                              |
| Page S37      | <b>Figure S18:</b> ORTEP view of compound <b>11β</b>                                                                                                          |
| Pages S37–S43 | <b>Tables S10–S18:</b> Crystal structure data of compound <b>11β</b>                                                                                          |
| Page S44      | <b>Figure S19:</b> ORTEP view of compound <b>tc-T</b>                                                                                                         |
| Pages S44–S51 | <b>Tables S19–S22:</b> Crystal structure data of compound <b>tc-T</b>                                                                                         |
| Page S52      | General procedures for synthesis, deprotection and purification of <b>ON1–7</b>                                                                               |
| Page S53      | <b>Table S23:</b> ESI-M and HPLC characterization of <b>ON1–7</b>                                                                                             |
| Page S54–S57  | Scans of ESI <sup>-</sup> -MS of oligonucleotides <b>ON1–4</b>                                                                                                |

**(2*S*,3*aR*,6*R*,6*aR*)-2-methoxy-3,3*a*,6,6*a*-tetrahydro-2*H*-cyclopenta[*b*]furan-3*a*,6-diol (2).** The solution ketone **1** (1.15 g, 6.76 mmol) in MeOH (68 mL) and CeCl<sub>3</sub>·7H<sub>2</sub>O (2.52 g, 6.76 mmol) was stirred at ambient temperature for 30 min. It was cooled down to -78°C and NaBH<sub>4</sub> (0.26 g, 6.76 mmol) was added during 20 min in three equal portions. Resulting mixture was stirred for 1.5 h at the same temperature. Then the cooling bath was removed, stirring continued for 30 min at RT and afterwards the solvent was evaporated. Residue was purified by CC (3 % MeOH in CH<sub>2</sub>Cl<sub>2</sub>) to provide 0.85 g (73%, colourless oil) of **2** and 0.11 g (9%, white solid) of **epi-2**.

*data for 2:* R<sub>f</sub> (6% MeOH in CH<sub>2</sub>Cl<sub>2</sub>) = 0.28; <sup>1</sup>H NMR (CD<sub>3</sub>OD, 300 MHz): δ = 5.82 (ddd, *J* = 5.7, 1.7, 0.6 Hz, 1H), 5.74 (ddd, *J* = 5.7, 1.8, 0.8 Hz, 1H; H-C(4,5)), 5.11 (dd, *J* = 5.4, 2.3 Hz, 1H; H-C(2)), 4.80 (dt, *J* = 5.7, 1.8 Hz, 1H; H-C(6)), 4.24 (d, *J* = 5.5 Hz, 1H; H-C(6*a*)), 3.39 (s, 3H; OCH<sub>3</sub>), 2.28 (dd, *J* = 13.8, 5.4 Hz, 1H; H-C(3)), 2.10 (dd, *J* = 13.8, 2.3 Hz, 1H; H-C(3)) ppm; <sup>13</sup>C NMR (CD<sub>3</sub>OD, 75 MHz): δ = 137.2, 136.0 (2×d, C(4,5)), 108.7 (d, C(2)), 91.7 (s, C(3*a*)), 86.3 (d, C(6*a*)), 76.1 (d, C(6)), 55.4 (q, OCH<sub>3</sub>), 47.7 (t, C(3)) ppm; ESI<sup>+</sup>-HRMS: calcd for C<sub>8</sub>H<sub>12</sub>NaO<sub>4</sub>: 195.0628 [*M*+Na]<sup>+</sup>; found: 195.0629.

*data for epi-2:* R<sub>f</sub> (6% MeOH in CH<sub>2</sub>Cl<sub>2</sub>) = 0.19; <sup>1</sup>H NMR (CD<sub>3</sub>OD, 300 MHz): δ = 5.91 (dt, *J* = 5.6, 0.9 Hz, 1H), 5.72 (ddd, *J* = 5.6, 2.2, 1.1 Hz, 1H; H-C(4,5)), 5.04 (dd, *J* = 4.3, 2.1 Hz, 1H; H-C(2)), 4.41 (dt, *J* = 2.0, 0.9 Hz, 1H; H-C(6)), 4.21-4.20 (m, 1H; H-C(6*a*)), 3.36 (s, 3H; OCH<sub>3</sub>), 2.16-2.01 (m, 2H; H-C(3)) ppm; <sup>13</sup>C NMR (CD<sub>3</sub>OD, 75 MHz): δ = 139.4, 133.5 (2×d, C(4,5)), 108.3 (d, C(2)), 97.2 (d, C(6*a*)), 91.3 (s, C(3*a*)), 81.2 (d, C(6)), 55.1 (q, OCH<sub>3</sub>), 46.1 (t, C(3)) ppm; ESI<sup>+</sup>-HRMS: calcd for C<sub>8</sub>H<sub>12</sub>NaO<sub>4</sub>: 195.0628 [*M*+Na]<sup>+</sup>; found: 195.0635.

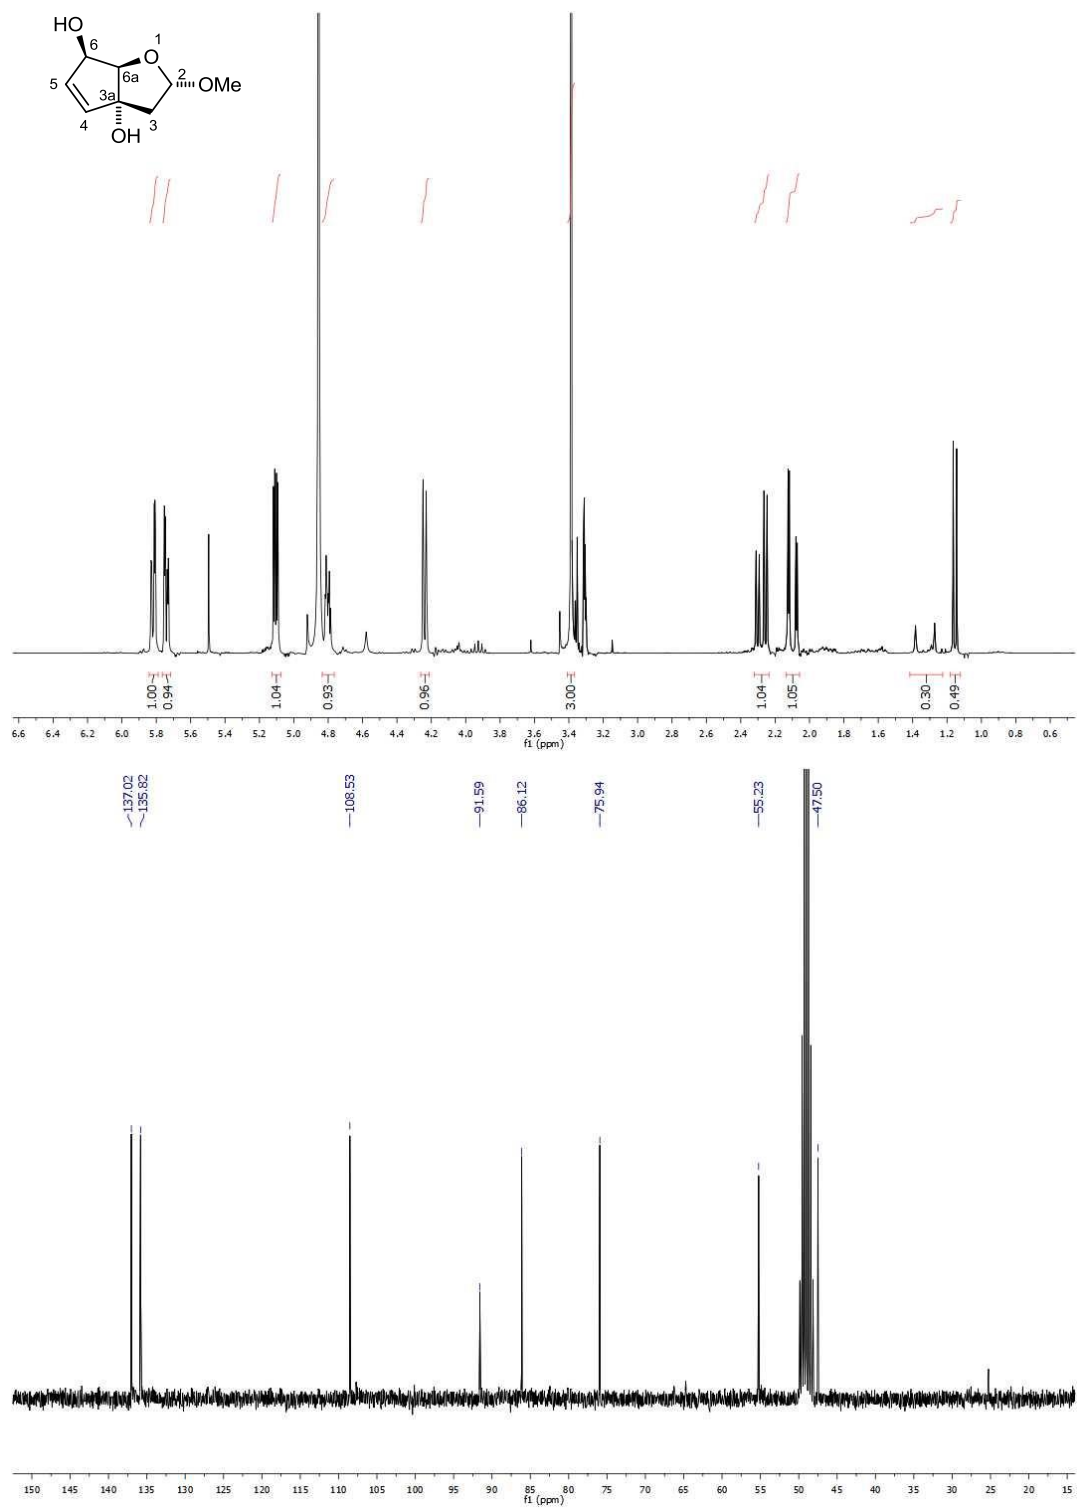

**Figure S1:** <sup>1</sup>H (CD<sub>3</sub>OD, 300 MHz) and <sup>13</sup>C NMR (CD<sub>3</sub>OD, 75 MHz) spectrum of 2

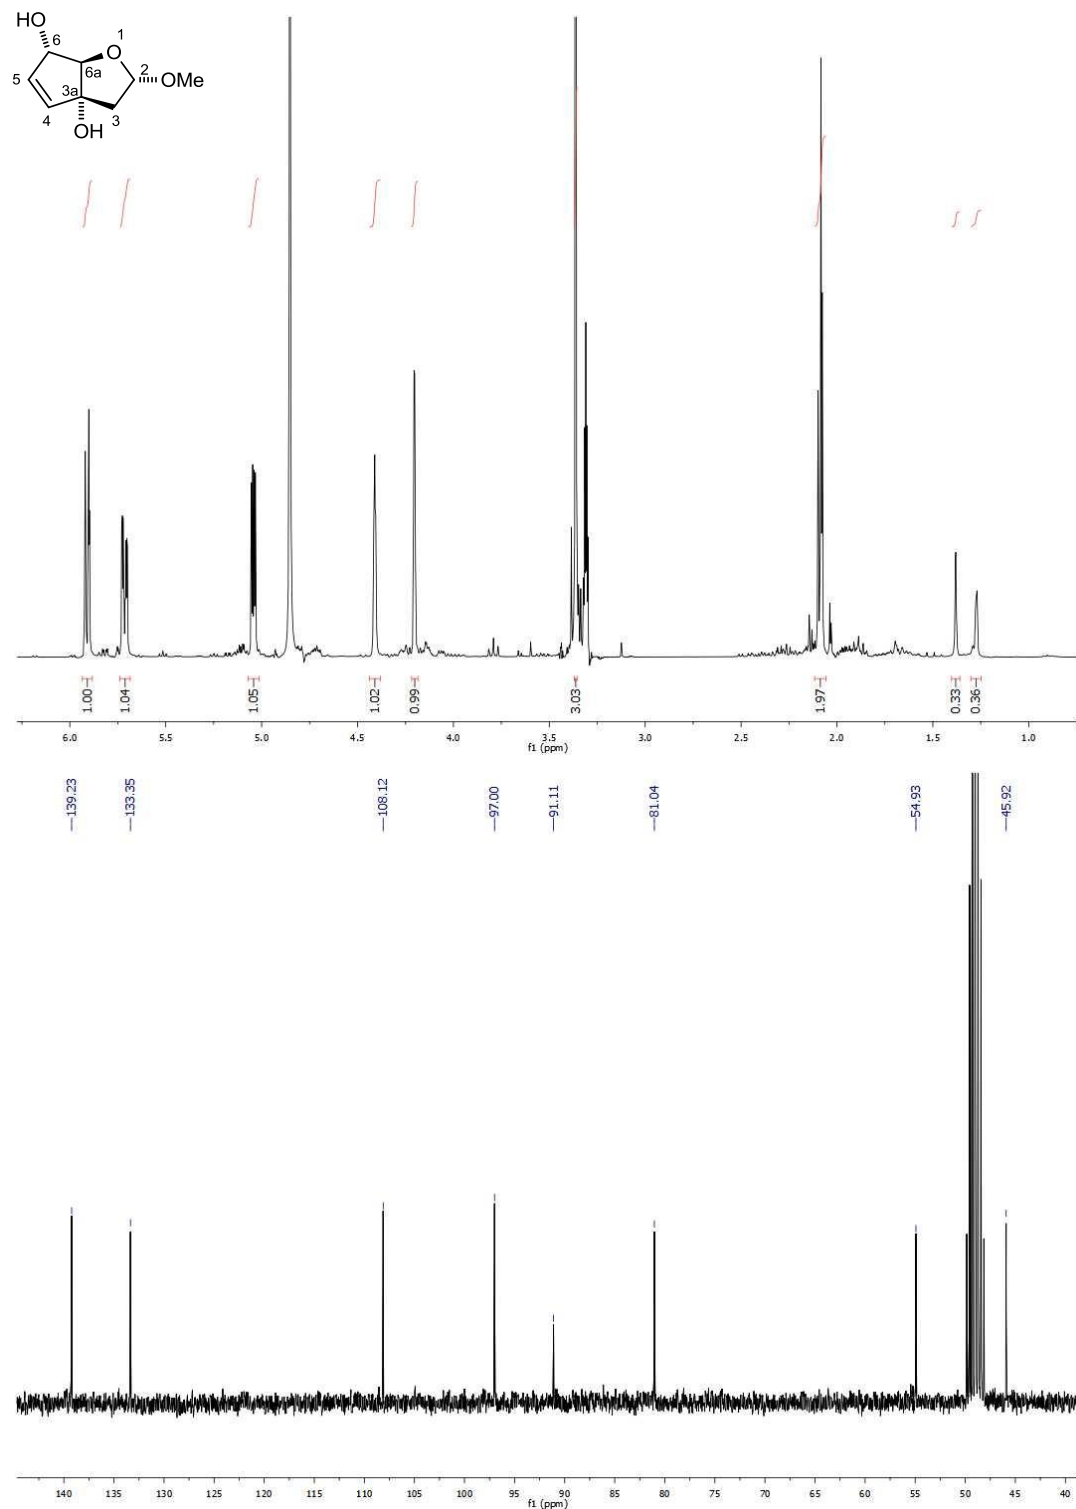

**Figure S2:** <sup>1</sup>H (CD<sub>3</sub>OD, 300 MHz) and <sup>13</sup>C NMR (CD<sub>3</sub>OD, 75 MHz) spectrum of **epi-2**

**(2*S*,3*aR*,6*R*,6*aR*)-6-((*tert*-Butyl)dimethylsilyloxy)-2-methoxy-3,3*a*,6,6*a*-tetrahydro-2*H*-cyclopenta[*b*]furan-3*a*-ol (**3**).** To diol **2** (0.85 g, 4.9 mmol) dissolved in dry CH<sub>2</sub>Cl<sub>2</sub> (50 mL) were successively added imidazole (1 g, 14.8 mmol) and TBDMSCl (1.12 g, 7.4 mmol). The reaction mixture

was stirred under an argon atmosphere at ambient temperature overnight. After addition of 1N HCl (30 mL), the aqueous phase was extracted with CH<sub>2</sub>Cl<sub>2</sub> (3×) and the organic layer was dried with MgSO<sub>4</sub> and evaporated under reduced pressure. The yellowish oil was purified by CC (EtOAc/Hexane 1:1) to afford **3** (1.12 g, 79%) as a yellowish oil.

*data for 3:* R<sub>f</sub> (3.5% MeOH in CH<sub>2</sub>Cl<sub>2</sub>) = 0.53; <sup>1</sup>H NMR (400 MHz, CDCl<sub>3</sub>) δ = 5.87 (dd, 1H, *J* = 5.8, 0.9 Hz), 5.70 (dd, 1H, *J* = 5.9, 2.1 Hz, H-C(4,5)), 5.16 (dd, 1H, *J* = 4.8, 0.9 Hz, H-C(2)), 4.73 (ddd, 1H, *J* = 5.7, 2.2, 0.9 Hz, H-C(6)), 4.23 (d, 1H, *J* = 5.7 Hz, H-C(6a)), 3.37 (s, 3H, OCH<sub>3</sub>), 2.84 (brs, 1H, OH), 2.17 (dd, 1H, *J* = 13.5, 4.8 Hz), 2.06 (dd, 1H, *J* = 13.5, 0.9 Hz, H-C(3)), 0.87 (s, 9H, Si(CH<sub>3</sub>)<sub>3</sub>), 0.07 (s, 6H, Si(CH<sub>3</sub>)<sub>2</sub>) ppm. <sup>13</sup>C NMR (75 MHz, CDCl<sub>3</sub>) δ = 135.6 (d), 134.8 (d, C(4,5)), 108.9 (d, C(2)), 91.1 (s, C(3a)), 88.1 (d, C(6a)), 74.7 (d, C(6)), 54.9 (q, OCH<sub>3</sub>), 46.9 (t, C(3)), , 26.1 (q, Si(CH<sub>3</sub>)<sub>3</sub>), 18.6 (s, Si(CH<sub>3</sub>)<sub>3</sub>), -4.4, -4.8 (2×Si(CH<sub>3</sub>)<sub>2</sub>) ppm. ESI-  
HRMS: calc. for C<sub>14</sub>H<sub>26</sub>NaO<sub>4</sub>Si 309.1498 [M+Na]<sup>+</sup>, found 309.1496.

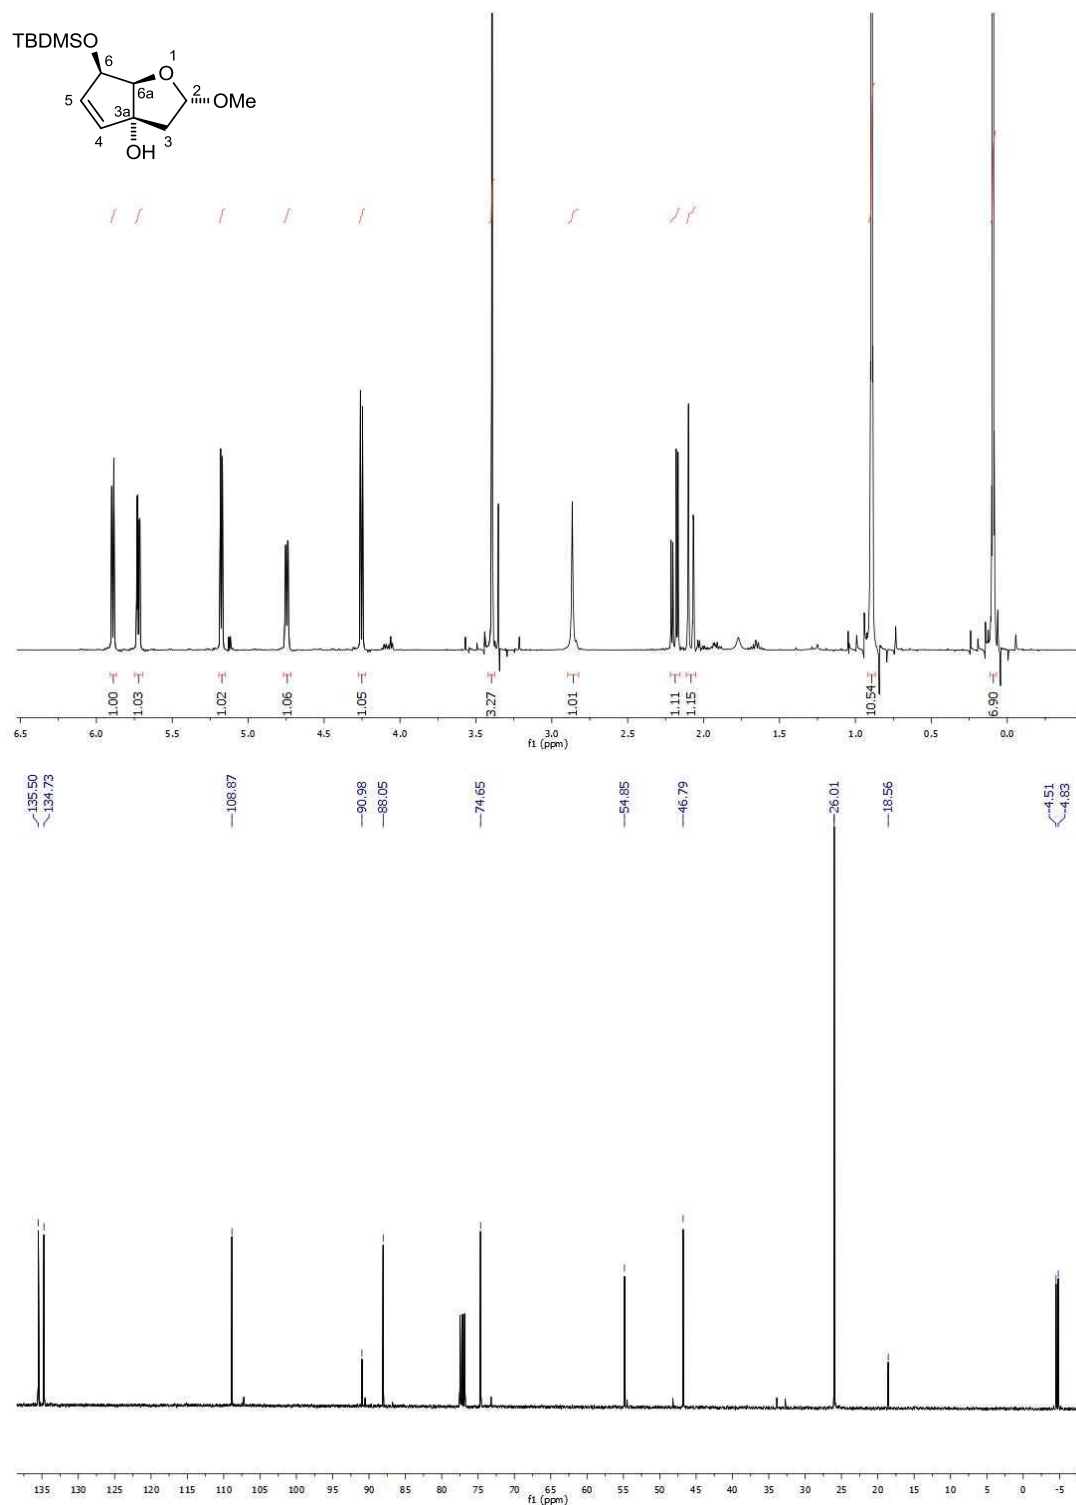

**Figure S3:** <sup>1</sup>H (CDCl<sub>3</sub>, 400 MHz) and <sup>13</sup>C NMR (CDCl<sub>3</sub>, 75 MHz) spectrum of **3**

**(2*S*,3a*R*,3b*R*,4a*S*,5*R*,5a*R*)-5-*tert*-butyldimethylsilyloxy-2-methoxy-octahydro-cyclopropa[3,4]cyclopenta[1,2-*b*]furan-3a-ol (**4**). To alcohol **3** (1.12 g, 3.9 mmol) dissolved in dry CH<sub>2</sub>Cl<sub>2</sub> (39 mL) under an argon atmosphere a solution of Et<sub>2</sub>Zn 1M in hexane (23.4 mL, 23.4 mmol) was added**

dropwise at 0 °C and mixture was stirred at this temperature for 15 min. Afterwards, CH<sub>2</sub>I<sub>2</sub> (3.1 mL, 39.0 mmol) was added, the reaction mixture was allowed to warm to ambient temperature and it was stirred overnight. The reaction was quenched by the addition of NH<sub>4</sub>Cl. After separation of the phases the organic layer was washed with 1N Na<sub>2</sub>S<sub>2</sub>O<sub>3</sub>. The combined aqueous layers were extracted with EtOAc and dried with MgSO<sub>4</sub>. The solvents were evaporated under reduced pressure. The yellowish oil was purified by CC (EtOAc/Hexane 3:7) to afford **4** (1.01 g, 86%) as colourless solid.

*data for 4:* R<sub>f</sub> (EtOAc/Hexane 3:7) = 0.38; <sup>1</sup>H NMR (400 MHz, CDCl<sub>3</sub>) δ = 5.07 (d, 1H, J = 4.9 Hz, H-C(1)), 4.06 (d, 1H, J = 5.2, H-C(5)), 3.92 (d, 1H, J = 5.1, H-C(4)), 3.34 (s, 3H, OCH<sub>3</sub>), 3.23 (brs 1H, OH), 2.30 (dd, 1H, J = 13.1, 4.9, H-C(2)), 2.03 (d, 1H, J = 13.1, H-C(2)), 1.65 (ddd, 1H, J = 7.9, 5.9, 3.7, H-C(7)), 1.38 (ddd, 1H, J = 8.7, 5.8, 4.5, H-C(6)), 0.87 (s, 9H, C(CH<sub>3</sub>)<sub>3</sub>), 0.63-0.57 (m, 1H, H-C(8)), 0.49-0.46 (m, 1H, H-C(8)), 0.05, 0.03(2xs, 2x3H, Si(CH<sub>3</sub>)<sub>2</sub>) ppm. <sup>13</sup>C NMR (75 MHz, CDCl<sub>3</sub>) δ = 108.9 (d, C(1)), 90.0 (d, C(4)), 88.4 (s, C(3)), 71.9 (d, C(5)), 55.0 (q, OCH<sub>3</sub>), 45.2 (t, C(2)), 26.1 (q, SiC(CH<sub>3</sub>)<sub>3</sub>), 23.9 (d, C(6)), 22.8 (d, C(7)), 18.4 (s, SiC(CH<sub>3</sub>)<sub>3</sub>), 7.8 (t, C(8)), -4.4, -5.0 (q, Si(CH<sub>3</sub>)<sub>2</sub>) ppm. ESI-HRMS: calc. for C<sub>15</sub>H<sub>28</sub>NaO<sub>4</sub>Si 323.1655 [M+Na]<sup>+</sup>, found 323.1649.

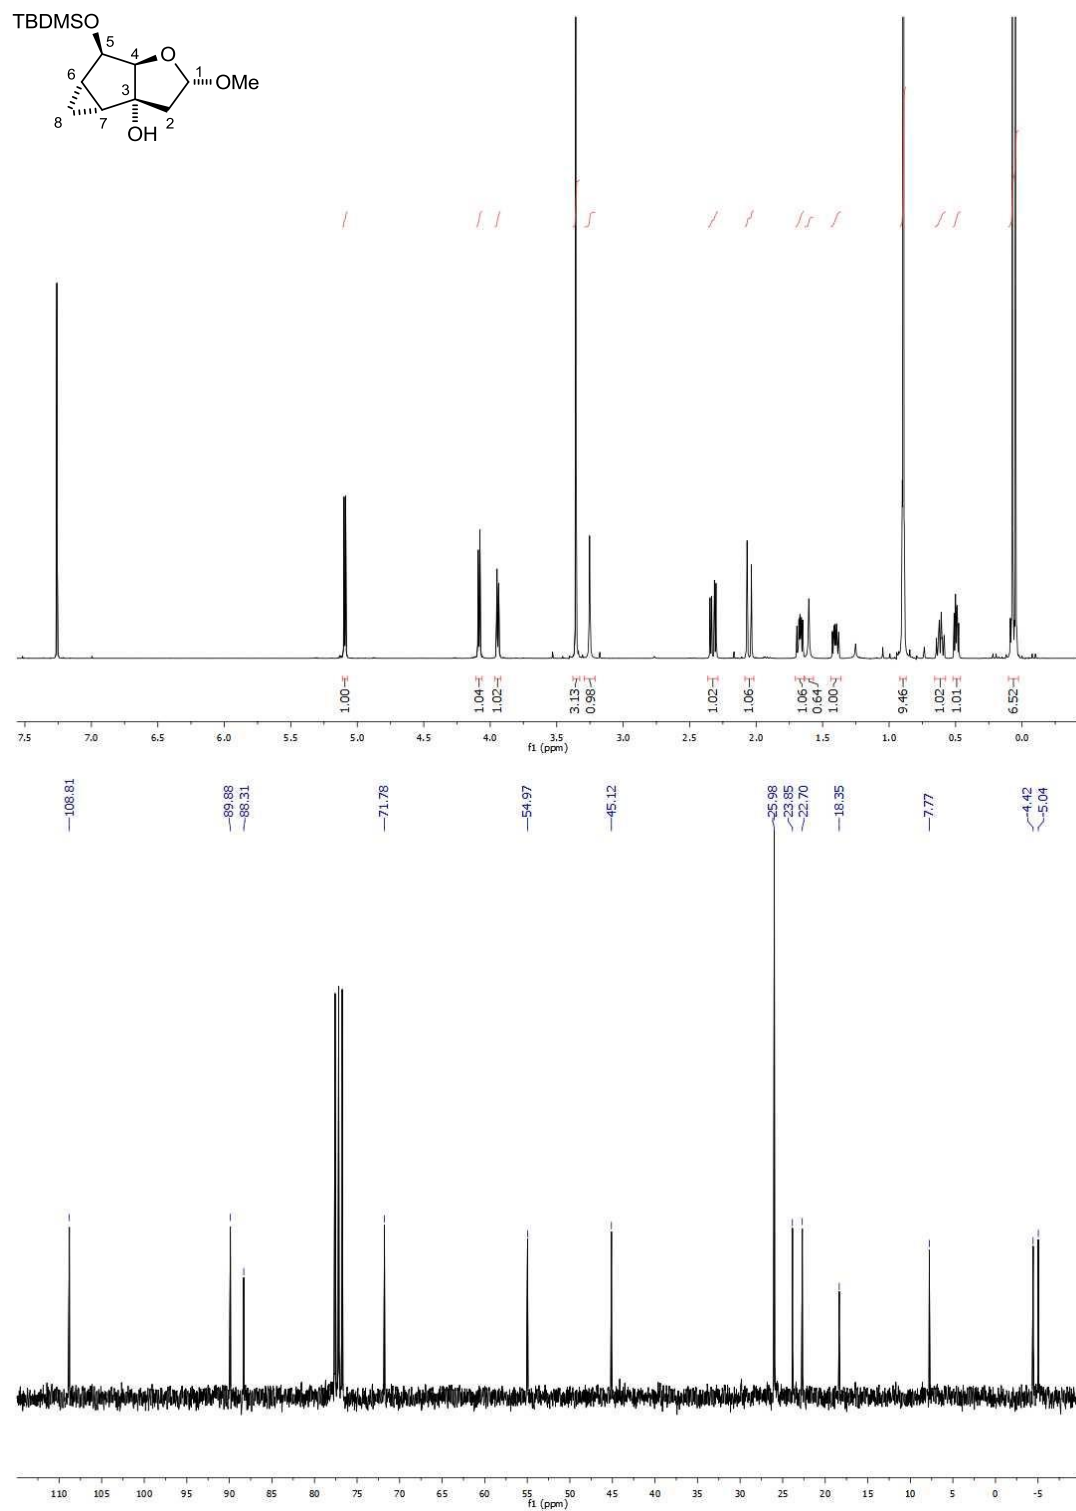

**Figure S4:** <sup>1</sup>H (CDCl<sub>3</sub>, 400 MHz) and <sup>13</sup>C NMR (CDCl<sub>3</sub>, 75 MHz) spectrum of **4**

**(2*S*,3*aR*,3*bR*,4*aS*,5*R*,5*aR*)-5-{{*tert*-Butyldimethylsilyl}oxy}-2-methoxy octahydro cyclopropa[3,4]cyclopenta[1,2-*b*]furan-3*a*-yl pivalate (**5**). To mixture of the alcohol **4** (0.37 g, 1.23 mmol) and DMAP (0.90 g, 7.39 mmol) in pyridine (1 mL) and 1,2-dichloroethane (15 mL) cooled in an ice**



bath to 0 °C was added PivCl (0.9 mL, 7.39 mmol). After 10 min the ice bath was removed and the reaction mixture was heated at 70 °C overnight. The mixture was poured into sat. aq. NaHCO<sub>3</sub> and extracted with CH<sub>2</sub>Cl<sub>2</sub> (3×). The organic layer was dried with MgSO<sub>4</sub>, solvents were removed *in vacuo*. Purification by CC (EtOAc/Hexane 1:9) afforded title compound **19** (0.5 g, quant.) as a colourless oil.

*data for 5:* R<sub>f</sub> (EtOAc/Hex 1:1) = 0.8; <sup>1</sup>H NMR (400 MHz, CDCl<sub>3</sub>) δ = 5.14 (dd, 1H, *J* = 5.8, 1.0 Hz, H-C(1)), 4.19 (d, 1H, *J* = 5.2 Hz, H-C(5)), 4.03 (d, 1H, *J* = 5.2 Hz, H-C(4)), 3.27 (s, 3H, OCH<sub>3</sub>), 2.47 (d, 1H, *J* = 14.6 Hz, H-C(2)), 2.36 (dd, 1H, *J* = 14.6, 5.9 Hz, H-C(2)), 2.26 (ddd, 1H, *J* = 8.1, 6.0, 3.7 Hz, H-C(6/7)), 1.45 (ddd, 1H, *J* = 8.7, 5.8, 4.6 Hz, H-C(6/7)), 1.16 (s, 9H, COC(CH<sub>3</sub>)<sub>3</sub>), 0.89 (s, 9H, SiC(CH<sub>3</sub>)<sub>3</sub>), 0.56-0.50 (m, 1H, H-C(8)), 0.26 (ddd, 1H, *J* = 5.9, 4.5, 3.9 Hz, H-C(8)), 0.07, 0.06 (s, 2×3H, Si(CH<sub>3</sub>)<sub>2</sub>), ppm. <sup>13</sup>C NMR (75 MHz, CDCl<sub>3</sub>) δ = 178.5 (s, COC(CH<sub>3</sub>)<sub>3</sub>), 109.1 (d, C(1)), 94.3 (s, C(3)), 89.1 (d, C(4)), 71.2 (d, C(5)), 54.9 (q, OCH<sub>3</sub>), 42.4 (t, C(2)), 39.1 (s, COC(CH<sub>3</sub>)<sub>3</sub>), 27.2 (q, COC(CH<sub>3</sub>)<sub>3</sub>), 26.1 (q, SiC(CH<sub>3</sub>)<sub>3</sub>), 25.5 (d, C(6/7)), 22.9 (d, C(6/7)), 18.5 (s, SiC(CH<sub>3</sub>)<sub>3</sub>), 7.9 (t, C(8)), -4.3, -5.0 (q, Si(CH<sub>3</sub>)<sub>2</sub>) ppm. ESI-HRMS: calc. for C<sub>20</sub>H<sub>36</sub>NaO<sub>5</sub>Si 407.2230 [M+Na]<sup>+</sup>, found 407.2224.

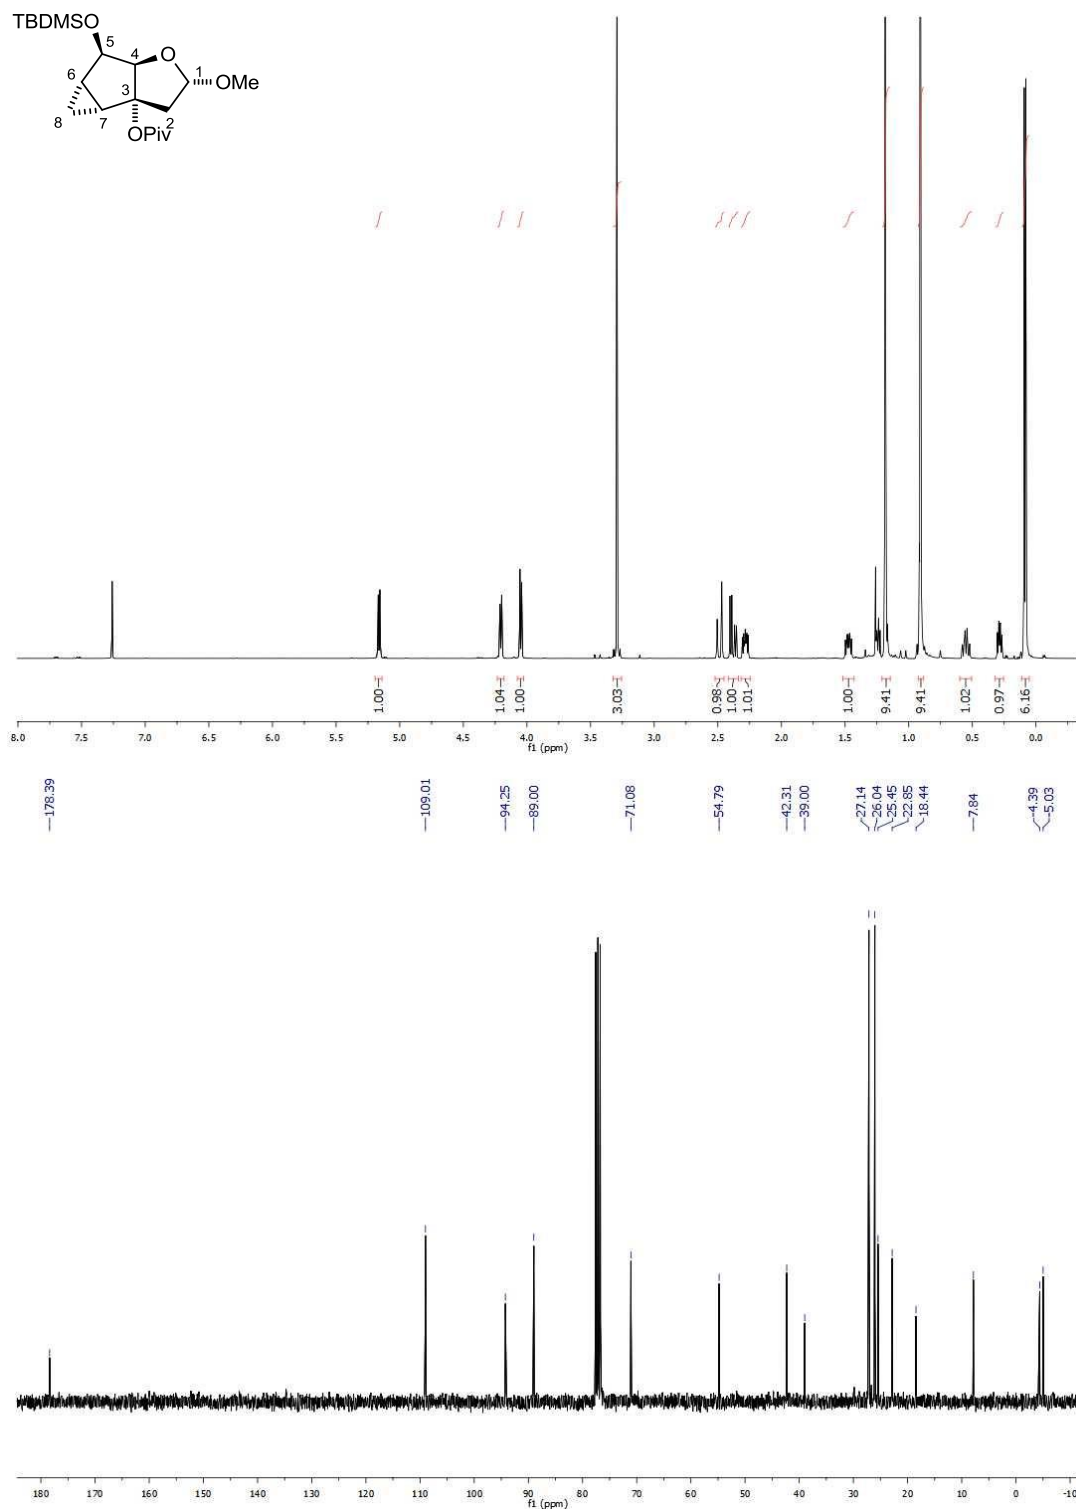

**Figure S5:** <sup>1</sup>H (CDCl<sub>3</sub>, 400 MHz) and <sup>13</sup>C NMR (CDCl<sub>3</sub>, 75 MHz) spectrum of 5

**(2*S*,3*aR*,3*bR*,4*aS*,5*R*,5*aR*)-5-Hydroxy-2-methoxy octahydro cyclopropa[3,4]cyclopenta[1,2-*b*]furan-3*a*-yl pivalate (6).** The compound 5 (0.5 g, max 1.23 mmol) was dissolved in dry THF (15 mL). To the solution was added 1M TBAF in THF (1.85 mL, 1.85 mmol) and it was stirred at RT overnight. The reaction was

quenched by adding sat. aq. NaHCO<sub>3</sub> and then extracted with EtOAc (3×) and dried over MgSO<sub>4</sub>. The compound was purified by CC (EtOAc/Hex 1:1) to afford **6** (314 mg, 95 %) as a colourless solid.

*data for 6*: R<sub>f</sub> (EtOAc/Hex 1:1) = 0.51; <sup>1</sup>H NMR (400 MHz, CDCl<sub>3</sub>) δ = 5.20 (d, 1H, *J* = 5.4 Hz, H-C(1)), 4.28 (d, 1H, *J* = 5.3 Hz, H-C(4)), 4.06 (d, 1H, *J* = 5.3 Hz, H-C(5)), 3.30 (s, 3H, OCH<sub>3</sub>), 2.61 (d, 1H, *J* = 14.7 Hz, H-C(2)), 2.54 (d, 1H, *J* = 0.7, OH), 2.30-2.22 (m, 2H, H-C(2), H-C(6/7)), 1.69 (ddd, 1H, *J* = 9.0, 5.1, 5.1, H-C(6/7)), 1.17 (s, 9H, C(CH<sub>3</sub>)<sub>3</sub>), 0.63 (ddd, 1H, *J* = 8.8, 5.8, 5.8 Hz, H-C(8)), 0.26 (ddd, 1H, *J* = 5.8, 4.2, 4.2 Hz, H-C(8)) ppm. <sup>13</sup>C NMR (75 MHz, CDCl<sub>3</sub>) δ = 178.2 (s, COC(CH<sub>3</sub>)<sub>3</sub>), 149.1 (d, C(1)), 95.0 (s, C(3)), 89.1 (d, C(4)), 69.8 (d, C(5)), 55.1 (q, OCH<sub>3</sub>), 42.7 (t, C(2)), 39.0 (s, COC(CH<sub>3</sub>)<sub>3</sub>), 27.2 (q, COC(CH<sub>3</sub>)<sub>3</sub>), 25.4 (d, C(6/7)), 24.1 (d, C(6/7)), 7.5 (t, C(8)) ppm. ESI-HRMS: calc. for C<sub>14</sub>H<sub>22</sub>NaO<sub>5</sub> 293.1365 [M+Na]<sup>+</sup>, found 293.1359.

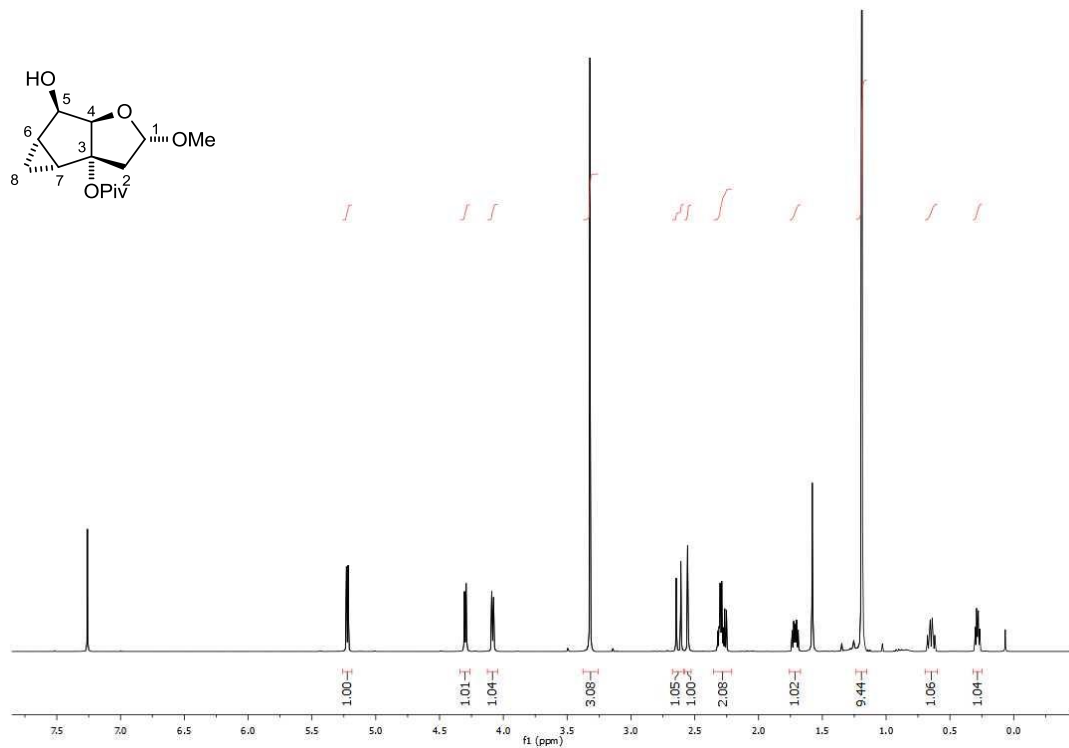

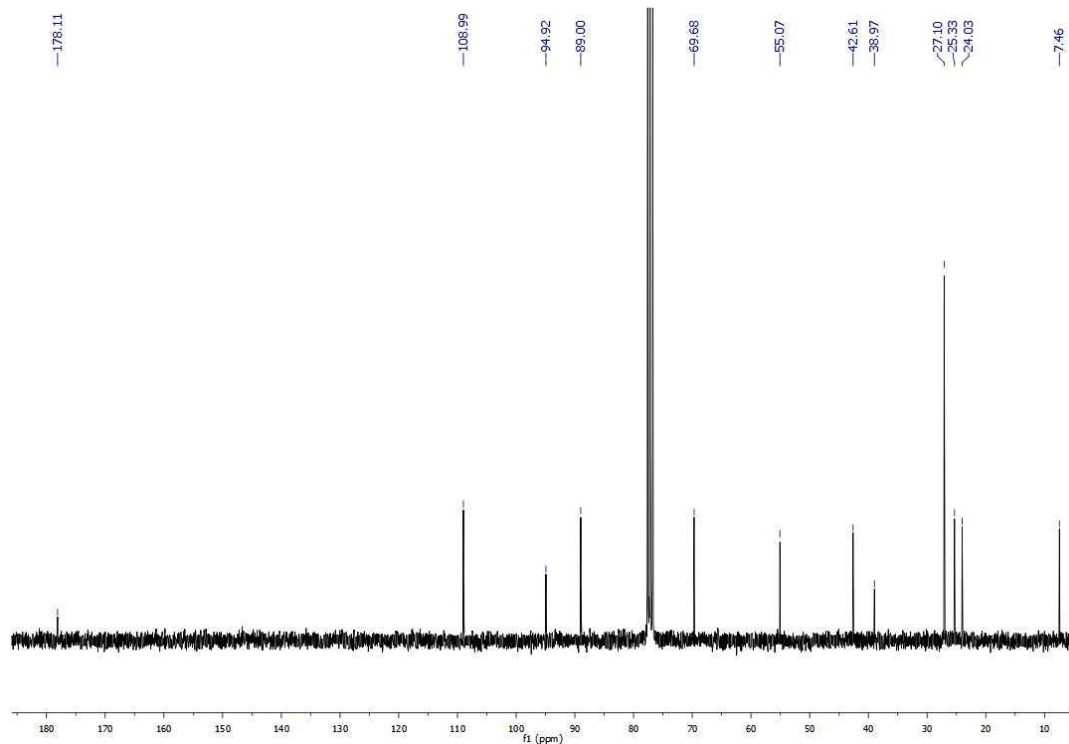

**Figure S6:**  $^1\text{H}$  ( $\text{CDCl}_3$ , 400 MHz) and  $^{13}\text{C}$  NMR ( $\text{CDCl}_3$ , 75 MHz) spectrum of **5**

**(5'R)-1-(3'-Pivaloyl-2'-deoxy-3',5'-ethano-6',7'-methano- $\alpha$ -and- $\beta$ -D-ribofuranosyl)thymine (**7 $\alpha$**  and **7 $\beta$** ).**

The alcohol **6** (0.31 g, 1.15 mmol) and thymine (0.29 g, 2.29 mmol) suspended in dry acetonitrile (12 mL) were treated with BSA (1.4 mL, 5.73 mmol) at 0 °C. After a clear solution had been formed (1 h) the  $\text{SnCl}_4$  (0.54 mL, 4.59 mmol) was added at 0 °C and the reaction was stirred for 17 h while the temperature slowly raised up to RT. The reaction was diluted with EtOAc and poured into satd. aq.  $\text{NaHCO}_3/\text{H}_2\text{O}$  (2:1, 50 mL). The aqueous phase was extracted with EtOAc (4 $\times$ ) and dried over  $\text{MgSO}_4$ . Solvents were removed *in vacuo*, the rest was taken up in  $\text{CH}_2\text{Cl}_2$ , filtered through Celite and concentrated. Purification by CC (2  $\rightarrow$  5% MeOH in  $\text{CH}_2\text{Cl}_2$ ) provided 235 mg (56%) of **7 $\beta$**  and 93 mg (22%) of **7 $\alpha$**  (contaminated by 8% of **7 $\beta$** ) as white foams.

*data for 7 $\alpha$* :  $R_f$  (5 % MeOH in  $\text{CH}_2\text{Cl}_2$ ) = 0.29;  $^1\text{H}$  NMR (300 MHz,  $\text{CD}_3\text{OD}$ )  $\delta$  = 9.47 (brs, 1H, NH), 7.21 (d, 1H,  $J$  = 1.1 Hz, H-C(6)), 6.44 (dd, 1H,  $J$  = 7.9, 1.8 Hz, H-C(1')), 4.46 (d, 1H,  $J$  = 4.9 Hz, H-C(4')), 4.22 (d, 1H,  $J$  = 5.0 Hz, H-C(5')), 3.28 (brs, 1H, OH), 2.95 (dd, 1H,  $J$  = 15.9, 8.0 Hz, H-C(2')), 2.59 (dd, 1H,  $J$  = 15.8, 0.8 Hz, H-C(2')), 2.38 (ddd, 1H,  $J$  = 8.1, 5.9, 3.7 Hz, H-C(7')), 1.86 (d, 3H,  $J$  = 0.7 Hz,  $\text{CH}_3$ ), 1.71 (ddd, 1H,  $J$  = 8.9, 5.2, 5.2 Hz, H-C(6')), 1.15 (s, 9H,  $\text{COC}(\text{CH}_3)_3$ ), 0.72-0.66, 0.34-0.29 (2 $\times$ m, 2 $\times$ 1H, H-C(8')) ppm;  $^{13}\text{C}$  NMR (75 MHz,  $\text{CDCl}_3$ )  $\delta$  = 178.0 (s,  $\text{COC}(\text{CH}_3)_3$ ), 164.1 (s, C(4)), 150.4 (d, C(2)), 135.5 (d, C(6)), 110.6 (d, C(5)), 94.8 (s, C(3')), 91.0, 89.9 (2 $\times$ d, C(5'), C(1')), 70.4 (d, C(4')), 43.5 (t, C(2')), 39.1 (s,  $\text{COC}(\text{CH}_3)_3$ ), 27.1 (q,  $\text{COC}(\text{CH}_3)_3$ ), 23.9, 23.3 (2 $\times$ d, C(6'), C(7')), 12.7 (q,  $\text{CH}_3$ ), 7.8 (t, C(8')) ppm; ESI-HRMS: calc. for  $\text{C}_{18}\text{H}_{25}\text{N}_2\text{O}_6$  365.1713 [ $\text{M}+\text{Na}$ ] $^+$ , found 365.1719.

*data for 7 $\beta$* :  $R_f$  (5 % MeOH in  $\text{CH}_2\text{Cl}_2$ ) = 0.34.  $^1\text{H}$  NMR (300 MHz,  $\text{CDCl}_3$ )  $\delta$  = 9.13 (brs, 1H, NH), 7.74 (d, 1H,  $J$  = 0.7 Hz, H-C(6)), 6.38 (dd, 1H,  $J$  = 10.8, 4.8 Hz, H-C(1')), 4.23 (dd, 1H,  $J$  = 4.9, 2.3 Hz, H-C(5')), 4.10 (d, 1H,  $J$  = 5.1 Hz, H-C(4')), 3.75-3.73 (m, 1H, OH), 2.77 (dd, 1H,  $J$  = 13.9, 4.8 Hz, H-C(2')), 2.45-2.34 (m, 2H, H-

C(2'), H-C(6')), 1.81 (s, 3H, CH<sub>3</sub>), 1.76-1.70 (m, 1H, H-C(7')), 1.18 (s, 9H, COC(CH<sub>3</sub>)<sub>3</sub>), 0.70-0.63, 0.30-0.26 (2×m, 2×1H, H-C(8')) ppm; <sup>13</sup>C NMR (75 MHz, CDCl<sub>3</sub>) δ = 178.2 (s, COC(CH<sub>3</sub>)<sub>3</sub>), 164.0 (s, C(4)), 150.6 (s, C(2)), 136.6 (d, C(6)), 111.1 (s, C(5)), 94.7 (d, C(3')), 87.9 (d, C(4')), 86.6 (d, C(1')), 69.5 (d, C(5')), 39.4 (t, C(2')), 39.1 (s, COC(CH<sub>3</sub>)<sub>3</sub>), 27.1 (q, COC(CH<sub>3</sub>)<sub>3</sub>), 24.7 (d, C(7')), 22.3 (d, C(6')), 12.4 (q, CH<sub>3</sub>), 6.9 (t, C(8')) ppm. ESI-HRMS: calc. for C<sub>18</sub>H<sub>24</sub>N<sub>2</sub>NaO<sub>6</sub> 387.1532 [M+Na]<sup>+</sup>, found 387.1510

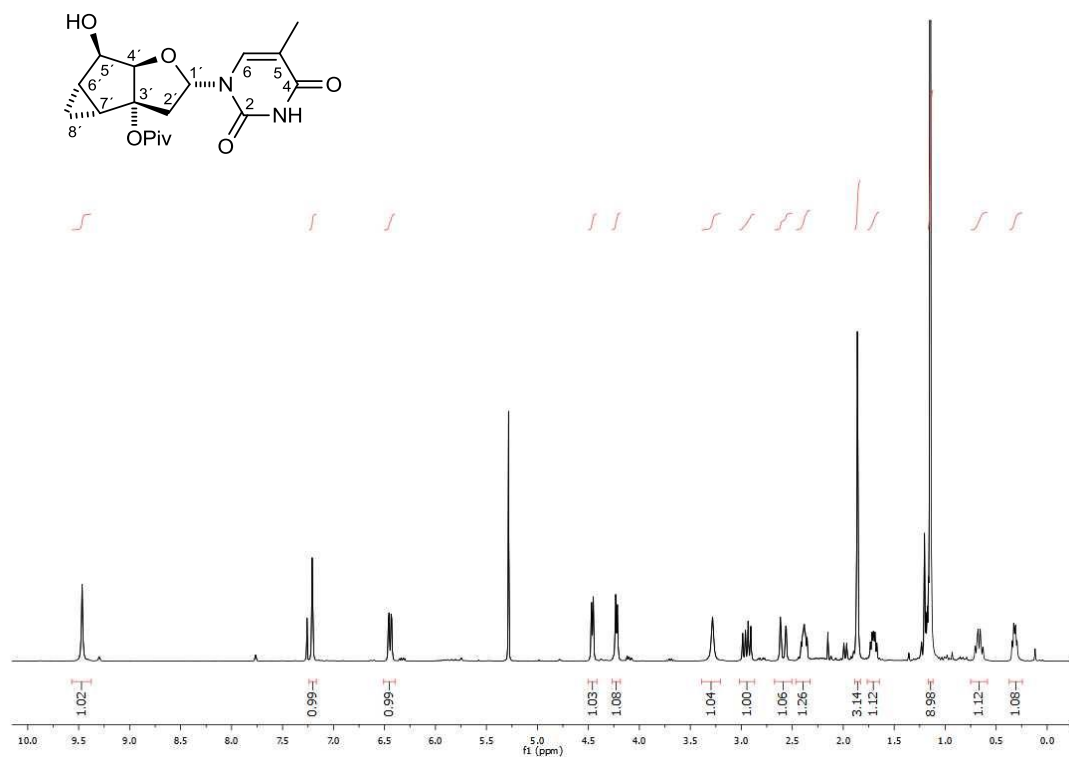

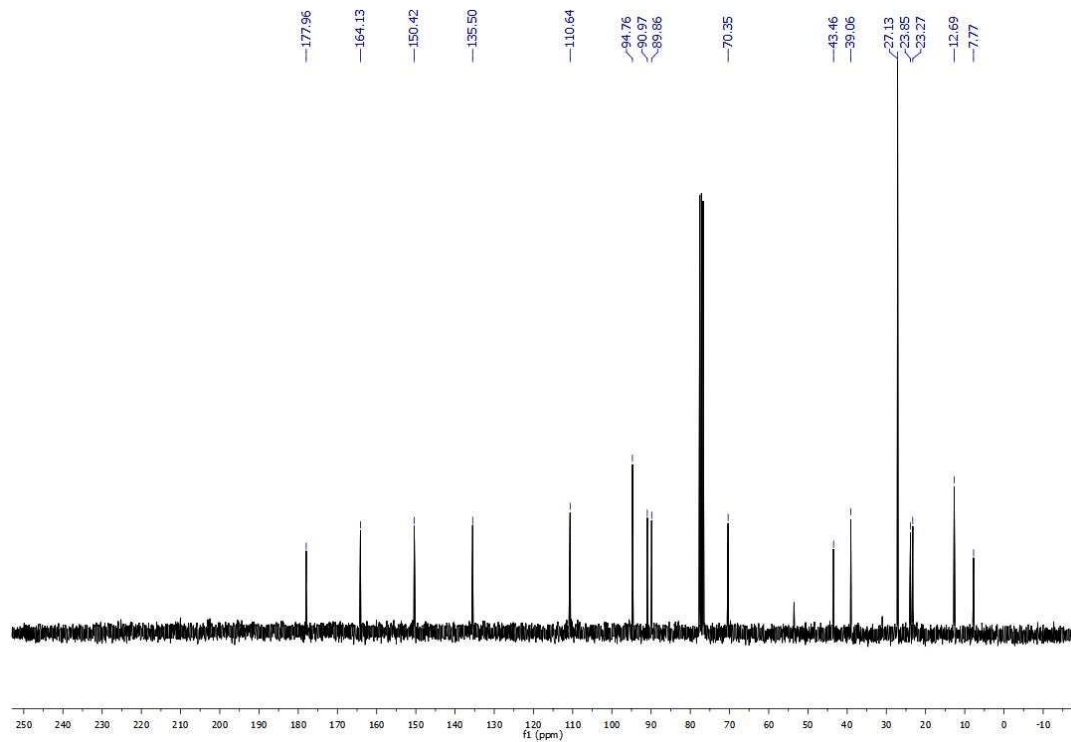

**Figure S7:**  $^1\text{H}$  ( $\text{CDCl}_3$ , 400 MHz) and  $^{13}\text{C}$  NMR ( $\text{CD}_3\text{OD}$ , 75 MHz) spectrum of **7 $\alpha$**

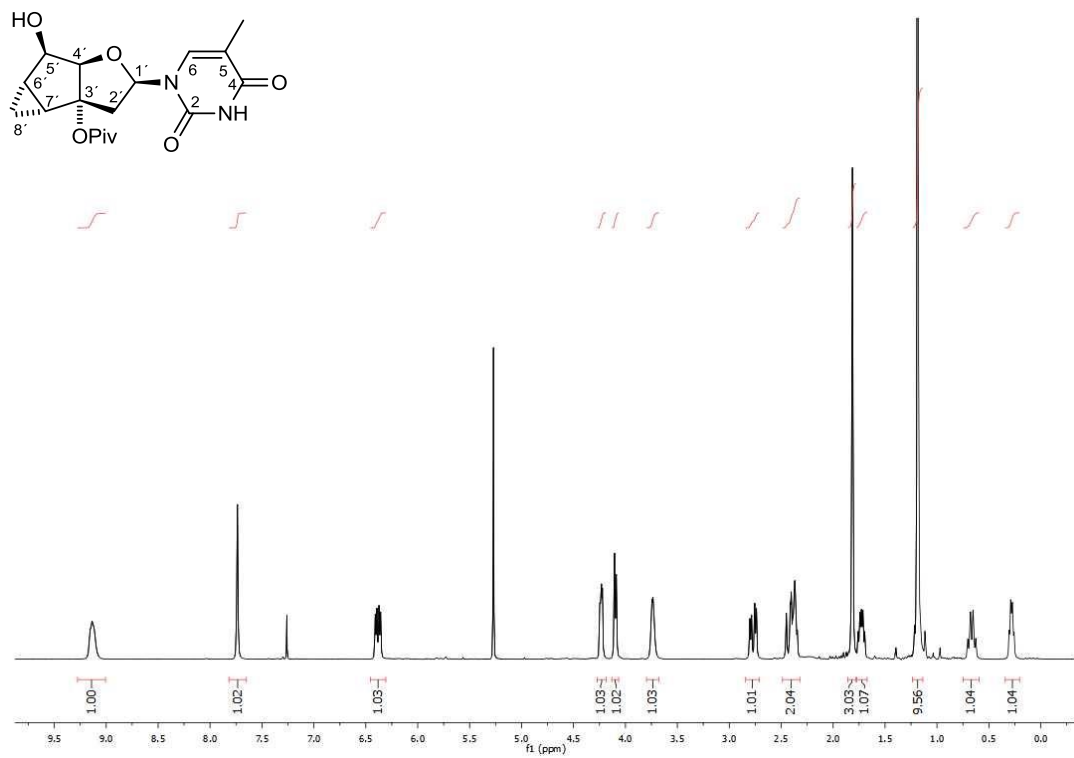

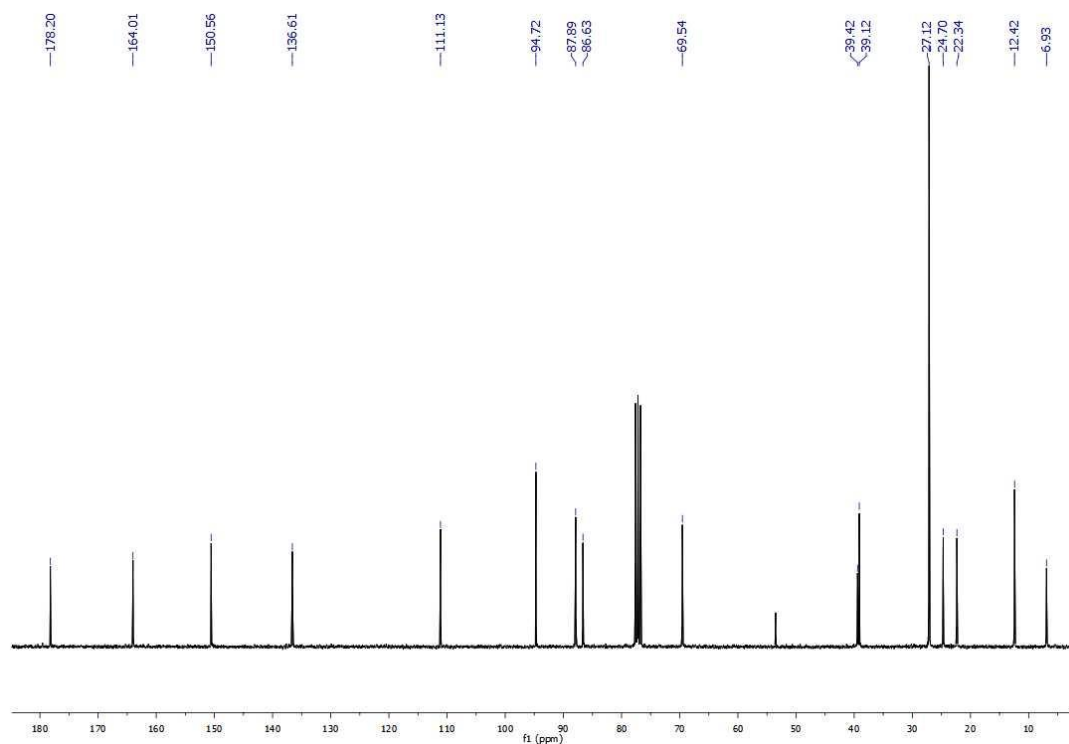

**Figure S8:**  $^1\text{H}$  ( $\text{CDCl}_3$ , 400 MHz) and  $^{13}\text{C}$  NMR ( $\text{CDCl}_3$ , 75 MHz) spectrum of **7 $\beta$**

**(5'R)-(2'-Deoxy-3',5'-ethano-6',7'-methano- $\beta$ -D-ribofuranosyl)thymine (8).** The solution of **7 $\beta$**  (0.235 g, 0.64 mmol) in dioxane (3 mL) was treated with  $\text{Bu}_4\text{NOH}$  (4.3 mL, 6.45 mmol) at ambient temperature for 16 h. The mixture was diluted with 10 mL of EtOAc/EtOH (9:1) silica-gel was added and all volatiles were removed in vacuo. The product was isolated by CC (EtOAc/EtOH 9:1) to afford title compound **8** (171 mg, 94%) as a white solid.

*Data for 8:*  $R_f$  = 0.47 (EtOAc/EtOH 9:1);  $^1\text{H}$  NMR ( $\text{CD}_3\text{OD}$ , 400 MHz)  $\delta$  8.32 (*q*, 1H,  $J$  = 1.2 Hz H-C(6)), 6.45 (*dd*,  $J$  = 10.1, 4.9 Hz, 1H, H-C(1')), 4.17 (*d*,  $J$  = 5.4 Hz, 1H, H-C(5')), 3.85 (*d*,  $J$  = 5.3 Hz, 1H, H-C(4')), 2.32 (*dd*,  $J$  = 12.6, 4.9 Hz, 1H), 2.24 (*dd*,  $J$  = 12.6, 10.2 Hz, 1H, H-C(2')), 1.88 (*d*,  $J$  = 1.1 Hz, 3H,  $\text{CH}_3\text{-C}(5)$ ), 1.74 (*ddd*,  $J$  = 8.1, 5.7, 3.8 Hz, H-C(7')), 1.59 (*ddd*,  $J$  = 8.9, 5.6, 4.4 Hz H-C(6')), 0.69-0.63 (*m*, 1H, H-C(8')), 0.46 (*dt*,  $J$  = 5.8, 4.1 Hz, 1H, H-C(8')) ppm;  $^{13}\text{C}$  NMR ( $\text{CD}_3\text{OD}$ , 75 MHz)  $\delta$  166.4 (*s*, C(4)), 152.5 (*s*, C(2)), 139.2 (*d*, C(6)), 111.2 (*s*, C(5)), 90.3 (*d*, C(4')), 89.1 (*s*, C(3')), 88.5 (*d*, C(1')), 71.7 (*d*, C(5')), 44.7 (*t*, C(2')), 24.7, 24.6 (2 $\times$ *d*, C(6'), C(7')), 12.5 (*q*,  $\text{CH}_3\text{-C}(5)$ ), 7.5 (*t*, C(9')) ppm; ESI<sup>+</sup>-HRMS:  $m/z$  calcd for  $\text{C}_{13}\text{H}_{17}\text{N}_2\text{O}_5$  [ $M+\text{H}$ ]<sup>+</sup> 281.1137, found 281.1138.

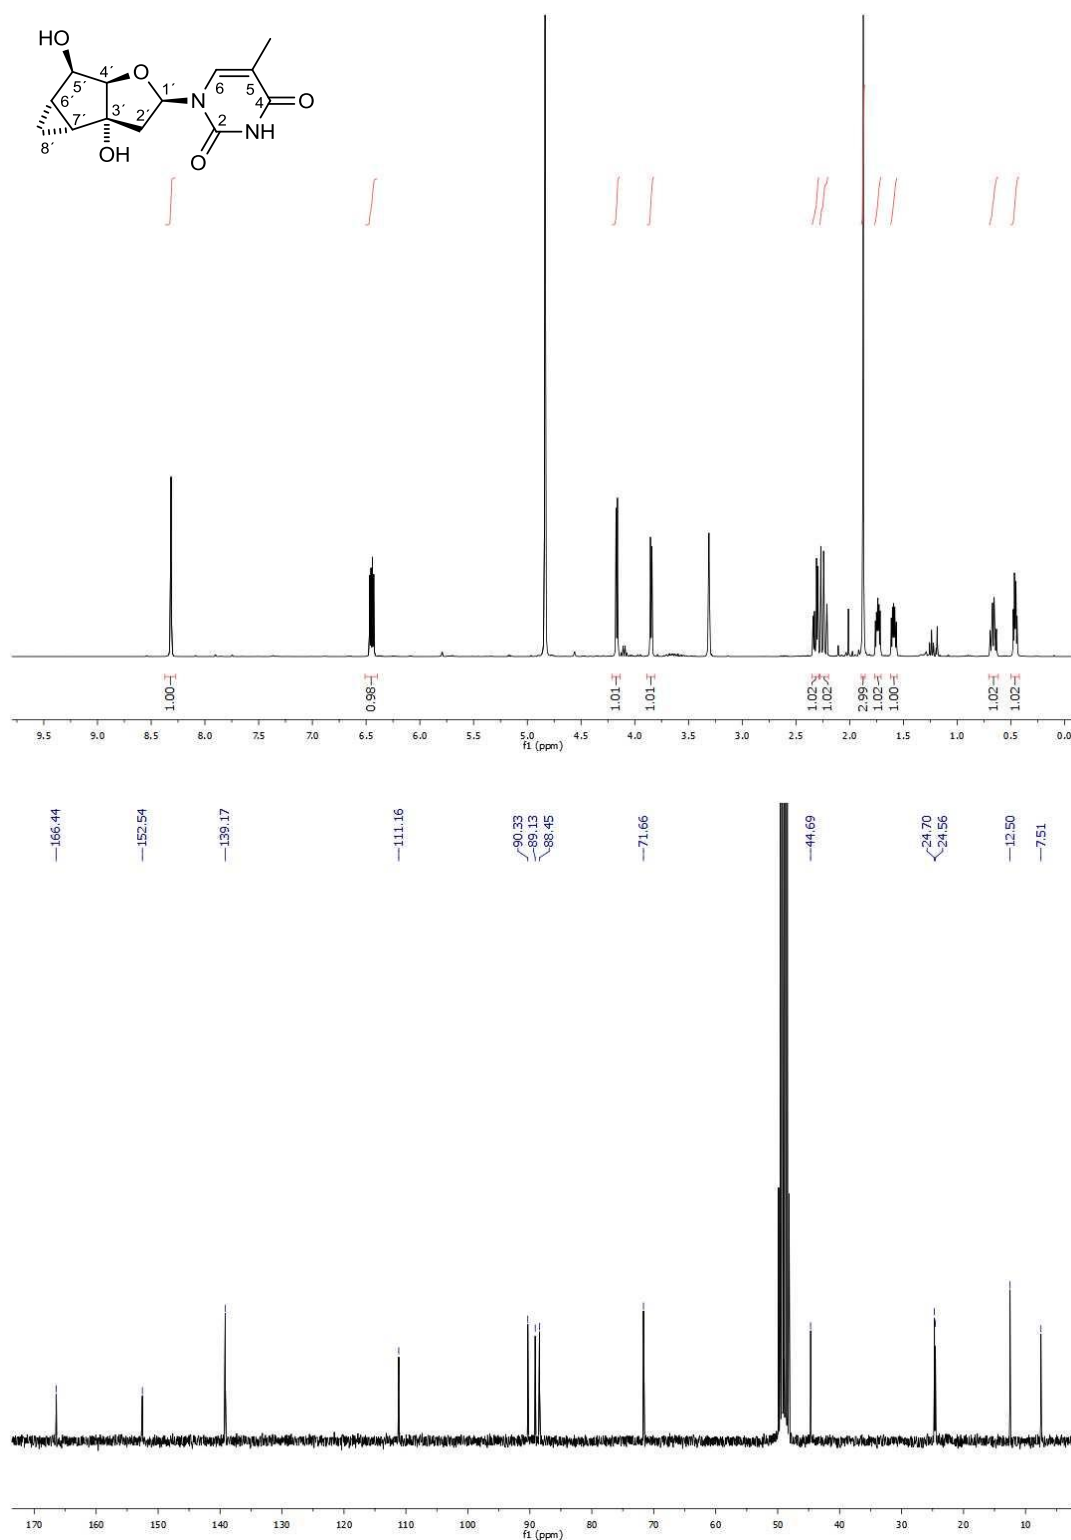

**Figure S9:** <sup>1</sup>H (CD<sub>3</sub>OD, 400 MHz) and <sup>13</sup>C NMR (CD<sub>3</sub>OD, 75 MHz) spectrum of **8**

**(5'R)-(5'-O-((4,4'-Dimethoxytriphenyl)methyl)-2'-deoxy-3',5'-ethano-6',7'-methano-β-D-ribofuranosyl)thymine (9)**. To a suspension of **8** (153 mg, 0.55 mmol) in mixture of CH<sub>2</sub>Cl<sub>2</sub> (8 mL) dry



pyridine (720  $\mu$ L) was added DMTrCl (590 mg, 1.74 mmol) in portions over 24 h and the reaction was stirred for additional 12 h at ambient temperature. The mixture was diluted with sat. aq.  $\text{NaHCO}_3$ , extracted with EtOAc and extracts dried over  $\text{MgSO}_4$ . The title compound **9** (312 mg, 98%) was isolated by CC ( $\text{CH}_2\text{Cl}_2/\text{MeOH}$  95:5) as a white foam.

*Data for 9:*  $R_f$  = 0.62 (EtOAc/EtOH 9:1);  $^1\text{H}$  NMR ( $\text{CDCl}_3$ , 300 MHz)  $\delta$  9.17 (*sbr*, 1H, NH), 7.97 (*d*,  $J$  = 1.1 Hz, 1H, H-C(6)), 7.50-7.46 (*m*, 2H), 7.40 – 7.27 (*m*, 7H), 6.87- 6.81 (*m*, 4H, H-DMTr), 6.50 (*dd*,  $J$  = 10.0, 4.2 Hz, 1H, H-C(1')), 4.27 (*d*,  $J$  = 6.1 Hz, 1H), 4.02 (*d*,  $J$  = 6.2 Hz, 1H, H-C(5',4')), 3.80, 3.79 (2 $\times$ s, 6H, H-C( $\text{OCH}_3$ )), 3.05 (*s*, 1H, OH), 2.60 (*dd*,  $J$  = 12.3, 4.2 Hz, 1H), 2.34 (*dd*,  $J$  = 12.2, 10.1 Hz, 1H, H-C(2')), 1.61- 1.55 (*m*, 1H, H-C(7')), 0.81 (*d*,  $J$  = 0.8 Hz, 3H,  $\text{CH}_3$ -C(5)), 0.38-0.17 (*m*, 3H, H-C(6',8'));  $^{13}\text{C}$  NMR ( $\text{CDCl}_3$ , 75 MHz)  $\delta$  164.1 (*s*, C(4)), 159.1 (*s*, DMTr), 150.7 (*s*, C(2)), 144.6 (*s*, DMTr), 137.0 (*d*, C(6)), 136.1, 136.0 (2 $\times$ s, DMTr), 130.9, 129.2, 128.1, 127.6, 113.3 (6 $\times$ d, DMTr), 111.1 (*s*, C(5)), 89.2 (*d*, C(1'/5')), 88.7, 88.1 (2 $\times$ s, C(3')), C-DMTr), 87.9 (*d*, C(1'/5')), 73.2 (*d*, C(4')), 55.4 (*q*,  $\text{OCH}_3$ ), 44.0 (*t*, C(2')), 24.0, 23.3 (2 $\times$ d, C(6'), C(7')), 10.8 (*q*,  $\text{CH}_3$ -C(5)), 7.4 (*t*, C(9')) ppm; ESI<sup>+</sup>-HRMS:  $m/z$  calcd for  $\text{C}_{34}\text{H}_{34}\text{N}_2\text{NaO}_7$  [ $M+\text{Na}$ ]<sup>+</sup> 605.2264, found 605.2268.

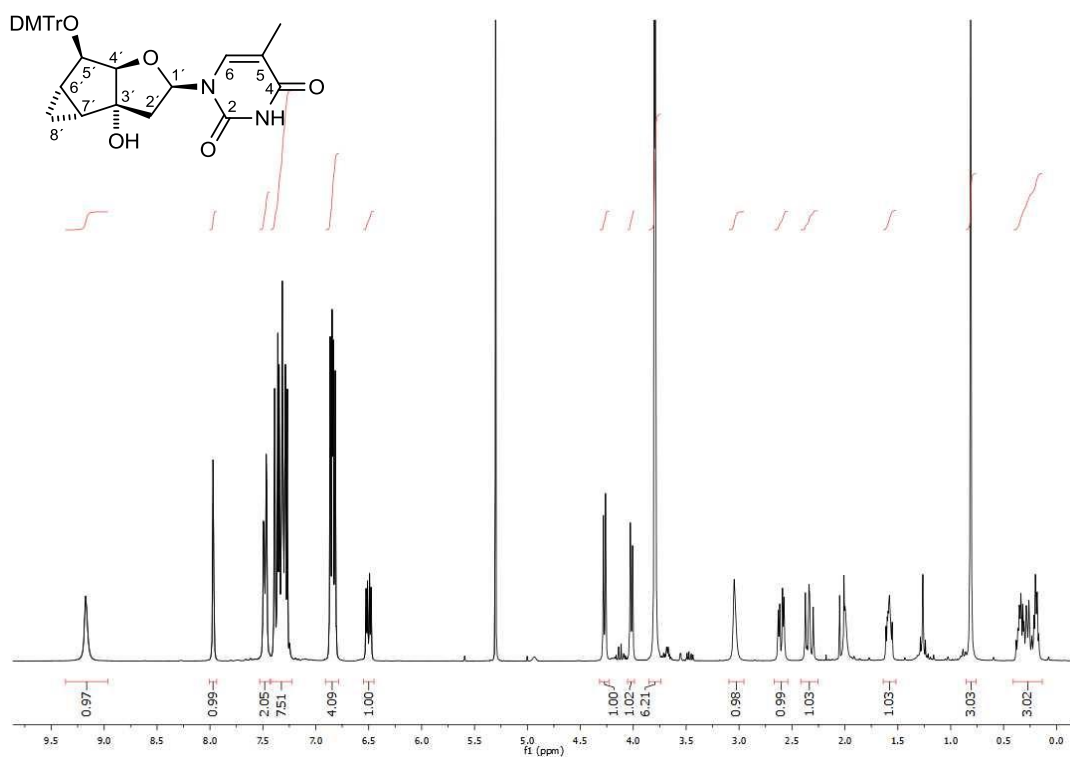

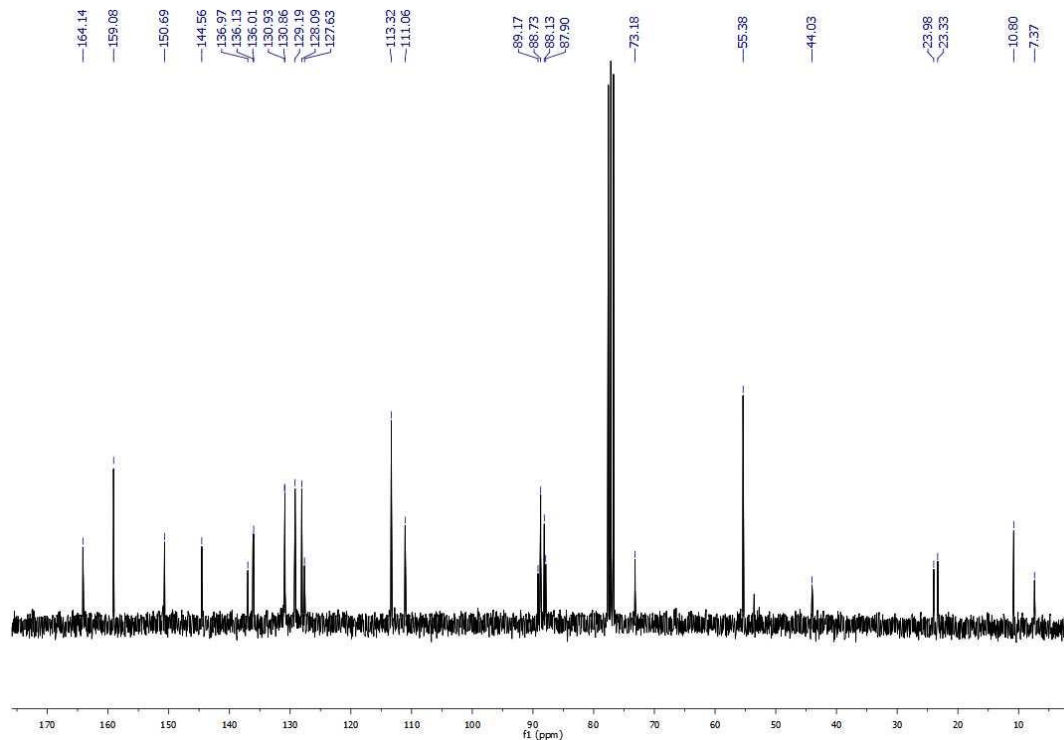

**Figure S10:**  $^1\text{H}$  ( $\text{CDCl}_3$ , 300 MHz) and  $^{13}\text{C}$  NMR ( $\text{CDCl}_3$ , 75 MHz) spectrum of **9**

**(5'R)-(5'-O-((4,4'-Dimethoxytriphenyl)methyl)-3'-O-((2-cyanoethoxy)(diisopropylamino)phosphanyl)-2'-deoxy-3',5'-ethano-6',7'-methano- $\beta$ -D-ribofuranosyl)thymine (**10**).**

To a solution of **9** (312 mg, 0.54 mmol) and *N*-ethyl-diisopropylamine (0.55 mL, 3.21 mmol) in dry THF (5 mL) was added 2-cyanoethyl *N,N*-diisopropylchlorophosphoramidite (0.36 mL, 1.61 mmol) at rt. After the solution had been stirred for 4 h, the mixture was poured into sat. aq.  $\text{NaHCO}_3$ , extracted with EtOAc and extracts were dried over  $\text{MgSO}_4$ . After filtration and evaporation, the residual oil was purified by CC (EtOAc/Hexane 7:3) to give the title compound **10** (373 mg, 89%) as a white foam.

*Data for 10:*  $R_f$  = 0.66, 0.51 (EtOAc/Hex 7:3);  $^1\text{H}$  NMR ( $\text{CDCl}_3$ , 400 MHz)  $\delta$  8.99 (*sbr*, 1H, NH), 7.96-7.94 (*m*, 1H, H-C(6)), 7.50-7.47 (*m*, 2H), 7.40-7.26 (*m*, 7H), 6.87-6.82 (*m*, 4H, H-DMTr), 6.48 (*dd*,  $J = 10.2, 4.0$  Hz, 1H, H-C(1')), 4.27-4.25 (*m*, 1H), 4.17-4.10 (*m*, 1H, H-C(4')), H-C(5')), 3.93-3.58 (*m*, 10H, CH-<sup>i</sup>Pr, OCH<sub>3</sub>, OCH<sub>2</sub>), 2.92-2.58 (*m*, 3H, H-C(2')), CH<sub>2</sub>CN), 2.36-2.26 (*m*, 1H, H-C(2')), 1.81-1.73 (*m*, 1H, H-C(6'/7')), 1.27-1.16 (*m*, 12H, CH<sub>3</sub>-<sup>i</sup>Pr), 0.77 (*s*, 3H, CH<sub>3</sub>-C(5)), 0.45-0.31 (*m*, 2H), 0.27-0.19 (*m*, 1H, H-C(6')), H-C(7')), H-C(8'));  $^{13}\text{C}$  NMR ( $\text{CDCl}_3$ , 75 MHz)  $\delta$  164.1 (*s*, C(4)), 159.1 (*s*, DMTr), 150.7, 150.4 (2 $\times$ *s*, C(2)), 144.5 (*s*, DMTr), 137.0, 136.9 (2 $\times$ *d*, C(6)), 136.1, 136.0, 135.9 (4 $\times$ *s*, DMTr), 131.0, 130.9, 129.2, 128.1, 127.6 (6 $\times$ *d*, DMTr), 118.5, 117.8 (2 $\times$ *s*, CN), 113.3 (*d*, DMTr), 111.0, 110.8 (2 $\times$ *s*, C(5)), 93.3 (*dd*,  $^2J(\text{C},\text{P}) = 12$  Hz, C(3')), 92.8 (*dd*,  $^2J(\text{C},\text{P}) = 10$  Hz, C(3')), 89.3 (*dd*,  $^3J(\text{C},\text{P}) = 5$  Hz, C(4')), 89.2 (*dd*,  $^3J(\text{C},\text{P}) = 4$  Hz, C(4')), 88.2 (2 $\times$ *s*, C-DMTr), 87.7, 87.6 (2 $\times$ *d*, C(1')), 72.3, 72.1 (2 $\times$ *d*, C(5')), 58.1, 57.9 (2 $\times$ *td*,  $^2J(\text{C},\text{P}) = 18$  Hz, OCH<sub>2</sub>), 55.4 (*q*, OCH<sub>3</sub>), 43.6, 43.3 (2 $\times$ *dd*,  $^2J(\text{C},\text{P}) = 13$  Hz, CH-<sup>i</sup>Pr), 24.8-24.4, 22.6-22.2 (2 $\times$ *m*, CH<sub>3</sub>-<sup>i</sup>Pr, C(6'), C(7')), 20.5 (2 $\times$ *td*,  $^3J(\text{C},\text{P}) = 8$  Hz, CH<sub>2</sub>CN), 10.7, 10.6 (2 $\times$ *q*, CH<sub>3</sub>-C(5)), 8.7 (*t*, C(8'));  $^{31}\text{P}$  NMR ( $\text{CDCl}_3$ , 122 MHz)  $\delta$  143.0, 142.3; ESI<sup>+</sup>-HRMS: *m/z* calcd for C<sub>43</sub>H<sub>51</sub>N<sub>4</sub>NaO<sub>8</sub>P [*M*+Na]<sup>+</sup> 805.3342, found 805.3354.

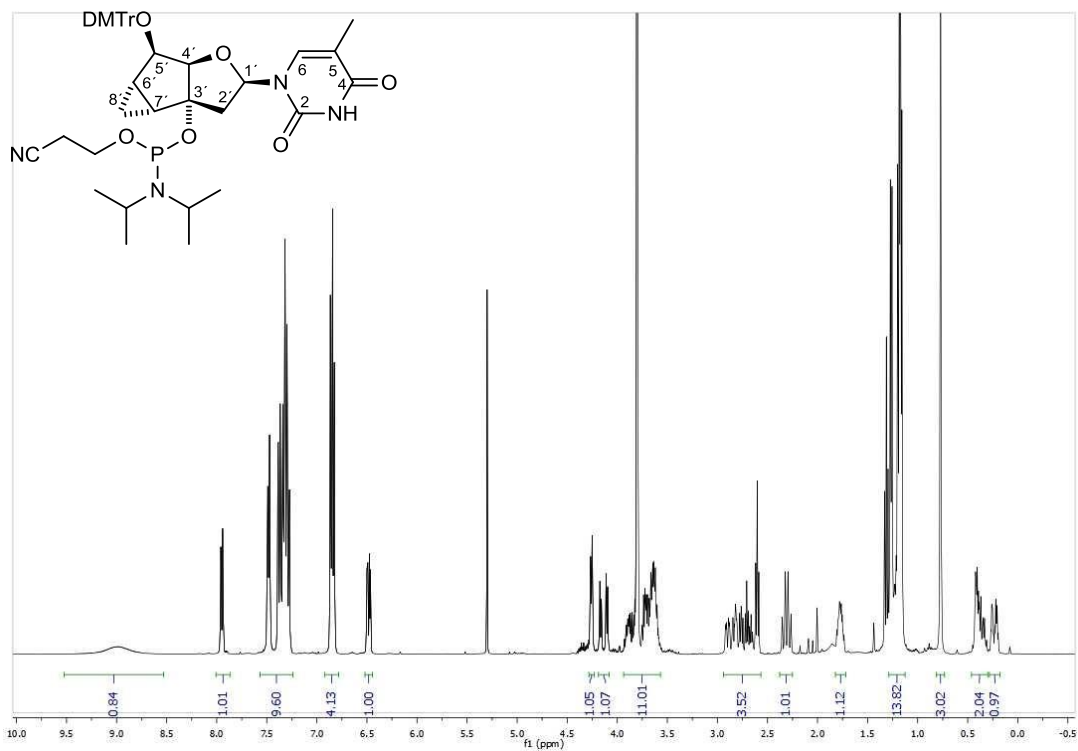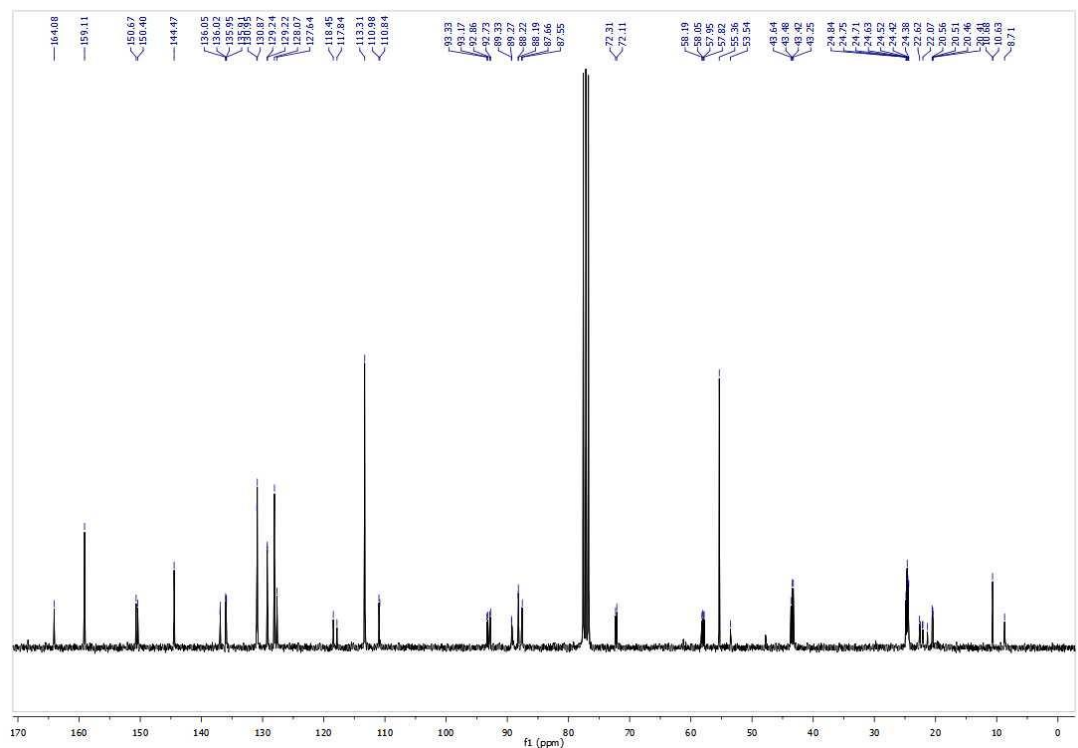

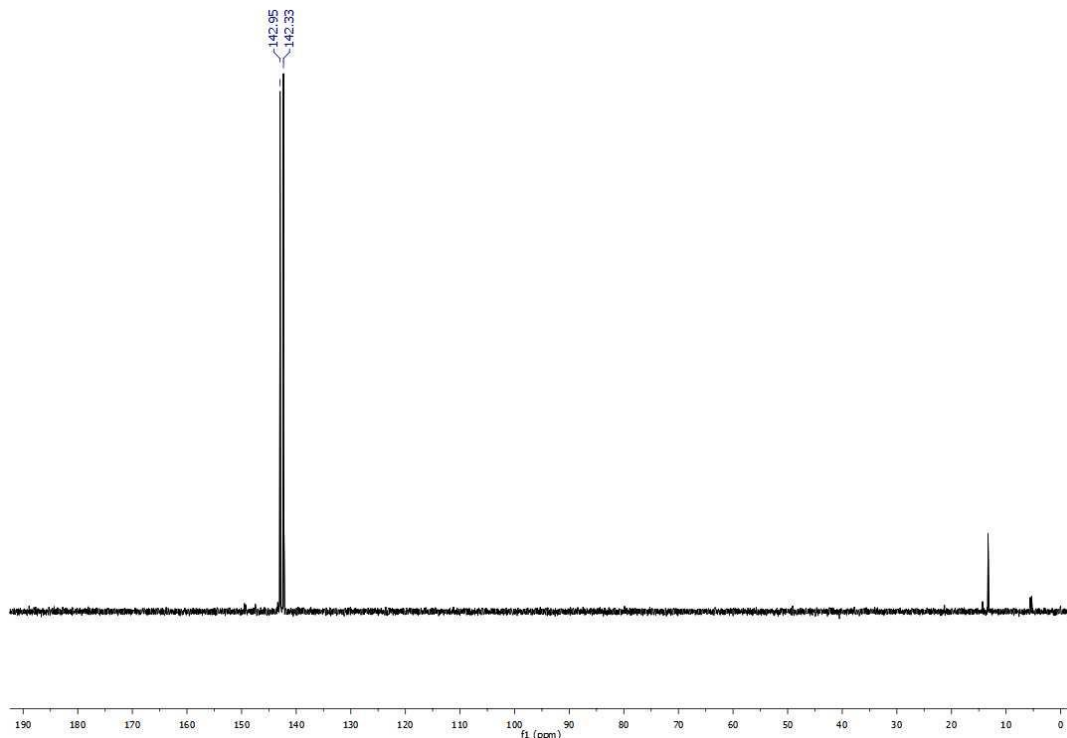

**Figure S11:**  $^1\text{H}$  ( $\text{CDCl}_3$ , 400 MHz),  $^{13}\text{C}$  ( $\text{CDCl}_3$ , 75 MHz) and  $^{31}\text{P}$  NMR ( $\text{CDCl}_3$ , 122 MHz) spectrum of **10**

**(2'-Deoxy-3',5'-etheno- $\alpha$ -and- $\beta$ -D-ribofuranosyl)thymine (**11  $\alpha,\beta$** ).** Into stirred ice-cooled suspension of thymine (0.494 g, 3.92 mmol) and **2** (0.270 g, 1.57 mmol) in MeCN (16 mL) under the atmosphere of Ar were added BSA (2.3 mL, 9.41 mmol) and TMSCl (0.05 mL, 0.63 mmol) successively and the mixture was stirred until clear solution appeared (40 min). Then the TMSOTf (1.42 mL, 7.84 mmol) was added drop wise at 0 °C, cooling bath was removed and the reaction mixture was stirred at ambient temperature for 2.5 h. The reaction was quenched by addition of sat. aq.  $\text{NaHCO}_3$  (5.5 mL), silica gel was added and all liquids were evaporated. The mixture was chromatographed to afford 0.906 g of crude product containing inseparable mixture of **11  $\alpha,\beta$**  which was used without further treatment for the subsequent step. Compounds **11  $\alpha$**  and **11  $\beta$**  (white solids) for analyses were obtained by preparative TLC (8% MeOH in  $\text{CH}_2\text{Cl}_2$ ).

*data for 11 $\beta$* :  $R_f$  (8% MeOH in  $\text{CH}_2\text{Cl}_2$ ) = 0.16;  $^1\text{H}$  NMR ( $\text{CD}_3\text{OD}$ , 300 MHz):  $\delta$  = 7.93 (q,  $J$  = 1.2 Hz, 1H; H-C(6)), 6.43 (dd,  $J$  = 8.0, 6.1 Hz, 1H; H-C(1')), 5.93 (dd,  $J$  = 5.8, 1.1 Hz, 1H), 5.86 (dd,  $J$  = 5.8, 2.0 Hz, 1H; H-C(6',7')), 4.80 (ddd,  $J$  = 5.7, 2.0, 1.1 Hz, 1H; H-C(5')), 4.21 (d,  $J$  = 5.7 Hz, 1H; H-C(4')), 2.48 (dd,  $J$  = 13.6, 6.1 Hz, 1H; H-C(2')), 2.13 (dd,  $J$  = 13.6, 8.0 Hz, 1H; H-C(2')), 1.86 (d,  $J$  = 1.2 Hz, 1H;  $\text{CH}_3$ ) ppm;  $^{13}\text{C}$  NMR ( $\text{CD}_3\text{OD}$ , 75 MHz):  $\delta$  = 166.6 (s, C(4)), 152.5 (s, C(2)), 138.8 (d, C(6)), 137.7, 135.5 (2 $\times$ d, C(6', 7')), 111.4 (s C(5)), 91.3 (s, C(3')), 89.3, 89.2 (2 $\times$ d, C(1', 5')), 75.2 (d, C(4')), 46.3 (t, C(2')), 12.6 (q,  $\text{CH}_3$ ) ppm.

*data for 11 $\alpha$* :  $R_f$  (8% MeOH in  $\text{CH}_2\text{Cl}_2$ ) = 0.16;  $^1\text{H}$  NMR ( $\text{CD}_3\text{OD}$ , 300 MHz):  $\delta$  = 7.74 (q,  $J$  = 1.2 Hz, 1H; H-C(6)), 6.22 (t,  $J$  = 6.6 Hz, 1H; H-C(1')), 5.95 (dd,  $J$  = 5.9, 0.9 Hz, 1H), 5.91 (ddd,  $J$  = 5.9, 1.7, 0.5 Hz, 1H; H-C(6',7')), 4.77 (ddd,  $J$  = 5.3, 1.6, 1.2 Hz, 1H; H-C(5')), 4.44 (d,  $J$  = 5.3 Hz, 1H; H-C(4')), 2.57 (dd,  $J$  = 13.7, 6.6

Hz, 1H; H-C(2')), 2.26 (dd,  $J = 13.7, 6.5$  Hz, 1H; H-C(2')), 1.91 (d,  $J = 1.2$  Hz, 3H, H-CH<sub>3</sub>) ppm; <sup>13</sup>C NMR (CD<sub>3</sub>OD, 75 MHz):  $\delta = 166.6$  (s, C(4)), 152.5 (s, C(2)), 138.3 (d, C(6)), 137.2, 136.8 (2xd, C(6', 7')), 111.9 (s, C(5)), 90.7 (s, C(3')), 89.1 (2xd, C(1', 4')), 76.2 (d, C(5')), 45.7 (t, C(2')), 12.6 (q, CH<sub>3</sub>) ppm.

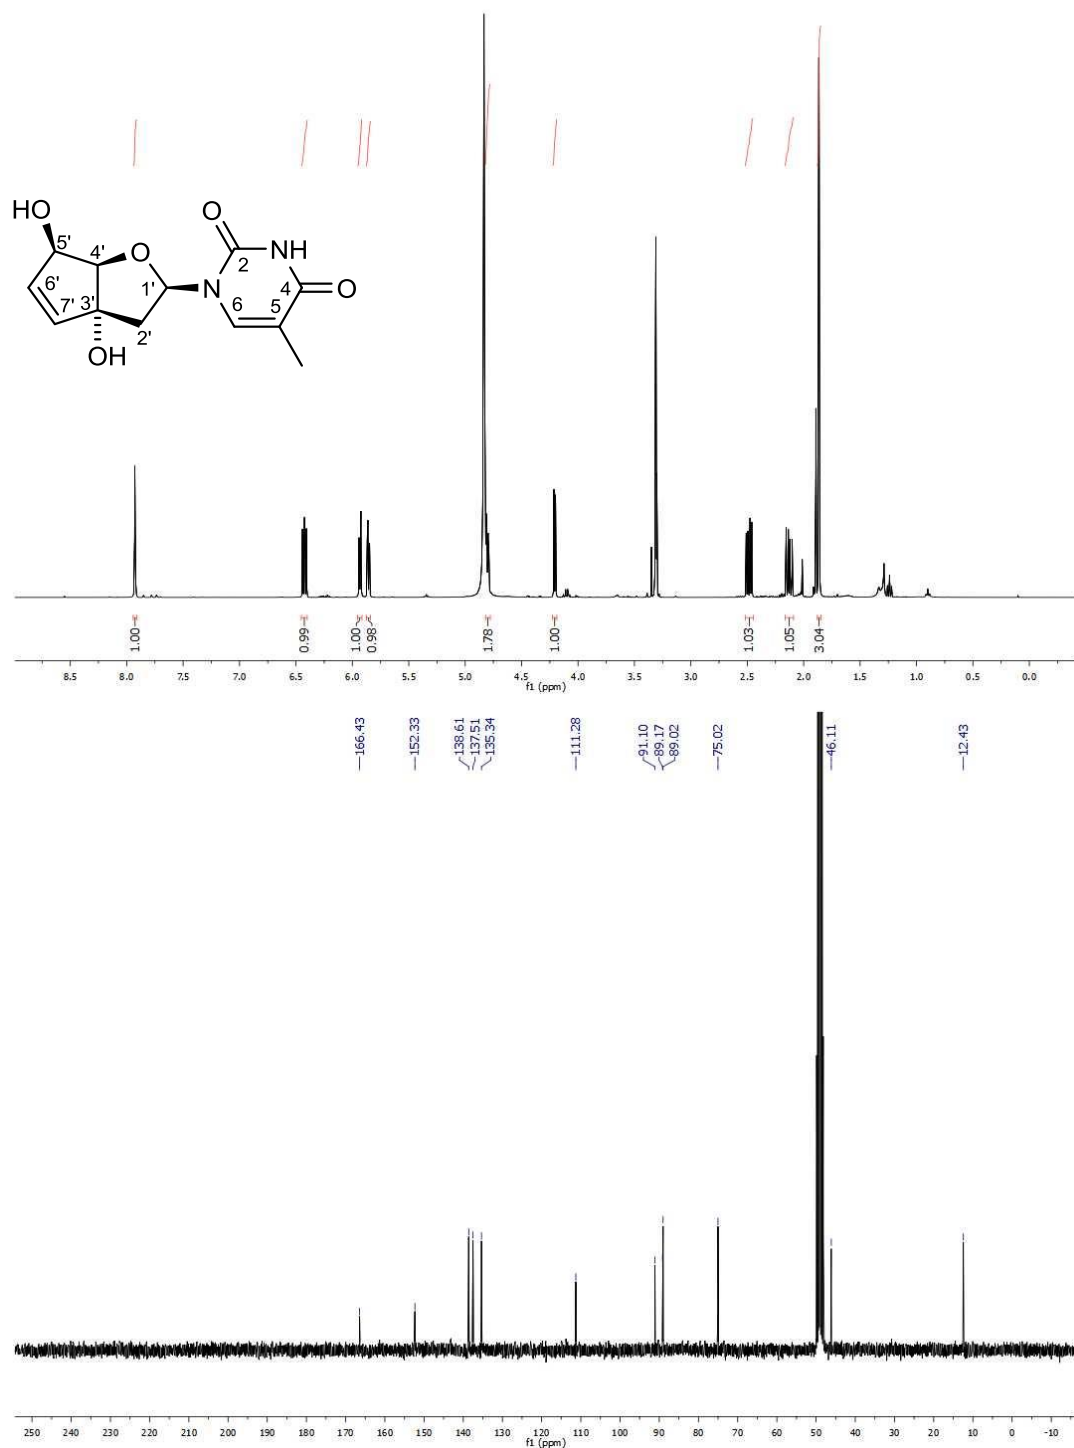

**Figure S12:** <sup>1</sup>H (CD<sub>3</sub>OD, 300 MHz), <sup>13</sup>C NMR (CD<sub>3</sub>OD, 75 MHz) spectrum of **11β**

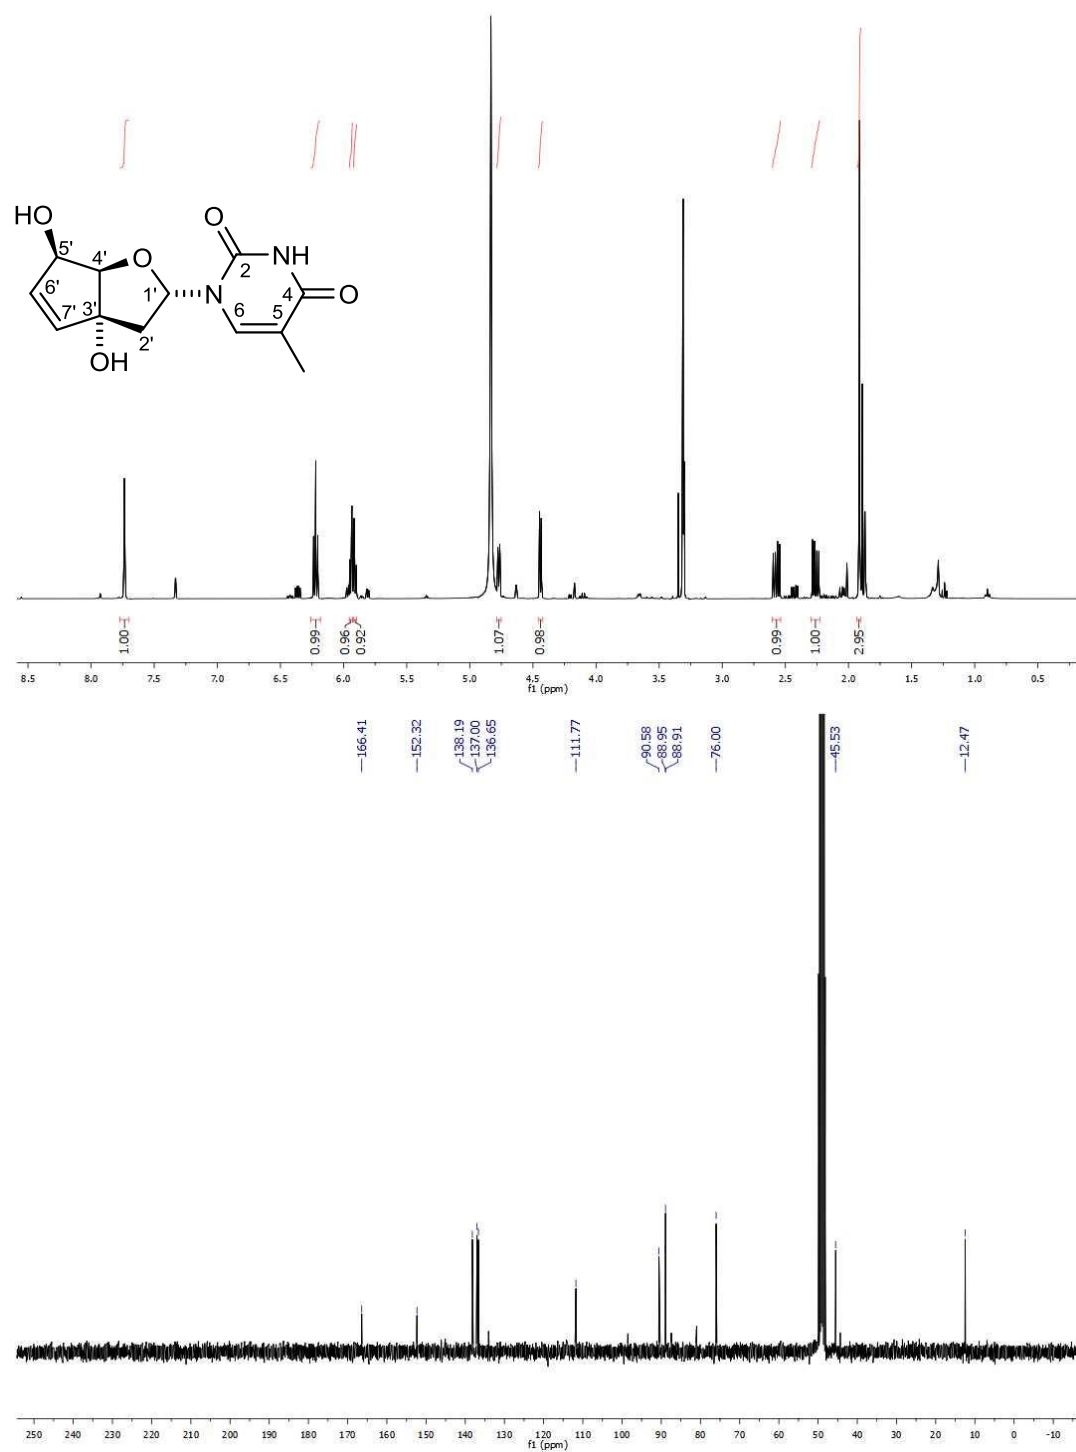

**Figure S13:**  $^1\text{H}$  ( $\text{CD}_3\text{OD}$ , 300 MHz),  $^{13}\text{C}$  NMR ( $\text{CD}_3\text{OD}$ , 75 MHz) spectrum of **11a**

**[5'-O-((4,4'-Dimethoxytriphenyl)methyl)-2'-deoxy-3',5'-etheno- $\alpha$ -and- $\beta$ -D-ribofuranosyl]thymine (**12 $\alpha$ , $\beta$** ). The crude mixture of **11 $\alpha$ , $\beta$**  (0.906 g, containing max. 1.57 mmol of **11 $\alpha$ , $\beta$** ) was dissolved in dry pyridine (15 mL) and DMTCl (1.06 g, 3.14 mmol) was added in one portion. The solution was stirred overnight at RT under atmosphere of Ar. It was poured into sat. aq. NaHCO<sub>3</sub> and extracted with EtOAc. Extracts were dried with MgSO<sub>4</sub> and after evaporation chromatographed (silica gel, 3.5% MeOH in CH<sub>2</sub>Cl<sub>2</sub>) to provide 0.262 g of **12 $\alpha$**  (29%, pale yellow foam) and 0.307 g of **12 $\beta$**  (34%, pale yellow foam).**

*data for 12 $\beta$* : R<sub>f</sub> (8% MeOH in CH<sub>2</sub>Cl<sub>2</sub>) = 0.33; <sup>1</sup>H NMR (CDCl<sub>3</sub>, 400 MHz):  $\delta$  = 8.95 (s, 1H; NH), 7.96 (q, *J* = 1.2 Hz, 1H; H-C(6)), 7.54-7.48 (m, 2H), 7.46-7.36 (m, 4H), 7.31-7.17 (m, 3H), 6.87-6.78 (m, 4H; Ph), 6.18 (dd, *J* = 6.6, 4.0 Hz, 1H; H-C(1')), 5.53 (dd, *J* = 5.7, 1.6 Hz, 1H; H-C(7')), 4.80 (dt, *J* = 5.3, 1.6 Hz, 1H; H-C(5')), 4.69 (ddd, *J* = 5.6, 1.6, 0.8 Hz, 1H; H-C(6')), 4.16 (d, *J* = 5.3 Hz, 1H; H-C(4')), 3.77 (2xs, 2x3H; OMe), 2.71 (dd, *J* = 14.1, 6.6 Hz, 1H; H-C(2')), 2.47 (s, 1H; OH), 2.31 (dd, *J* = 14.1, 4.0 Hz, 1H; H-C(2')), 1.66 (d, *J* = 1.2 Hz, 3H; H-CH<sub>3</sub>) ppm; <sup>13</sup>C NMR (CDCl<sub>3</sub>, 100 MHz):  $\delta$  = 164.3 (s, C(4)), 159.0 (s, C-Ph), 150.6 (s, C(2)), 145.3 (s, C-Ph), 137.3 (d, C(6)), 136.6 (d, C(6')), 136.4 (2xs, C-Ph), 134.6 (d, C(7')), 130.3, 128.3, 127.3, 113.6 (7xd, C-Ph), 109.6 (s C(5)), 89.5 (s, C(3')), 88.6 (d, C(1')), 88.2 (d, C(4')), 88.1 (s, C(CPh<sub>3</sub>)), 77.5 (d, C(5')), 55.5 (q, OCH<sub>3</sub>), 45.9 (t, C(2')), 12.4 (q, CH<sub>3</sub>) ppm; ESI<sup>+</sup>-HRMS: calcd for C<sub>33</sub>H<sub>32</sub>N<sub>2</sub>NaO<sub>7</sub>: 591.2102 [M+Na]<sup>+</sup>; found: 591.2121.

*data for 12 $\alpha$* : R<sub>f</sub> (8% MeOH in CH<sub>2</sub>Cl<sub>2</sub>) = 0.33; <sup>1</sup>H NMR (CDCl<sub>3</sub>, 400 MHz):  $\delta$  = 8.85 (s, 1H; NH), 7.51-7.48 (m, 2H), 7.43-7.34 (m, 4H), 7.32-7.22 (m, 3H; H-Ph, H-C(6)), 7.23-7.15 (m, 1H), 6.85-6.76 (m, 4H; Ph), 6.26 (dd, *J* = 7.3, 5.4 Hz, 1H; H-C(1')), 5.70 (dd, *J* = 5.9, 1.0 Hz, 1H; H-C(7')), 4.73 (dd, *J* = 5.9, 1.9 Hz, 1H; H-C(6')), 4.62 (ddd, *J* = 5.8, 1.9, 1.2 Hz, 1H; H-C(5')), 4.16 (d, *J* = 5.8 Hz, 1H; H-C(4')), 3.77 (s, 6H; OMe), 3.02 (s, 1H; OH), 2.67 (dd, *J* = 14.1, 7.3 Hz, 1H; H-C(2')), 2.30 (dd, *J* = 14.1, 5.4 Hz, 1H; H-C(2')), 1.94 (d, *J* = 1.1 Hz, 3H; H-CH<sub>3</sub>) ppm; <sup>13</sup>C NMR (CDCl<sub>3</sub>, 100 MHz):  $\delta$  = 164.0 (s, C(4)), 158.9 (s, C-Ph), 150.5 (s, C(2)), 145.5 (s, C-Ph), 137.7 (d, C(6)), 137.0, 136.8 (2xs, C-Ph), 135.5, 135.4 (2xd, C(6', 7')), 130.5, 128.5, 128.1, 127.1, 113.4 (7xd, C-Ph), 111.1 (s C(5)), 90.3, 90.3 (s, d, C(1', 3')), 88.8 (d, C(4')), 87.6 (s, CPh<sub>3</sub>), 76.7 (d, C(5')), 55.5 (q, OCH<sub>3</sub>), 45.1 (t, C(2')), 12.7 (q, CH<sub>3</sub>) ppm; ESI<sup>+</sup>-HRMS: calcd for C<sub>33</sub>H<sub>32</sub>N<sub>2</sub>NaO<sub>7</sub>: 591.2102 [M+Na]<sup>+</sup>; found: 591.2122.

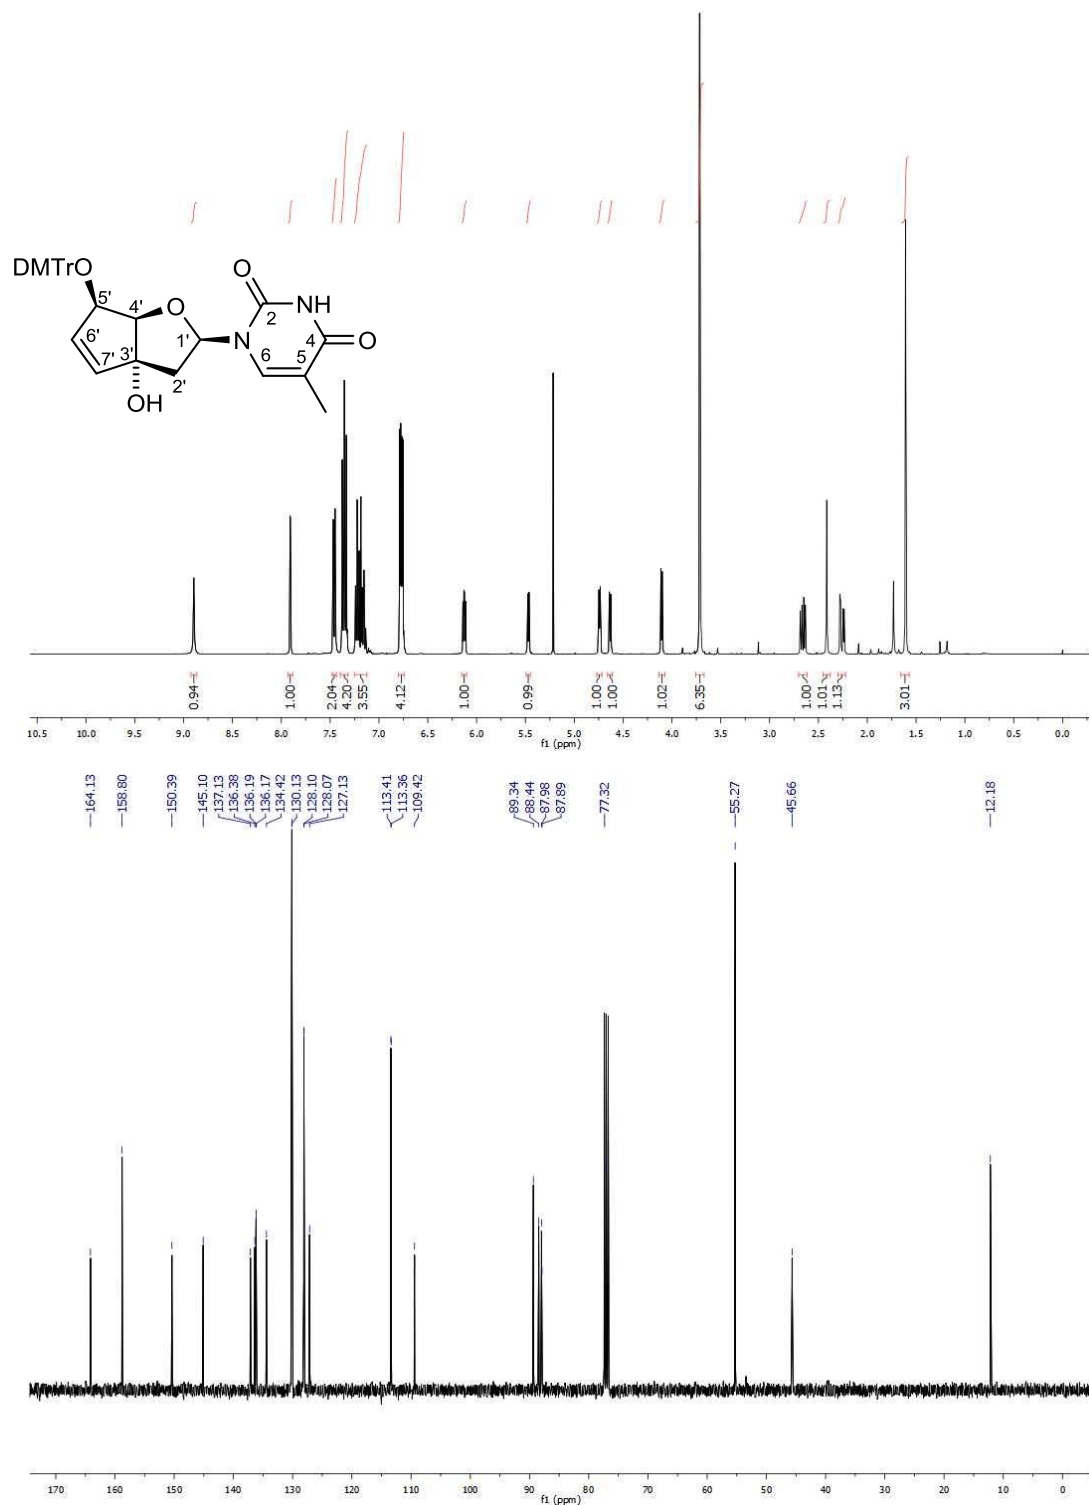

**Figure S14:** <sup>1</sup>H (CDCl<sub>3</sub>, 400 MHz), <sup>13</sup>C NMR (CDCl<sub>3</sub>, 100 MHz) spectrum of **12β**



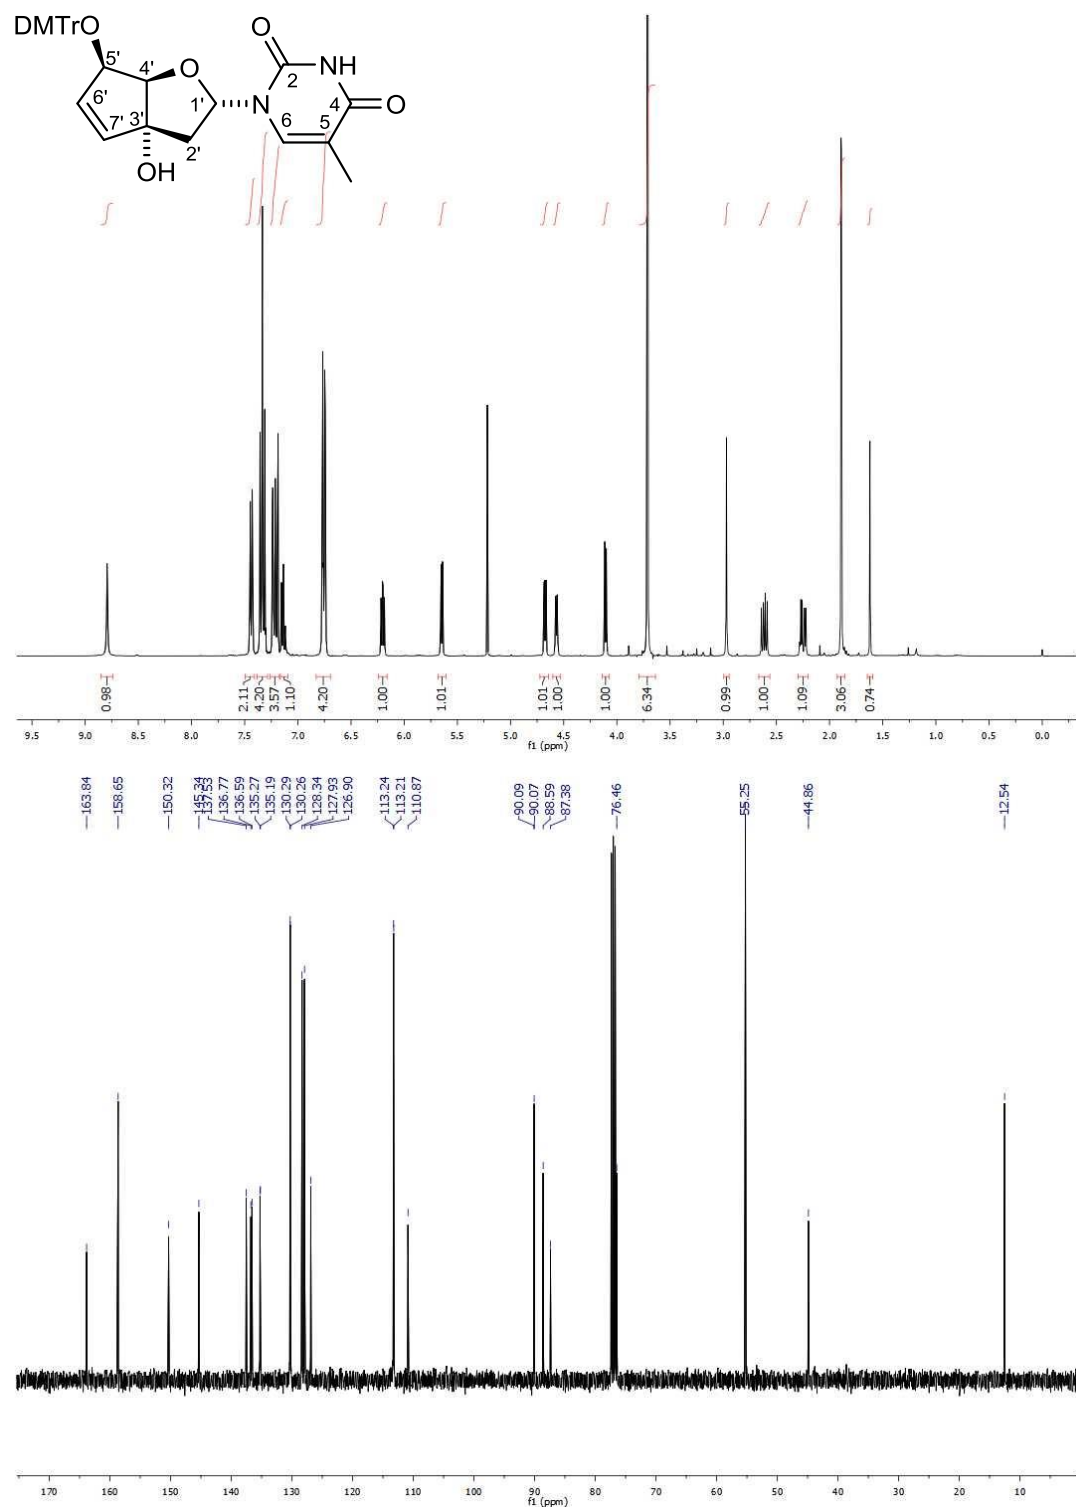

**Figure S15:** <sup>1</sup>H (CDCl<sub>3</sub>, 400 MHz), <sup>13</sup>C NMR (CDCl<sub>3</sub>, 100 MHz) spectrum of **12a**

**{3'-O-[(2-Cyanoethoxy)(diisopropylamino)phosphanyl]-5'-O-(4,4'-dimethoxytriphenyl)methyl-2'-deoxy-3',5'-etheno-β-D-ribofuranosyl}thymine (**13**).** 2-Cyanoethyl *N,N*-diisopropylchlorophosphoramidite (CEPCI, 0.34 mL, 1.51 mmol) was added at RT into a solution of

nucleoside **12 $\beta$**  (0.286 g, 0.50 mmol) and DIPEA (0.52 mL, 3.02 mmol) in dry THF (5 mL). After stirring for 1 h under an Ar atmosphere, the mixture was poured into sat. aq. NaHCO<sub>3</sub> and extracted with Et<sub>2</sub>O. Extracts were dried with MgSO<sub>4</sub> and after evaporation of solvents the remaining crude was purified by CC (EtOAc/hexane 7:3) to provide title compound **13** (0.355 g, 94%) as a white foam.

*data for 13*: R<sub>f</sub> (7:3 EtOAc/hexane) = 0.57, 0.43; <sup>1</sup>H NMR (CDCl<sub>3</sub>, 400 MHz):  $\delta$  = 8.83 (brs, 1H; NH), 7.98 (q,  $J$  = 1.2 Hz, 0.4H; H-C(6)), 7.91 (q,  $J$  = 1.2 Hz, 0.6H; H-C(6)), 7.56-7.47 (m, 2H), 7.46-7.34 (m, 4H), 7.36-7.16 (m, 3H), 6.89-6.77 (m, 4H; H-Ph), 6.18 (dd,  $J$  = 6.6, 4.3 Hz, 0.6H; H-C(1')), 6.13 (dd,  $J$  = 6.7, 3.6 Hz, 0.4H; H-C(1')), 5.71 (d,  $J$  = 5.7 Hz, 0.6H; H-C(7')), 5.64 (dt,  $J$  = 5.5, 1.4 Hz, 0.4H; H-C(7')), 4.78 (d,  $J$  = 5.9 Hz, 0.6H; H-C(6')), 4.76 – 4.69 (m, 1.4H; H-C(6', 5')), 4.28 (d,  $J$  = 5.1 Hz, 0.4H; H-C(4')), 4.23 (d,  $J$  = 5.3 Hz, 0.6H; H-C(4')), 3.79, 3.78, 3.77 (4xs, 6H; OMe), 3.71-3.43 (m, 4H; H-C(*i*-Pr), OCH<sub>2</sub>), 2.89-2.84 (m, 1H; H-C(2')), 2.55-2.49 (m, 1H; -CH<sub>2</sub>CN), 2.42-2.33 (m, 1H; H-C(2')), 2.34-2.18 (m, 1H; CH<sub>2</sub>CN), 1.69 (d,  $J$  = 1.2 Hz, 1.3H; H-CH<sub>3</sub>), 1.66 (d,  $J$  = 1.2 Hz, 1.8H; H-CH<sub>3</sub>), 1.11 – 1.05 (m, 9H; CH(CH<sub>3</sub>)<sub>2</sub>), 1.01 (d,  $J$  = 6.8 Hz, 3H; CH(CH<sub>3</sub>)<sub>2</sub>) ppm; <sup>13</sup>C NMR (CDCl<sub>3</sub>, 100 MHz):  $\delta$  = 164.3, 164.2 (2xs, C(4)), 159.0 (2xs, C-Ph), 150.5 (s, C(2)), 145.3 (2xs, C-Ph), 137.3, 137.1 (2xd, C(6)), 136.8 (d, C(7')), 136.5 (s, C-Ph), 136.4 (d, C(6')), 136.3 (s, C-Ph), 134.4 (dd, <sup>3</sup> $J$ (C,P) = 7 Hz, C(7')), 134.0 (dd, <sup>3</sup> $J$ (C,P) = 8 Hz, C(7')), 130.4, 130.3, 128.3, 128.2, 127.4, 127.3 (9xd, C-Ph), 117.7, 117.4 (2xs, CN), 113.7, 113.6, 113.5 (4xd, C-Ph), 109.7, 109.4 (2xs C(5)), 92.4 (d, <sup>2</sup> $J$ (C,P) = 11 Hz, C(3')), 92.5 d, <sup>2</sup> $J$ (C,P) = 10 Hz, C(3')), 88.1 (2xs, C(1')), 88.1 (2xs, C(CPh<sub>3</sub>)), 87.8, 87.7 (2xd, C(4')), 77.6 (dd, <sup>4</sup> $J$ (C,P) = 1 Hz, C(5')), 77.3 (dd, <sup>4</sup> $J$ (C,P) = 3 Hz, C(5')), 58.2 (dt, <sup>2</sup> $J$ (C,P) = 18 Hz, OCH<sub>2</sub>), 58.0 (dt, <sup>2</sup> $J$ (C,P) = 17 Hz, OCH<sub>2</sub>), 55.5 (2xq, OCH<sub>3</sub>), 46.2, 46.1 (2xdt, <sup>3</sup> $J$ (C,P) = 6 Hz, C(2')), 43.6, 43.5 (2xdd, <sup>2</sup> $J$ (C,P) = 13 Hz, CH(CH<sub>3</sub>)<sub>2</sub>), 24.7, 24.5, 24.4 (3xdq, <sup>3</sup> $J$ (C,P) = 6 Hz, CH(CH<sub>3</sub>)<sub>2</sub>), 20.5, 20.0, (2xdt, <sup>3</sup> $J$ (C,P) = 7 Hz, -CH<sub>2</sub>CN), 12.4 (q, CH<sub>3</sub>) ppm; <sup>31</sup>P NMR (122 MHz, CDCl<sub>3</sub>):  $\delta$  = 143.60, 142.99 ppm; ESI<sup>+</sup>-HRMS: calcd for C<sub>42</sub>H<sub>49</sub>N<sub>4</sub>NaO<sub>8</sub>P: 791.3180 [M+Na]<sup>+</sup>; found: 791.3160.

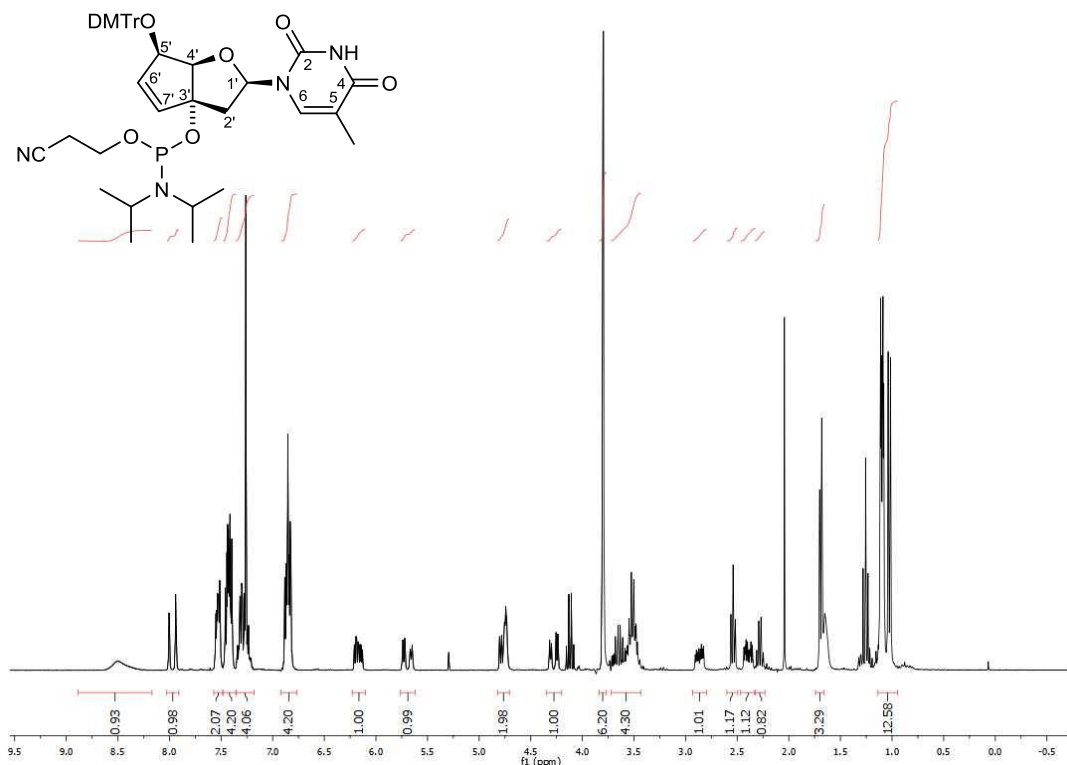

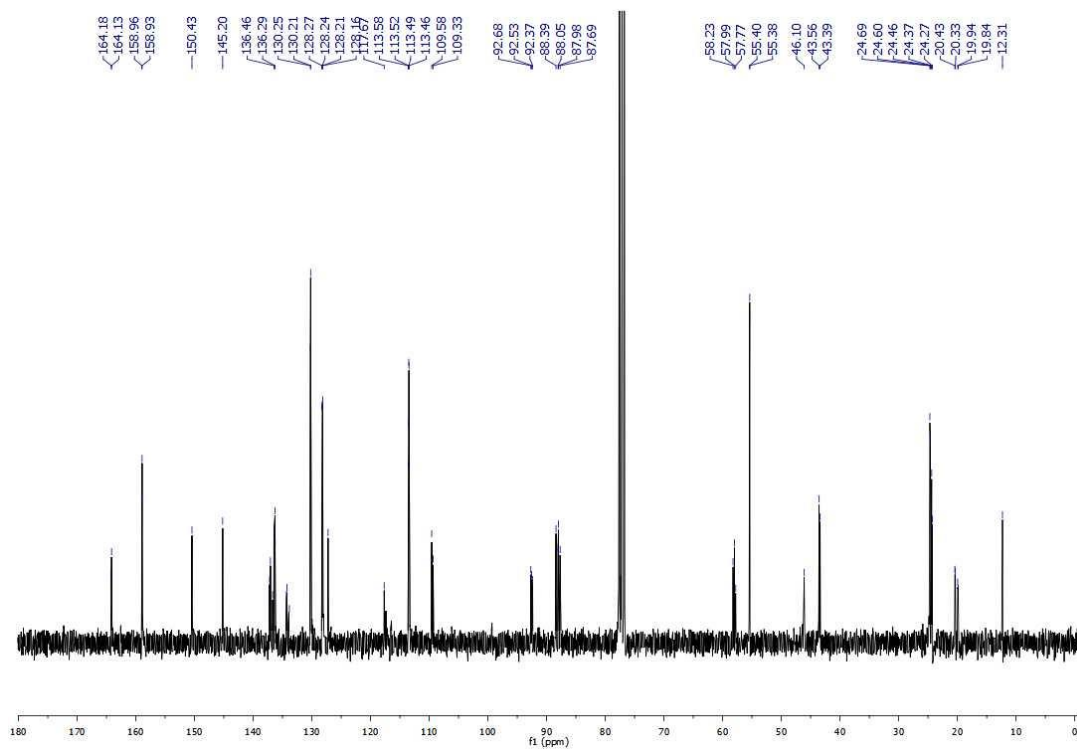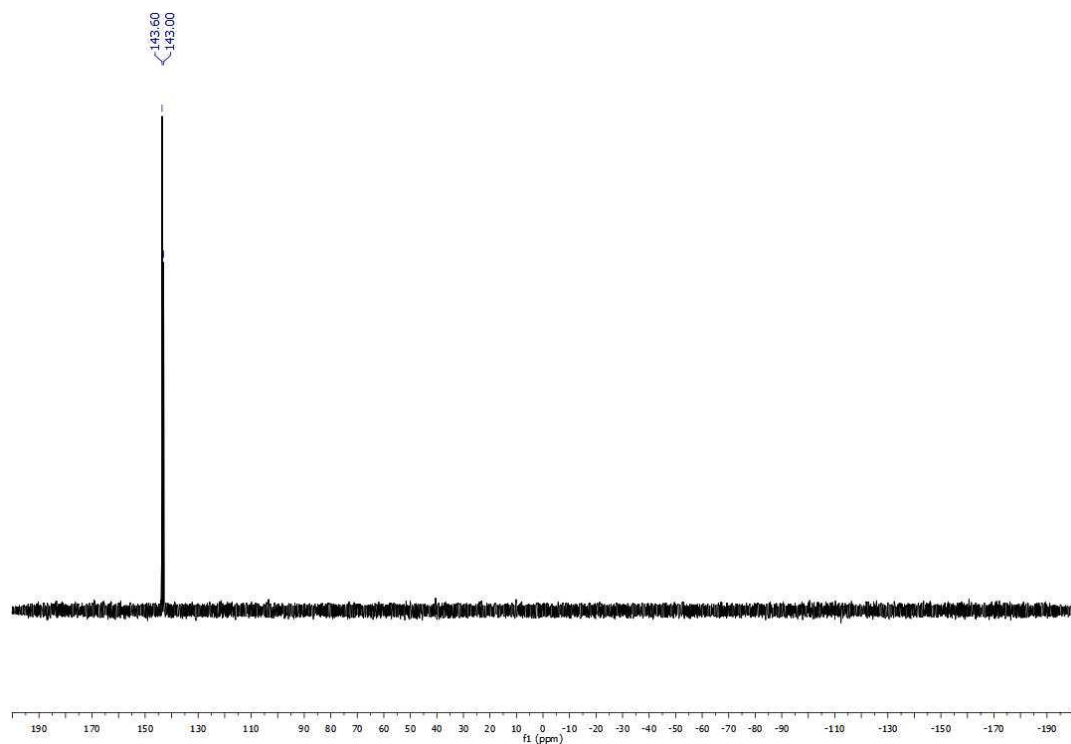

**Figure S16:**  $^1\text{H}$  ( $\text{CDCl}_3$ , 400 MHz),  $^{13}\text{C}$  ( $\text{CDCl}_3$ , 100 MHz) and  $^{31}\text{P}$  NMR ( $\text{CDCl}_3$ , 122 MHz) spectrum of **13**

**Crystal-Structure Determination.** – A colorless crystals of  $C_{13}H_{16}N_2O_5$  (**8**),  $C_{12}H_{14}N_2O$  (**11 $\beta$** ) and  $C_{13}H_{16}N_2O_5$  (**tc-T**) were mounted in air and used for X-ray structure determination at 173K. All measurements were made on an *Oxford Diffraction SuperNova* area-detector diffractometer using mirror optics monochromated Mo  $K\alpha$  radiation ( $\lambda = 0.71073 \text{ \AA}$ ) and Al filtered. The unit cell constants and an orientation matrix for data collection were obtained from a least-squares refinement of the setting angles of reflections in the ranges  $2^\circ < \theta < 27.2^\circ$  (**8**),  $2^\circ < \theta < 30^\circ$  (**11 $\beta$** ) and  $1.9^\circ < \theta < 25.0^\circ$  (**tc-T**). A total of 1088, frames were collected using  $\omega$  scans, with 5+5 seconds exposure time, a rotation angle of  $1.0^\circ$  per frame for compound **8**, 1035 frames were collected using  $\omega$  scans, with 10+10 seconds exposure time for compound **11 $\beta$**  and 1208 frames were collected using  $\omega$  scans, with 30+30 seconds exposure time for compound **tc-T**, a rotation angle of  $0.5^\circ$  per frame, a crystal-detector distance of 65.0 mm, at  $T = 173(2) \text{ K}$ .

Data reduction was performed using the *CrysAlisPro* program. The intensities were corrected for Lorentz and polarization effects, and an absorption correction based on the multi-scan method using SCALE3 ABSPACK in *CrysAlisPro* was applied. Data collection and refinement parameters are given bellow.

The structures were solved by direct methods using *SHELXS-97*, which revealed the positions of all non-hydrogen atoms of title compounds. The non-hydrogen atoms were refined anisotropically. All H-atoms were placed in geometrically calculated positions and refined using a riding model where each H-atom was assigned a fixed isotropic displacement parameter with a value equal to 1.2Ueq of its parent atom (1.5Ueq for the methyl groups).

Refinement of the structure was carried out on  $F^2$  using full-matrix least-squares procedures, which minimized the function  $\sum w(F_o^2 - F_c^2)^2$ . The weighting scheme was based on counting statistics and included a factor to downweight the intense reflections.

All calculations were performed using the *SHELXL-97* program.

**Compound 8:** The data did not allow assignment of absolute configuration, which was assigned based on the knowledge of the parent compound. Friedel pairs were then merged before the refinement.

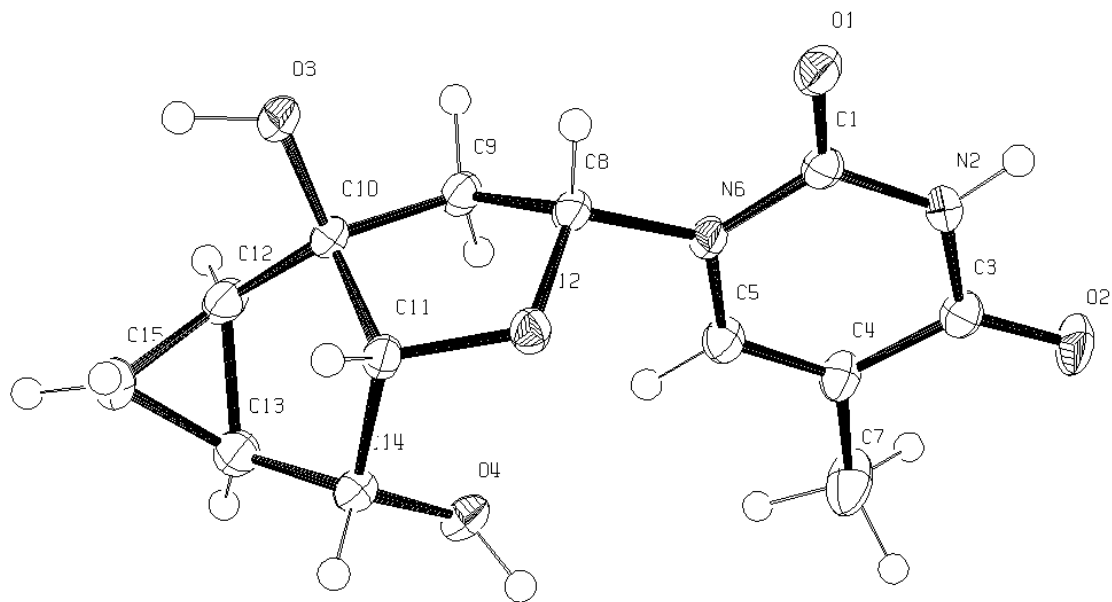

**Figure S17:** ORTEP view of compound **8** with labeling.

**Table S1** - Crystal Data and Details of the Structure Determination  
for: **8** in P2(1)

| Crystal Data             |           |                 |             |
|--------------------------|-----------|-----------------|-------------|
| Formula                  |           | C13             | H16 N2 O5   |
| Formula Weight           |           |                 | 280.28      |
| Crystal System           |           |                 | Monoclinic  |
| Space group              |           | P2 <sub>1</sub> | (No. 4)     |
| a, b, c [Angstrom]       | 9.7669(4) | 6.8089(3)       | 9.9511(4)   |
| alpha, beta, gamma [deg] | 90        | 110.324(5)      | 90          |
| V [Ang**3]               |           |                 | 620.57(5)   |
| Z                        |           |                 | 2           |
| D(calc) [g/cm**3]        |           |                 | 1.500       |
| Mu(MoKa) [ /mm ]         |           |                 | 0.116       |
| F(000)                   |           |                 | 296         |
| Crystal Size [mm]        |           | 0.40 x          | 0.15 x 0.08 |

| Data Collection                     |          |        |                  |
|-------------------------------------|----------|--------|------------------|
| Temperature (K)                     |          |        | 173              |
| Radiation [Angstrom]                | MoKa     |        | 0.71073          |
| Theta Min-Max [Deg]                 |          |        | 2.0, 26.7        |
| Dataset                             | 12:-12 ; | 8:-8 ; | 12:-12           |
| Tot., Uniq. Data, R(int)            | 9679,    | 1394,  | 0.000            |
| Observed data [I > 2.0 sigma(I)]    |          |        | 1324             |
| Refinement                          |          |        |                  |
| Nref, Npar                          |          |        | 1394, 196        |
| R, wR2, S                           |          |        | 3.44, 7.77, 1.06 |
| R, wR2 (I > 2 sigma(I))             |          |        | 3.17, 7.49       |
| Max. and Av. Shift/Error            |          |        | 0.01, 0.001      |
| Min. and Max. Resd. Dens. [e/Ang^3] |          |        | 0.19, -0.22      |

**Table S2** - Final Coordinates and Equivalent Isotropic Displacement  
Parameters of the non-Hydrogen atoms for: **8** in P2(1)

| Atom | x            | y         | z            | U(eq) [Ang^2] |
|------|--------------|-----------|--------------|---------------|
| ---- | ---          | ---       | ---          | -----         |
| O1   | 0.02923(18)  | 1.0259(3) | 0.10145(17)  | 0.0251(5)     |
| O2   | -0.38533(17) | 0.7029(3) | -0.14771(17) | 0.0298(5)     |
| O3   | 0.38044(17)  | 0.7586(3) | 0.57982(17)  | 0.0254(5)     |
| O4   | 0.10124(16)  | 0.2408(3) | 0.35014(17)  | 0.0240(5)     |
| O12  | 0.21261(16)  | 0.5775(3) | 0.27657(15)  | 0.0194(5)     |
| N2   | -0.1807(2)   | 0.8644(3) | -0.01342(19) | 0.0201(5)     |
| N6   | -0.01613(18) | 0.7348(3) | 0.19546(18)  | 0.0179(5)     |
| C1   | -0.0494(2)   | 0.8834(4) | 0.0950(2)    | 0.0181(6)     |
| C3   | -0.2770(2)   | 0.7070(4) | -0.0382(2)   | 0.0205(6)     |
| C4   | -0.2377(2)   | 0.5585(4) | 0.0727(2)    | 0.0226(7)     |
| C5   | -0.1095(2)   | 0.5764(4) | 0.1803(2)    | 0.0207(6)     |
| C7   | -0.3343(3)   | 0.3827(4) | 0.0580(3)    | 0.0394(9)     |
| C8   | 0.1281(2)    | 0.7322(4) | 0.3085(2)    | 0.0181(6)     |
| C9   | 0.1281(2)    | 0.6888(4) | 0.4587(2)    | 0.0200(6)     |
| C10  | 0.2795(2)    | 0.5992(4) | 0.5326(2)    | 0.0182(6)     |
| C11  | 0.3017(2)    | 0.4838(4) | 0.4074(2)    | 0.0180(6)     |
| C12  | 0.2906(3)    | 0.4483(4) | 0.6458(2)    | 0.0237(7)     |
| C13  | 0.2822(3)    | 0.2468(4) | 0.5795(3)    | 0.0251(7)     |
| C14  | 0.2546(2)    | 0.2693(4) | 0.4217(2)    | 0.0210(7)     |
| C15  | 0.4236(3)    | 0.3191(4) | 0.6830(3)    | 0.0315(8)     |

U(eq) = 1/3 of the trace of the orthogonalized U Tensor

**Table S3** - Hydrogen Atom Positions and Isotropic Displacement  
Parameters for: **8** in P2(1)

| Atom | x        | y        | z          | U(iso) [Ang^2] |
|------|----------|----------|------------|----------------|
| ---- | ---      | ---      | ---        | -----          |
| H2   | -0.20727 | 0.96269  | -0.07442   | 0.0241         |
| H3   | 0.455(2) | 0.724(5) | 0.6675(15) | 0.0300         |

|      |             |          |             |        |
|------|-------------|----------|-------------|--------|
| H4   | 0.089(3)    | 0.183(4) | 0.2600(15)  | 0.0300 |
| H5   | -0.08098    | 0.47489  | 0.25005     | 0.0249 |
| H7A  | -0.304(2)   | 0.296(3) | 0.1547(14)  | 0.0300 |
| H7B  | -0.4445(12) | 0.436(4) | 0.0343(17)  | 0.0300 |
| H7C  | -0.331(2)   | 0.291(3) | -0.0293(13) | 0.0300 |
| H8   | 0.17767     | 0.86086  | 0.30919     | 0.0216 |
| H9A  | 0.04990     | 0.59471  | 0.45606     | 0.0240 |
| H9B  | 0.11542     | 0.81049  | 0.50759     | 0.0240 |
| H11  | 0.40675     | 0.48769  | 0.41585     | 0.0216 |
| H12  | 0.24294     | 0.47270  | 0.71840     | 0.0284 |
| H13  | 0.22963     | 0.14033  | 0.61112     | 0.0301 |
| H14  | 0.31305     | 0.17295  | 0.38809     | 0.0252 |
| H15A | 0.50087     | 0.35617  | 0.64450     | 0.0378 |
| H15B | 0.45956     | 0.25904  | 0.77956     | 0.0378 |

=====  
The Temperature Factor has the Form of  $\text{Exp}(-T)$  Where  
 $T = 8 * (\text{Pi}^{**2}) * U * (\text{Sin}(\text{Theta}) / \text{Lambda})^{**2}$  for Isotropic Atoms

**Table S4** - (An)isotropic Displacement Parameters for: **8** in P2(1)

| Atom | U(1,1) or U | U(2,2)     | U(3,3)     | U(2,3)      | U(1,3)      | U(1,2)      |
|------|-------------|------------|------------|-------------|-------------|-------------|
| ---- | -----       | -----      | -----      | -----       | -----       | -----       |
| O1   | 0.0298(8)   | 0.0241(10) | 0.0185(8)  | 0.0001(7)   | 0.0046(7)   | -0.0083(8)  |
| O2   | 0.0200(8)   | 0.0399(12) | 0.0206(8)  | 0.0035(8)   | -0.0042(6)  | -0.0028(8)  |
| O3   | 0.0239(8)   | 0.0203(10) | 0.0227(8)  | -0.0011(8)  | -0.0037(7)  | -0.0046(8)  |
| O4   | 0.0224(8)   | 0.0252(10) | 0.0218(8)  | -0.0068(8)  | 0.0044(7)   | -0.0058(8)  |
| O12  | 0.0207(8)   | 0.0224(9)  | 0.0146(7)  | -0.0005(7)  | 0.0056(6)   | 0.0047(7)   |
| N2   | 0.0208(9)   | 0.0203(10) | 0.0164(9)  | 0.0031(8)   | 0.0029(8)   | 0.0024(8)   |
| N6   | 0.0158(8)   | 0.0188(10) | 0.0157(9)  | -0.0004(9)  | 0.0013(7)   | -0.0023(9)  |
| C1   | 0.0216(10)  | 0.0186(12) | 0.0150(10) | -0.0014(10) | 0.0074(8)   | 0.0000(10)  |
| C3   | 0.0164(10)  | 0.0248(13) | 0.0196(10) | -0.0011(10) | 0.0055(8)   | -0.0008(10) |
| C4   | 0.0192(10)  | 0.0280(14) | 0.0184(11) | 0.0006(10)  | 0.0037(9)   | -0.0038(10) |
| C5   | 0.0223(11)  | 0.0217(12) | 0.0178(10) | 0.0017(10)  | 0.0066(9)   | -0.0034(10) |
| C7   | 0.0358(14)  | 0.0434(19) | 0.0283(13) | 0.0076(14)  | -0.0023(11) | -0.0208(15) |
| C8   | 0.0151(9)   | 0.0193(12) | 0.0168(10) | -0.0027(10) | 0.0018(8)   | -0.0001(10) |
| C9   | 0.0193(10)  | 0.0237(13) | 0.0158(10) | -0.0036(10) | 0.0045(8)   | 0.0011(10)  |
| C10  | 0.0152(10)  | 0.0182(12) | 0.0176(11) | -0.0022(9)  | 0.0011(8)   | -0.0024(9)  |
| C11  | 0.0170(10)  | 0.0196(12) | 0.0153(10) | -0.0001(9)  | 0.0029(8)   | -0.0006(9)  |
| C12  | 0.0290(12)  | 0.0233(14) | 0.0163(11) | -0.0023(10) | 0.0048(9)   | -0.0042(10) |
| C13  | 0.0300(12)  | 0.0204(12) | 0.0217(11) | 0.0016(11)  | 0.0051(10)  | -0.0024(12) |
| C14  | 0.0204(11)  | 0.0204(13) | 0.0196(11) | -0.0033(10) | 0.0037(9)   | -0.0009(10) |
| C15  | 0.0351(14)  | 0.0251(15) | 0.0233(12) | 0.0025(11)  | -0.0038(11) | 0.0013(12)  |

=====  
The Temperature Factor has the Form of  $\text{Exp}(-T)$  Where  
 $T = 8 * (\text{Pi}^{**2}) * U * (\text{Sin}(\text{Theta}) / \text{Lambda})^{**2}$  for Isotropic Atoms  
 $T = 2 * (\text{Pi}^{**2}) * \text{Sum}_{ij} (h(i) * h(j) * U(i,j) * \text{Astar}(i) * \text{Astar}(j))$ , for  
Anisotropic Atoms. Astar(i) are Reciprocal Axial Lengths and  
h(i) are the Reflection Indices.

**Table S5** - Bond Distances (Angstrom) for: **8** in P2(1)

|     |      |            |     |       |            |
|-----|------|------------|-----|-------|------------|
| O1  | -C1  | 1.225 (3)  | C10 | -C12  | 1.501 (3)  |
| O2  | -C3  | 1.228 (3)  | C11 | -C14  | 1.553 (4)  |
| O3  | -C10 | 1.431 (3)  | C12 | -C13  | 1.512 (4)  |
| O4  | -C14 | 1.431 (3)  | C12 | -C15  | 1.505 (4)  |
| O12 | -C8  | 1.440 (3)  | C13 | -C14  | 1.506 (3)  |
| O12 | -C11 | 1.440 (3)  | C13 | -C15  | 1.491 (4)  |
| O3  | -H3  | 0.952 (17) | C5  | -H5   | 0.9500     |
| O4  | -H4  | 0.948 (18) | C7  | -H7A  | 1.079 (16) |
| N2  | -C3  | 1.390 (3)  | C7  | -H7B  | 1.081 (16) |
| N2  | -C1  | 1.365 (3)  | C7  | -H7C  | 1.079 (16) |
| N6  | -C8  | 1.466 (3)  | C8  | -H8   | 1.0000     |
| N6  | -C5  | 1.386 (3)  | C9  | -H9A  | 0.9900     |
| N6  | -C1  | 1.380 (3)  | C9  | -H9B  | 0.9900     |
| N2  | -H2  | 0.8800     | C11 | -H11  | 1.0000     |
| C3  | -C4  | 1.447 (3)  | C12 | -H12  | 1.0000     |
| C4  | -C5  | 1.341 (3)  | C13 | -H13  | 1.0000     |
| C4  | -C7  | 1.500 (4)  | C14 | -H14  | 1.0000     |
| C8  | -C9  | 1.524 (3)  | C15 | -H15A | 0.9900     |
| C9  | -C10 | 1.531 (3)  | C15 | -H15B | 0.9900     |
| C10 | -C11 | 1.551 (3)  |     |       |            |

**Table S6** - Bond Angles (Degrees) for: **8** in P2(1)

|     |      |      |             |     |      |      |             |
|-----|------|------|-------------|-----|------|------|-------------|
| C8  | -O12 | -C11 | 109.72 (15) | C11 | -C10 | -C12 | 105.2 (2)   |
| C10 | -O3  | -H3  | 109.5 (19)  | C10 | -C11 | -C14 | 105.93 (17) |
| C14 | -O4  | -H4  | 107.1 (18)  | O12 | -C11 | -C10 | 107.03 (19) |
| C1  | -N2  | -C3  | 127.2 (2)   | O12 | -C11 | -C14 | 113.24 (17) |
| C1  | -N6  | -C8  | 119.12 (19) | C10 | -C12 | -C15 | 114.6 (2)   |
| C1  | -N6  | -C5  | 120.75 (18) | C13 | -C12 | -C15 | 59.22 (19)  |
| C5  | -N6  | -C8  | 119.64 (19) | C10 | -C12 | -C13 | 108.36 (19) |
| C1  | -N2  | -H2  | 116.00      | C12 | -C13 | -C14 | 109.0 (2)   |
| C3  | -N2  | -H2  | 116.00      | C12 | -C13 | -C15 | 60.14 (18)  |
| O1  | -C1  | -N2  | 121.1 (2)   | C14 | -C13 | -C15 | 118.3 (2)   |
| O1  | -C1  | -N6  | 123.87 (19) | O4  | -C14 | -C13 | 106.41 (19) |
| N2  | -C1  | -N6  | 115.0 (2)   | C11 | -C14 | -C13 | 103.88 (19) |
| N2  | -C3  | -C4  | 114.81 (18) | O4  | -C14 | -C11 | 111.98 (19) |
| O2  | -C3  | -C4  | 125.4 (2)   | C12 | -C15 | -C13 | 60.64 (19)  |
| O2  | -C3  | -N2  | 119.8 (2)   | N6  | -C5  | -H5  | 118.00      |
| C3  | -C4  | -C7  | 119.49 (19) | C4  | -C5  | -H5  | 118.00      |
| C5  | -C4  | -C7  | 122.1 (2)   | C4  | -C7  | -H7A | 112.4 (10)  |
| C3  | -C4  | -C5  | 118.2 (2)   | C4  | -C7  | -H7B | 107.4 (14)  |
| N6  | -C5  | -C4  | 123.7 (2)   | C4  | -C7  | -H7C | 110.3 (11)  |
| O12 | -C8  | -N6  | 108.13 (17) | H7A | -C7  | -H7B | 108.8 (15)  |
| O12 | -C8  | -C9  | 105.66 (19) | H7A | -C7  | -H7C | 109.0 (14)  |
| N6  | -C8  | -C9  | 115.32 (17) | H7B | -C7  | -H7C | 108.9 (14)  |



|     |      |      |            |      |      |       |        |
|-----|------|------|------------|------|------|-------|--------|
| C8  | -C9  | -C10 | 102.67(16) | O12  | -C8  | -H8   | 109.00 |
| O3  | -C10 | -C11 | 112.05(17) | N6   | -C8  | -H8   | 109.00 |
| O3  | -C10 | -C12 | 114.26(17) | C9   | -C8  | -H8   | 109.00 |
| C9  | -C10 | -C11 | 101.38(15) | C8   | -C9  | -H9A  | 111.00 |
| O3  | -C10 | -C9  | 107.2(2)   | C8   | -C9  | -H9B  | 111.00 |
| C9  | -C10 | -C12 | 116.1(2)   | C10  | -C9  | -H9A  | 111.00 |
| C10 | -C9  | -H9B | 111.00     | C15  | -C13 | -H13  | 118.00 |
| H9A | -C9  | -H9B | 109.00     | O4   | -C14 | -H14  | 111.00 |
| O12 | -C11 | -H11 | 110.00     | C11  | -C14 | -H14  | 111.00 |
| C10 | -C11 | -H11 | 110.00     | C13  | -C14 | -H14  | 111.00 |
| C14 | -C11 | -H11 | 110.00     | C12  | -C15 | -H15A | 118.00 |
| C10 | -C12 | -H12 | 120.00     | C12  | -C15 | -H15B | 118.00 |
| C13 | -C12 | -H12 | 120.00     | C13  | -C15 | -H15A | 118.00 |
| C15 | -C12 | -H12 | 120.00     | C13  | -C15 | -H15B | 118.00 |
| C12 | -C13 | -H13 | 118.00     | H15A | -C15 | -H15B | 115.00 |
| C14 | -C13 | -H13 | 118.00     |      |      |       |        |

Table S7 - Torsion Angles (Degrees) for: **8** in P2(1)

|     |      |      |      |             |
|-----|------|------|------|-------------|
| C8  | -O12 | -C11 | -C14 | 112.0(2)    |
| C11 | -O12 | -C8  | -N6  | -142.76(18) |
| C11 | -O12 | -C8  | -C9  | -18.8(2)    |
| C8  | -O12 | -C11 | -C10 | -4.4(2)     |
| C3  | -N2  | -C1  | -O1  | 176.4(2)    |
| C1  | -N2  | -C3  | -C4  | 6.6(3)      |
| C1  | -N2  | -C3  | -O2  | -173.5(2)   |
| C3  | -N2  | -C1  | -N6  | -5.1(3)     |
| C8  | -N6  | -C1  | -N2  | 174.35(19)  |
| C8  | -N6  | -C1  | -O1  | -7.3(3)     |
| C5  | -N6  | -C1  | -N2  | 2.5(3)      |
| C1  | -N6  | -C8  | -O12 | -106.4(2)   |
| C5  | -N6  | -C8  | -O12 | 65.6(2)     |
| C5  | -N6  | -C1  | -O1  | -179.2(2)   |
| C1  | -N6  | -C5  | -C4  | -2.1(3)     |
| C8  | -N6  | -C5  | -C4  | -174.0(2)   |
| C1  | -N6  | -C8  | -C9  | 135.7(2)    |
| C5  | -N6  | -C8  | -C9  | -52.4(3)    |
| N2  | -C3  | -C4  | -C5  | -5.5(3)     |
| O2  | -C3  | -C4  | -C7  | -0.4(4)     |
| N2  | -C3  | -C4  | -C7  | 179.5(2)    |
| O2  | -C3  | -C4  | -C5  | 174.7(2)    |
| C7  | -C4  | -C5  | -N6  | 178.6(2)    |
| C3  | -C4  | -C5  | -N6  | 3.7(3)      |
| N6  | -C8  | -C9  | -C10 | 153.6(2)    |
| O12 | -C8  | -C9  | -C10 | 34.2(2)     |
| C8  | -C9  | -C10 | -C12 | -148.6(2)   |
| C8  | -C9  | -C10 | -C11 | -35.3(2)    |

|     |      |      |      |             |
|-----|------|------|------|-------------|
| C8  | -C9  | -C10 | -O3  | 82.3(2)     |
| O3  | -C10 | -C11 | -C14 | 150.07(18)  |
| O3  | -C10 | -C11 | -O12 | -88.8(2)    |
| C12 | -C10 | -C11 | -O12 | 146.45(19)  |
| C9  | -C10 | -C11 | -O12 | 25.2(2)     |
| C9  | -C10 | -C11 | -C14 | -95.9(2)    |
| O3  | -C10 | -C12 | -C15 | -72.8(3)    |
| C9  | -C10 | -C12 | -C13 | 97.9(3)     |
| C9  | -C10 | -C12 | -C15 | 161.7(2)    |
| C11 | -C10 | -C12 | -C13 | -13.3(3)    |
| C11 | -C10 | -C12 | -C15 | 50.6(2)     |
| C12 | -C10 | -C11 | -C14 | 25.4(2)     |
| O3  | -C10 | -C12 | -C13 | -136.6(2)   |
| O12 | -C11 | -C14 | -O4  | -30.1(2)    |
| O12 | -C11 | -C14 | -C13 | -144.54(19) |
| C10 | -C11 | -C14 | -O4  | 86.88(19)   |
| C10 | -C11 | -C14 | -C13 | -27.5(2)    |
| C10 | -C12 | -C13 | -C14 | -4.2(3)     |
| C10 | -C12 | -C13 | -C15 | 108.2(3)    |
| C15 | -C12 | -C13 | -C14 | -112.4(3)   |
| C10 | -C12 | -C15 | -C13 | -97.5(2)    |
| C12 | -C13 | -C14 | -O4  | -98.7(3)    |
| C12 | -C13 | -C14 | -C11 | 19.7(3)     |
| C15 | -C13 | -C14 | -O4  | -164.3(2)   |
| C15 | -C13 | -C14 | -C11 | -46.0(3)    |
| C14 | -C13 | -C15 | -C12 | 96.7(3)     |

**Table S8** - Contact Distances(Angstrom) for: **8** in P2(1)

|     |        |          |     |        |          |
|-----|--------|----------|-----|--------|----------|
| O1  | .O4_a  | 2.748(2) | O3  | .H11_f | 2.5900   |
| O1  | .C5_b  | 3.181(3) | O4  | .H9A   | 2.7500   |
| O1  | .C1_b  | 3.171(3) | O4  | .H8_g  | 2.7600   |
| O1  | .N2_b  | 3.028(3) | O4  | .H5    | 2.3400   |
| O1  | .N6_b  | 3.241(2) | O12 | .H5    | 2.8700   |
| O1  | .C3_b  | 2.972(3) | O12 | .H2_h  | 2.1400   |
| O1  | .C4_b  | 3.106(3) | N2  | .O1_h  | 3.028(3) |
| O2  | .O3_c  | 2.902(2) | N2  | .O12_b | 2.914(2) |
| O2  | .C14_b | 3.419(3) | N6  | .O1_h  | 3.241(2) |
| O2  | .C15_c | 3.312(3) | C1  | .O1_h  | 3.171(3) |
| O2  | .C7_d  | 3.390(4) | C3  | .O1_h  | 2.972(3) |
| O3  | .O2_e  | 2.902(2) | C4  | .O1_h  | 3.106(3) |
| O3  | .O12   | 3.143(2) | C5  | .C13_i | 3.564(4) |
| O4  | .C9    | 3.216(3) | C5  | .O4    | 3.146(3) |
| O4  | .O12   | 2.744(3) | C5  | .O1_h  | 3.181(3) |
| O4  | .O1_g  | 2.748(2) | C7  | .O2_j  | 3.390(4) |
| O4  | .C5    | 3.146(3) | C8  | .O4    | 3.393(3) |
| O4  | .C8    | 3.393(3) | C9  | .O4    | 3.216(3) |
| O12 | .N2_h  | 2.914(2) | C13 | .C5_k  | 3.564(4) |

|      |        |            |      |         |            |
|------|--------|------------|------|---------|------------|
| O12  | .O4    | 2.744 (3)  | C14  | .O2_h   | 3.419 (3)  |
| O12  | .O3    | 3.143 (2)  | C15  | .O2_e   | 3.312 (3)  |
| O1   | .H8    | 2.3600     | C1   | .H4_a   | 2.67 (2)   |
| O1   | .H4_a  | 1.83 (2)   | C5   | .H13_i  | 2.7500     |
| O2   | .H14_b | 2.7300     | C5   | .H9A    | 2.6500     |
| O2   | .H7B   | 2.77 (2)   | C7   | .H15B_c | 2.9300     |
| O2   | .H3_c  | 1.960 (16) | C9   | .H5     | 2.7700     |
| O2   | .H7B_d | 2.803 (19) | C11  | .H15A   | 2.6300     |
| O3   | .H8    | 2.8200     | C12  | .H7A_i  | 3.063 (18) |
| C14  | .H9A   | 3.0800     | H7C  | .H15B_c | 2.2700     |
| C14  | .H8_g  | 2.9900     | H8   | .O1     | 2.3600     |
| C15  | .H3    | 2.78 (3)   | H8   | .O3     | 2.8200     |
| C15  | .H7C_e | 3.035 (15) | H8   | .O4_a   | 2.7600     |
| C15  | .H11   | 2.8500     | H8   | .C14_a  | 2.9900     |
| H2   | .O12_b | 2.1400     | H8   | .H4_a   | 2.3500     |
| H3   | .O2_e  | 1.960 (16) | H8   | .H14_a  | 2.4800     |
| H3   | .C15   | 2.78 (3)   | H9A  | .O4     | 2.7500     |
| H3   | .H15A  | 2.5700     | H9A  | .C5     | 2.6500     |
| H3   | .H11_f | 2.5500     | H9A  | .C14    | 3.0800     |
| H3   | .H14_f | 2.5400     | H9A  | .H5     | 2.1600     |
| H4   | .O1_g  | 1.83 (2)   | H9A  | .H13_i  | 2.5900     |
| H4   | .C1_g  | 2.67 (2)   | H9B  | .H13_a  | 2.5600     |
| H4   | .H5    | 2.5700     | H11  | .C15    | 2.8500     |
| H4   | .H8_g  | 2.3500     | H11  | .H15A   | 2.3200     |
| H5   | .O4    | 2.3400     | H11  | .O3_l   | 2.5900     |
| H5   | .O12   | 2.8700     | H11  | .H3_l   | 2.5500     |
| H5   | .C9    | 2.7700     | H12  | .H7A_i  | 2.5000     |
| H5   | .H4    | 2.5700     | H13  | .H9B_g  | 2.5600     |
| H5   | .H7A   | 2.3900     | H13  | .C5_k   | 2.7500     |
| H5   | .H9A   | 2.1600     | H13  | .H5_k   | 2.5800     |
| H5   | .H13_i | 2.5800     | H13  | .H9A_k  | 2.5900     |
| H7A  | .H5    | 2.3900     | H14  | .H8_g   | 2.4800     |
| H7A  | .C12_k | 3.063 (18) | H14  | .O2_h   | 2.7300     |
| H7A  | .H12_k | 2.5000     | H14  | .H3_l   | 2.5400     |
| H7B  | .O2    | 2.77 (2)   | H15A | .C11    | 2.6300     |
| H7B  | .O2_j  | 2.803 (19) | H15A | .H3     | 2.5700     |
| H7C  | .C15_c | 3.035 (15) | H15A | .H11    | 2.3200     |
| H15B | .C7_e  | 2.9300     | H15B | .H7C_e  | 2.2700     |

**Table S9** - Hydrogen Bonds (Angstrom, Deg) for: **8** in P2(1)

|     |        |        |            |            |           |         |       |
|-----|--------|--------|------------|------------|-----------|---------|-------|
| N2  | -- H2  | .. O12 | 0.8800     | 2.1400     | 2.914 (2) | 146.00  | 2_555 |
| O3  | -- H3  | .. O2  | 0.952 (17) | 1.960 (16) | 2.902 (2) | 170 (3) | 1_656 |
| O4  | -- H4  | .. O1  | 0.948 (18) | 1.83 (2)   | 2.748 (2) | 163 (3) | 1_545 |
| C5  | -- H5  | .. O4  | 0.9500     | 2.3400     | 3.146 (3) | 143.00  | .     |
| C8  | -- H8  | .. O1  | 1.0000     | 2.3600     | 2.792 (3) | 105.00  | .     |
| C11 | -- H11 | .. O3  | 1.0000     | 2.5900     | 3.425 (3) | 141.00  | 2_646 |

Translation of Symmetry Code to Equiv.Pos

a = [ 1565.00 ] = x, 1+y, z  
b = [ 2555.00 ] = -x, 1/2+y, -z  
c = [ 1454.00 ] = -1+x, y, -1+z  
d = [ 2455.00 ] = -1-x, 1/2+y, -z  
e = [ 1656.00 ] = 1+x, y, 1+z  
f = [ 2656.00 ] = 1-x, 1/2+y, 1-z  
g = [ 1545.00 ] = x, -1+y, z  
h = [ 2545.00 ] = -x, -1/2+y, -z  
i = [ 2556.00 ] = -x, 1/2+y, 1-z  
j = [ 2445.00 ] = -1-x, -1/2+y, -z  
k = [ 2546.00 ] = -x, -1/2+y, 1-z  
l = [ 2646.00 ] = 1-x, -1/2+y, 1-z

**Compound 11 $\beta$** : The crystal space group type is chiral, only one molecule crystallize in the unit cell. Absolute configuration cannot be unambiguously determined from X-ray data (Flack parameter -0.0(9)), therefore it is assigned based on the known stereochemistry of the reactant.

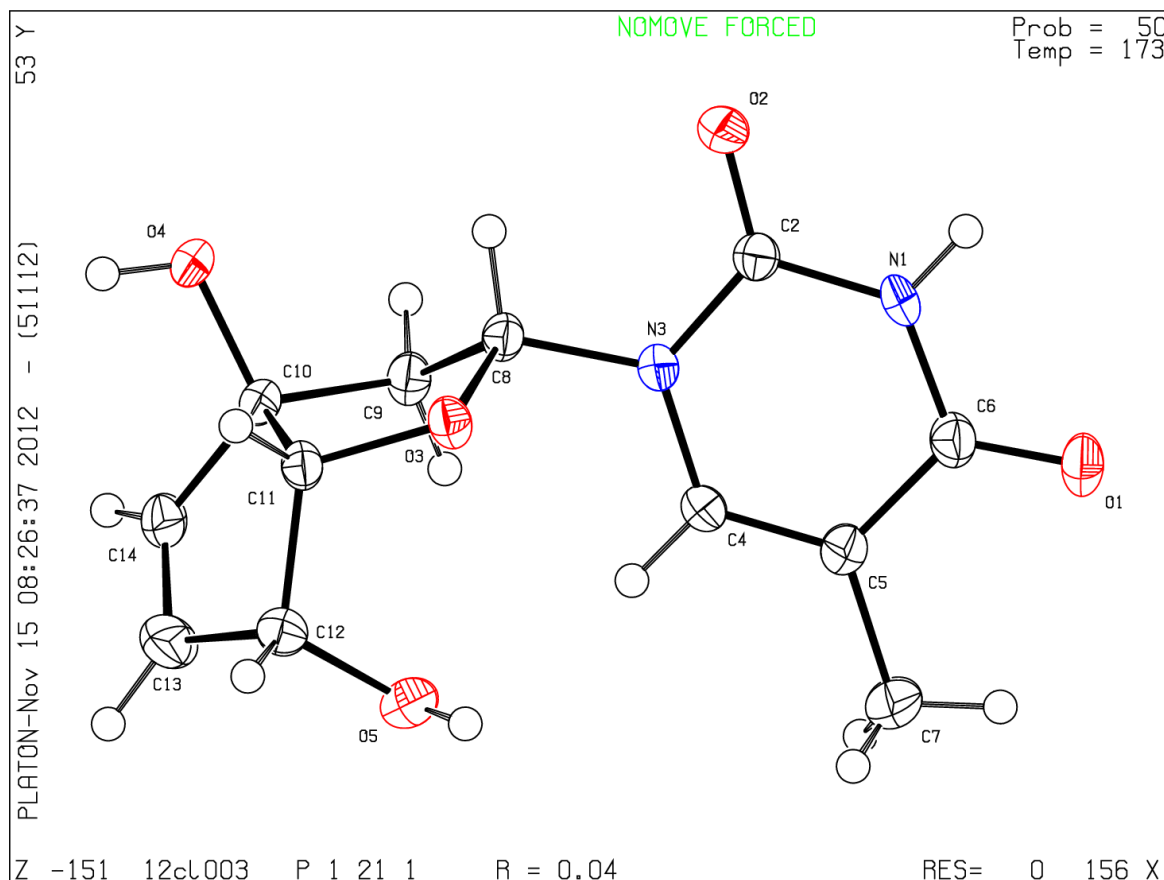

**Figure S18:** ORTEP view of compound **11 $\beta$**  with labeling.

**Table S10** - Crystal Data and Details of the Structure Determination

for: **11 $\beta$**  P 1 21 1 R = 0.04

| Crystal Data             |           | C12        | H14        | N2 | O5         |
|--------------------------|-----------|------------|------------|----|------------|
| Formula                  |           |            |            |    |            |
| Formula Weight           |           |            |            |    | 266.25     |
| Crystal System           |           |            |            |    | Monoclinic |
| Space group              |           | P21        |            |    | (No. 4)    |
| a, b, c [Angstrom]       | 9.6135(2) | 6.7389(1)  | 10.0548(2) |    |            |
| alpha, beta, gamma [deg] | 90        | 111.785(3) | 90         |    |            |
| V [Ang**3]               |           |            | 604.87(2)  |    |            |
| Z                        |           |            |            |    | 2          |

|                                                                    |                           |             |
|--------------------------------------------------------------------|---------------------------|-------------|
| D(calc) [g/cm**3]                                                  |                           | 1.462       |
| Mu(MoKa) [ /mm ]                                                   |                           | 0.115       |
| F(000)                                                             |                           | 280         |
| Crystal Size [mm]                                                  | 0.09 x 0.14 x 0.68        |             |
| Data Collection                                                    |                           |             |
| Temperature (K)                                                    |                           | 173         |
| Radiation [Angstrom]                                               | MoKa                      | 0.71069     |
| Theta Min-Max [Deg]                                                |                           | 2.2, 26.7   |
| Dataset                                                            | -11: 12 ; -8: 8 ; -12: 11 |             |
| Tot., Uniq. Data, R(int)                                           | 8853, 2358, 0.023         |             |
| Observed data [I > 0.0 sigma(I)]                                   |                           | 2256        |
| Refinement                                                         |                           |             |
| Nref, Npar                                                         |                           | 2358, 174   |
| R, wR2, S                                                          | 0.0351, 0.0934, 1.05      |             |
| w = 1/[\s^2^(Fo^2^)+(0.0483P)^2^+0.2494P] where P=(Fo^2^+2Fc^2^)/3 |                           |             |
| Max. and Av. Shift/Error                                           |                           | 0.00, 0.00  |
| Flack x                                                            |                           | -0.1(10)    |
| Min. and Max. Resd. Dens. [e/Ang^3]                                |                           | -0.27, 0.32 |

**Table S11** - Final Coordinates and Equivalent Isotropic Displacement

Parameters of the non-Hydrogen atoms

for: **11β** P 1 21 1 R = 0.04

| Atom | x           | y         | z           | U(eq) [Ang^2] |
|------|-------------|-----------|-------------|---------------|
| ---- | ---         | ---       | ---         | -----         |
| O1   | 0.11514(17) | 0.8680(3) | 0.32482(16) | 0.0380(5)     |
| O2   | 0.51115(16) | 1.2267(2) | 0.60733(15) | 0.0273(4)     |
| O3   | 0.70955(14) | 0.7573(2) | 0.78469(13) | 0.0206(4)     |
| O4   | 0.86987(15) | 0.9709(2) | 1.08671(15) | 0.0273(4)     |
| O5   | 0.61283(15) | 0.4162(2) | 0.87397(16) | 0.0275(4)     |
| N1   | 0.30957(18) | 1.0457(3) | 0.47299(17) | 0.0217(5)     |
| N3   | 0.47746(17) | 0.9170(2) | 0.68563(16) | 0.0197(4)     |
| C2   | 0.4395(2)   | 1.0735(3) | 0.5911(2)   | 0.0200(5)     |
| C4   | 0.3878(2)   | 0.7510(3) | 0.6632(2)   | 0.0215(5)     |
| C5   | 0.2609(2)   | 0.7262(3) | 0.5488(2)   | 0.0243(6)     |
| C6   | 0.2199(2)   | 0.8793(3) | 0.4396(2)   | 0.0243(6)     |
| C7   | 0.1645(3)   | 0.5443(4) | 0.5230(3)   | 0.0403(7)     |
| C8   | 0.6226(2)   | 0.9199(3) | 0.80435(19) | 0.0194(5)     |
| C9   | 0.6163(2)   | 0.8905(3) | 0.95188(19) | 0.0212(5)     |
| C10  | 0.7715(2)   | 0.8058(3) | 1.03685(19) | 0.0198(5)     |
| C11  | 0.8033(2)   | 0.6813(3) | 0.92307(19) | 0.0197(5)     |
| C12  | 0.7673(2)   | 0.4646(3) | 0.9482(2)   | 0.0233(5)     |
| C13  | 0.7917(3)   | 0.4693(4) | 1.1055(2)   | 0.0336(7)     |
| C14  | 0.7835(2)   | 0.6533(3) | 1.1513(2)   | 0.0253(6)     |

U(eq) = 1/3 of the trace of the orthogonalized U Tensor

**Table S12** - Hydrogen Atom Positions and Isotropic Displacement

Parameters for: **11β** P 1 21 1 R = 0.04

| Atom | x       | y       | z       | U(iso) [Ang <sup>2</sup> ] |
|------|---------|---------|---------|----------------------------|
| H1   | 0.28080 | 1.14530 | 0.41230 | 0.0260                     |
| H4   | 0.41760 | 0.64830 | 0.73280 | 0.0260                     |
| H4A  | 0.94880 | 0.93390 | 1.15280 | 0.0410                     |
| H5   | 0.59980 | 0.37680 | 0.79090 | 0.0410                     |
| H7A  | 0.07790 | 0.55940 | 0.43330 | 0.0600                     |
| H7B  | 0.12980 | 0.52670 | 0.60250 | 0.0600                     |
| H7C  | 0.22280 | 0.42790 | 0.51660 | 0.0600                     |
| H8   | 0.67500 | 1.04750 | 0.80260 | 0.0230                     |
| H9A  | 0.53630 | 0.79610 | 0.94870 | 0.0250                     |
| H9B  | 0.60000 | 1.01790 | 0.99290 | 0.0250                     |
| H11  | 0.91120 | 0.69350 | 0.93590 | 0.0240                     |
| H12  | 0.83550 | 0.36820 | 0.92710 | 0.0280                     |
| H13  | 0.81050 | 0.35480 | 1.16470 | 0.0400                     |
| H14  | 0.78500 | 0.68460 | 1.24400 | 0.0300                     |

=====  
 The Temperature Factor has the Form of Exp(-T) Where  
 $T = 8 * (\pi^2) * U * (\sin(\theta) / \lambda)^2$  for Isotropic Atoms

**Table S13** - (An)isotropic Displacement Parameters for: **11β** P 1 21 1 R = 0.04

| Atom | U(1,1) or U | U(2,2)      | U(3,3)      | U(2,3)      | U(1,3)       | U(1,2)       |
|------|-------------|-------------|-------------|-------------|--------------|--------------|
| O1   | 0.0292 (8)  | 0.0422 (10) | 0.0275 (8)  | 0.0108 (7)  | -0.0070 (7)  | -0.0074 (7)  |
| O2   | 0.0317 (8)  | 0.0224 (8)  | 0.0233 (7)  | 0.0043 (6)  | 0.0050 (6)   | -0.0050 (6)  |
| O3   | 0.0221 (7)  | 0.0217 (7)  | 0.0163 (6)  | 0.0002 (6)  | 0.0051 (5)   | 0.0044 (6)   |
| O4   | 0.0243 (7)  | 0.0210 (7)  | 0.0255 (7)  | -0.0016 (6) | -0.0036 (6)  | -0.0039 (6)  |
| O5   | 0.0267 (7)  | 0.0244 (8)  | 0.0308 (7)  | -0.0036 (7) | 0.0100 (6)   | -0.0047 (6)  |
| N1   | 0.0218 (8)  | 0.0221 (8)  | 0.0170 (8)  | 0.0066 (7)  | 0.0023 (6)   | 0.0038 (7)   |
| N3   | 0.0198 (8)  | 0.0191 (8)  | 0.0166 (7)  | 0.0015 (6)  | 0.0026 (6)   | 0.0002 (7)   |
| C2   | 0.0212 (9)  | 0.0202 (9)  | 0.0180 (9)  | -0.0002 (7) | 0.0066 (8)   | -0.0003 (8)  |
| C4   | 0.0238 (9)  | 0.0200 (10) | 0.0184 (9)  | 0.0037 (8)  | 0.0052 (7)   | -0.0011 (8)  |
| C5   | 0.0201 (9)  | 0.0251 (11) | 0.0240 (9)  | 0.0020 (8)  | 0.0040 (8)   | -0.0025 (8)  |
| C6   | 0.0190 (9)  | 0.0279 (11) | 0.0233 (10) | 0.0035 (8)  | 0.0047 (8)   | 0.0010 (8)   |
| C7   | 0.0347 (12) | 0.0344 (13) | 0.0397 (13) | 0.0089 (11) | -0.0001 (10) | -0.0157 (11) |
| C8   | 0.0167 (9)  | 0.0195 (9)  | 0.0187 (9)  | -0.0012 (8) | 0.0029 (7)   | 0.0015 (7)   |
| C9   | 0.0196 (9)  | 0.0230 (10) | 0.0184 (9)  | -0.0024 (8) | 0.0040 (7)   | 0.0031 (8)   |
| C10  | 0.0184 (9)  | 0.0189 (10) | 0.0183 (9)  | -0.0018 (7) | 0.0023 (8)   | -0.0013 (7)  |
| C11  | 0.0176 (9)  | 0.0209 (10) | 0.0178 (9)  | 0.0011 (7)  | 0.0034 (7)   | 0.0018 (7)   |
| C12  | 0.0247 (9)  | 0.0189 (9)  | 0.0247 (10) | -0.0003 (8) | 0.0072 (8)   | 0.0016 (8)   |
| C13  | 0.0465 (13) | 0.0261 (11) | 0.0235 (10) | 0.0040 (9)  | 0.0074 (9)   | -0.0026 (10) |
| C14  | 0.0273 (11) | 0.0283 (11) | 0.0164 (10) | 0.0022 (8)  | 0.0036 (8)   | -0.0027 (9)  |

=====  
 The Temperature Factor has the Form of Exp(-T) Where

$T = 8 * (\pi^{**2}) * U * (\sin(\theta) / \lambda)^{**2}$  for Isotropic Atoms  
 $T = 2 * (\pi^{**2}) * \sum_{ij} (h(i) * h(j) * U(i, j) * A^*(i) * A^*(j))$ , for  
 Anisotropic Atoms.  $A^*(i)$  are Reciprocal Axial Lengths and  
 $h(i)$  are the Reflection Indices.

**Table S14** - Bond Distances (Angstrom) for: **11 $\beta$**  P 1 21 1 R = 0.04

|    |      |          |     |      |          |
|----|------|----------|-----|------|----------|
| O1 | -C6  | 1.220(2) | C9  | -C10 | 1.528(3) |
| O2 | -C2  | 1.218(2) | C10 | -C14 | 1.515(3) |
| O3 | -C8  | 1.436(2) | C10 | -C11 | 1.538(3) |
| O3 | -C11 | 1.442(2) | C11 | -C12 | 1.543(3) |
| O4 | -C10 | 1.425(2) | C12 | -C13 | 1.511(3) |
| O5 | -C12 | 1.430(3) | C13 | -C14 | 1.335(3) |
| O4 | -H4A | 0.8400   | C4  | -H4  | 0.9500   |
| O5 | -H5  | 0.8400   | C7  | -H7A | 0.9800   |
| N1 | -C6  | 1.378(3) | C7  | -H7B | 0.9800   |
| N1 | -C2  | 1.380(3) | C7  | -H7C | 0.9800   |
| N3 | -C4  | 1.379(3) | C8  | -H8  | 1.0000   |
| N3 | -C8  | 1.462(2) | C9  | -H9A | 0.9900   |
| N3 | -C2  | 1.375(2) | C9  | -H9B | 0.9900   |
| N1 | -H1  | 0.8800   | C11 | -H11 | 1.0000   |
| C4 | -C5  | 1.341(3) | C12 | -H12 | 1.0000   |
| C5 | -C6  | 1.451(3) | C13 | -H13 | 0.9500   |
| C5 | -C7  | 1.500(3) | C14 | -H14 | 0.9500   |
| C8 | -C9  | 1.520(3) |     |      |          |

**Table S15** - Bond Angles (Degrees) for: **11 $\beta$**  P 1 21 1 R = 0.04

|     |     |      |            |     |      |      |            |
|-----|-----|------|------------|-----|------|------|------------|
| C8  | -O3 | -C11 | 109.00(13) | O4  | -C10 | -C14 | 114.13(15) |
| C10 | -O4 | -H4A | 109.00     | O3  | -C11 | -C10 | 107.36(15) |
| C12 | -O5 | -H5  | 109.00     | O3  | -C11 | -C12 | 113.34(15) |
| C2  | -N1 | -C6  | 127.21(18) | C10 | -C11 | -C12 | 106.01(15) |
| C4  | -N3 | -C8  | 119.59(15) | O5  | -C12 | -C11 | 112.51(16) |
| C2  | -N3 | -C8  | 118.83(16) | C11 | -C12 | -C13 | 101.21(17) |
| C2  | -N3 | -C4  | 121.31(16) | O5  | -C12 | -C13 | 106.19(18) |
| C2  | -N1 | -H1  | 116.00     | C12 | -C13 | -C14 | 112.0(2)   |
| C6  | -N1 | -H1  | 116.00     | C10 | -C14 | -C13 | 111.44(17) |
| N1  | -C2 | -N3  | 114.45(18) | N3  | -C4  | -H4  | 118.00     |
| O2  | -C2 | -N3  | 124.44(18) | C5  | -C4  | -H4  | 118.00     |
| O2  | -C2 | -N1  | 121.10(18) | C5  | -C7  | -H7A | 109.00     |
| N3  | -C4 | -C5  | 123.78(18) | C5  | -C7  | -H7B | 109.00     |
| C4  | -C5 | -C6  | 117.76(18) | C5  | -C7  | -H7C | 109.00     |
| C4  | -C5 | -C7  | 123.9(2)   | H7A | -C7  | -H7B | 109.00     |
| C6  | -C5 | -C7  | 118.26(19) | H7A | -C7  | -H7C | 110.00     |
| O1  | -C6 | -N1  | 120.22(19) | H7B | -C7  | -H7C | 109.00     |
| O1  | -C6 | -C5  | 124.7(2)   | O3  | -C8  | -H8  | 109.00     |
| N1  | -C6 | -C5  | 115.13(17) | N3  | -C8  | -H8  | 109.00     |



|     |      |      |            |     |      |      |        |
|-----|------|------|------------|-----|------|------|--------|
| O3  | -C8  | -C9  | 105.73(15) | C9  | -C8  | -H8  | 109.00 |
| N3  | -C8  | -C9  | 115.07(17) | C8  | -C9  | -H9A | 111.00 |
| O3  | -C8  | -N3  | 107.79(14) | C8  | -C9  | -H9B | 111.00 |
| C8  | -C9  | -C10 | 102.13(16) | C10 | -C9  | -H9A | 111.00 |
| C9  | -C10 | -C11 | 102.14(14) | C10 | -C9  | -H9B | 111.00 |
| C11 | -C10 | -C14 | 102.41(16) | H9A | -C9  | -H9B | 109.00 |
| O4  | -C10 | -C11 | 113.47(16) | O3  | -C11 | -H11 | 110.00 |
| C9  | -C10 | -C14 | 117.47(17) | C10 | -C11 | -H11 | 110.00 |
| O4  | -C10 | -C9  | 106.72(16) | C12 | -C11 | -H11 | 110.00 |
| O5  | -C12 | -H12 | 112.00     | C14 | -C13 | -H13 | 124.00 |
| C11 | -C12 | -H12 | 112.00     | C10 | -C14 | -H14 | 124.00 |
| C13 | -C12 | -H12 | 112.00     | C13 | -C14 | -H14 | 124.00 |
| C12 | -C13 | -H13 | 124.00     |     |      |      |        |

**Table S16** - Torsion Angles (Degrees) for: **11 $\beta$**  P 1 21 1 R = 0.04

|     |      |      |      |             |
|-----|------|------|------|-------------|
| C8  | -O3  | -C11 | -C12 | 116.94(17)  |
| C11 | -O3  | -C8  | -N3  | -146.32(15) |
| C11 | -O3  | -C8  | -C9  | -22.8(2)    |
| C8  | -O3  | -C11 | -C10 | 0.2(2)      |
| C6  | -N1  | -C2  | -O2  | 178.4(2)    |
| C2  | -N1  | -C6  | -O1  | -173.4(2)   |
| C6  | -N1  | -C2  | -N3  | -2.2(3)     |
| C2  | -N1  | -C6  | -C5  | 6.4(3)      |
| C4  | -N3  | -C2  | -N1  | -2.0(3)     |
| C8  | -N3  | -C2  | -O2  | -8.5(3)     |
| C4  | -N3  | -C2  | -O2  | 177.40(19)  |
| C2  | -N3  | -C8  | -O3  | -115.68(18) |
| C4  | -N3  | -C8  | -O3  | 58.6(2)     |
| C2  | -N3  | -C8  | -C9  | 126.65(19)  |
| C8  | -N3  | -C4  | -C5  | -172.58(19) |
| C2  | -N3  | -C4  | -C5  | 1.5(3)      |
| C8  | -N3  | -C2  | -N1  | 172.11(17)  |
| C4  | -N3  | -C8  | -C9  | -59.1(2)    |
| N3  | -C4  | -C5  | -C6  | 2.9(3)      |
| N3  | -C4  | -C5  | -C7  | 179.0(2)    |
| C4  | -C5  | -C6  | -O1  | 173.3(2)    |
| C4  | -C5  | -C6  | -N1  | -6.4(3)     |
| C7  | -C5  | -C6  | -O1  | -2.9(3)     |
| C7  | -C5  | -C6  | -N1  | 177.4(2)    |
| O3  | -C8  | -C9  | -C10 | 35.88(19)   |
| N3  | -C8  | -C9  | -C10 | 154.70(16)  |
| C8  | -C9  | -C10 | -C11 | -34.27(19)  |
| C8  | -C9  | -C10 | -O4  | 85.07(17)   |
| C8  | -C9  | -C10 | -C14 | -145.34(17) |
| O4  | -C10 | -C11 | -C12 | 146.02(16)  |
| O4  | -C10 | -C11 | -O3  | -92.54(18)  |
| C14 | -C10 | -C11 | -O3  | 143.97(16)  |

|     |      |      |      |              |
|-----|------|------|------|--------------|
| C14 | -C10 | -C11 | -C12 | 22.53 (19)   |
| O4  | -C10 | -C14 | -C13 | -133.1 (2)   |
| C9  | -C10 | -C14 | -C13 | 100.9 (2)    |
| C11 | -C10 | -C14 | -C13 | -10.0 (2)    |
| C9  | -C10 | -C11 | -O3  | 21.9 (2)     |
| C9  | -C10 | -C11 | -C12 | -99.51 (17)  |
| O3  | -C11 | -C12 | -O5  | -30.6 (2)    |
| O3  | -C11 | -C12 | -C13 | -143.53 (18) |
| C10 | -C11 | -C12 | -O5  | 86.93 (18)   |
| C10 | -C11 | -C12 | -C13 | -26.0 (2)    |
| O5  | -C12 | -C13 | -C14 | -96.7 (2)    |
| C11 | -C12 | -C13 | -C14 | 20.9 (3)     |
| C12 | -C13 | -C14 | -C10 | -7.1 (3)     |

**Table S17** - Contact Distances (Angstrom) for: **11 $\beta$**  P 1 21 1 R = 0.04

|    |        |             |     |        |           |
|----|--------|-------------|-----|--------|-----------|
| O1 | .O4_a  | 2.754 (2)   | O3  | .H4    | 2.7600    |
| O1 | .C14_a | 3.343 (3)   | O3  | .H5    | 2.7800    |
| O1 | .C12_b | 3.397 (3)   | O4  | .H11_g | 2.6600    |
| O2 | .C6_b  | 2.978 (3)   | O4  | .H8    | 2.8200    |
| O2 | .C2_b  | 3.220 (2)   | O4  | .H13_d | 2.8200    |
| O2 | .N3_b  | 3.252 (2)   | O5  | .H8_h  | 2.7100    |
| O2 | .O5_d  | 2.798 (2)   | O5  | .H9A   | 2.8400    |
| O2 | .C5_b  | 3.134 (3)   | O5  | .H4    | 2.4500    |
| O2 | .N1_b  | 3.046 (2)   | O5  | .H9A_i | 2.7900    |
| O2 | .C4_b  | 3.214 (2)   | O5  | .H9B_i | 2.9100    |
| O3 | .O5    | 2.752 (2)   | N1  | .O2_e  | 3.046 (2) |
| O3 | .O4    | 3.1930 (19) | N1  | .O3_b  | 2.903 (2) |
| O3 | .N1_e  | 2.903 (2)   | N3  | .O2_e  | 3.252 (2) |
| O4 | .O1_f  | 2.754 (2)   | N1  | .H7C_d | 2.7900    |
| O4 | .O3    | 3.1930 (19) | C2  | .O2_e  | 3.220 (2) |
| O5 | .C9_i  | 3.288 (3)   | C4  | .O5    | 3.295 (2) |
| O5 | .C9    | 3.288 (2)   | C4  | .O2_e  | 3.214 (2) |
| O5 | .C4    | 3.295 (2)   | C5  | .O2_e  | 3.134 (3) |
| O5 | .O2_h  | 2.798 (2)   | C6  | .O2_e  | 2.978 (3) |
| O5 | .O3    | 2.752 (2)   | C9  | .O5    | 3.288 (2) |
| O1 | .H4A_a | 1.9200      | C9  | .O5_j  | 3.288 (3) |
| O1 | .H7A   | 2.4400      | C12 | .O1_e  | 3.397 (3) |
| O1 | .H12_b | 2.7400      | C14 | .O1_f  | 3.343 (3) |
| O1 | .H7B_c | 2.9200      | C2  | .H7C_d | 3.0700    |
| O2 | .H8    | 2.3400      | C2  | .H5_d  | 2.8800    |
| O2 | .H7C_d | 2.9100      | C4  | .H9A   | 2.7100    |
| O2 | .H5_d  | 2.0000      | C4  | .H13_j | 3.0900    |
| O3 | .H1_e  | 2.1500      | C8  | .H5_d  | 3.0900    |
| C9 | .H4    | 2.8400      | H7C | .C2_h  | 3.0700    |
| H1 | .H7C_d | 2.3400      | H7C | .H1_h  | 2.3400    |
| H1 | .O3_b  | 2.1500      | H8  | .O2    | 2.3400    |
| H4 | .O3    | 2.7600      | H8  | .O4    | 2.8200    |

|     |        |        |     |        |        |
|-----|--------|--------|-----|--------|--------|
| H4  | .O5    | 2.4500 | H8  | .O5_d  | 2.7100 |
| H4  | .C9    | 2.8400 | H8  | .H5_d  | 2.3200 |
| H4  | .H5    | 2.4500 | H9A | .O5    | 2.8400 |
| H4  | .H9A   | 2.2700 | H9A | .C4    | 2.7100 |
| H4A | .O1_f  | 1.9200 | H9A | .H4    | 2.2700 |
| H4A | .H11_g | 2.5600 | H9A | .O5_j  | 2.7900 |
| H4A | .H12_g | 2.5300 | H9A | .H9B_i | 2.4800 |
| H5  | .O2_h  | 2.0000 | H9B | .O5_j  | 2.9100 |
| H5  | .O3    | 2.7800 | H9B | .H9A_j | 2.4800 |
| H5  | .C2_h  | 2.8800 | H11 | .O4_l  | 2.6600 |
| H5  | .C8_h  | 3.0900 | H11 | .H4A_l | 2.5600 |
| H5  | .H4    | 2.4500 | H11 | .H12_g | 2.5900 |
| H5  | .H8_h  | 2.3200 | H12 | .O1_e  | 2.7400 |
| H7A | .O1    | 2.4400 | H12 | .H4A_l | 2.5300 |
| H7B | .O1_k  | 2.9200 | H12 | .H11_l | 2.5900 |
| H7C | .O2_h  | 2.9100 | H13 | .O4_h  | 2.8200 |
| H7C | .N1_h  | 2.7900 | H13 | .C4_i  | 3.0900 |

**Table S18** - Hydrogen Bonds (Angstrom, Deg) for: **11 $\beta$**  P 1 21 1 R = 0.04

|    |        |       |        |        |          |        |       |
|----|--------|-------|--------|--------|----------|--------|-------|
| N1 | -- H1  | .. O3 | 0.8800 | 2.1500 | 2.903(2) | 143.00 | 2_656 |
| O4 | -- H4A | .. O1 | 0.8400 | 1.9200 | 2.754(2) | 171.00 | 1_656 |
| O5 | -- H5  | .. O2 | 0.8400 | 2.0000 | 2.798(2) | 159.00 | 1_545 |
| C4 | -- H4  | .. O5 | 0.9500 | 2.4500 | 3.295(2) | 148.00 | .     |
| C7 | -- H7A | .. O1 | 0.9800 | 2.4400 | 2.873(3) | 107.00 | .     |
| C8 | -- H8  | .. O2 | 1.0000 | 2.3400 | 2.788(2) | 106.00 | .     |

Translation of Symmetry Code to Equiv.Pos

|   |               |                    |
|---|---------------|--------------------|
| a | = [ 1454.00 ] | = -1+x, y, -1+z    |
| b | = [ 2656.00 ] | = 1-x, 1/2+y, 1-z  |
| c | = [ 2556.00 ] | = -x, 1/2+y, 1-z   |
| d | = [ 1565.00 ] | = x, 1+y, z        |
| e | = [ 2646.00 ] | = 1-x, -1/2+y, 1-z |
| f | = [ 1656.00 ] | = 1+x, y, 1+z      |
| g | = [ 2757.00 ] | = 2-x, 1/2+y, 2-z  |
| h | = [ 1545.00 ] | = x, -1+y, z       |
| i | = [ 2647.00 ] | = 1-x, -1/2+y, 2-z |
| j | = [ 2657.00 ] | = 1-x, 1/2+y, 2-z  |
| k | = [ 2546.00 ] | = -x, -1/2+y, 1-z  |
| l | = [ 2747.00 ] | = 2-x, -1/2+y, 2-z |

**Compound tc-T:** The quality of the data is highly affected by the very small size of the crystals and their poor quality. Even after cooling, diffraction remains quite limited and for this reason there is a very large internal agreement index and the low precision on bond distances. Absolute configuration could not be determined.

There are two independent molecules in the asymmetric unit, which differ for the conformation of the two five member rings. Therefore, the possibility of higher symmetry or smaller unit cell dimensions could be safely excluded.

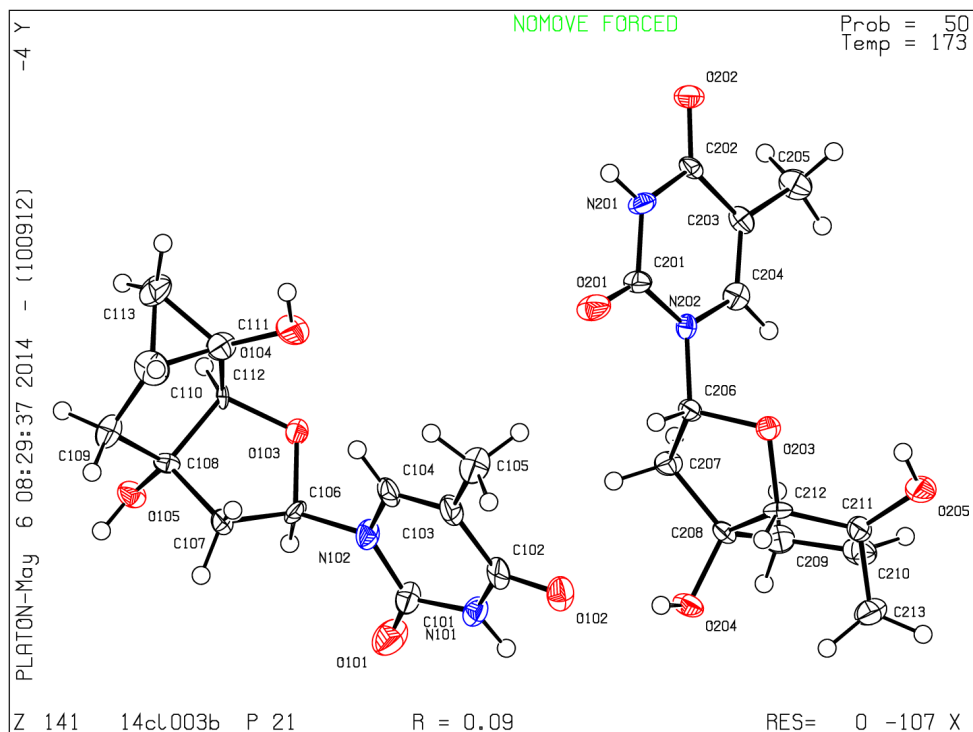

**Figure S19:** ORTEP view of compound **tc-T** with labeling.

**Table S19.** Crystal data and structure refinement for **tc-T**.

|                      |                                                               |                 |
|----------------------|---------------------------------------------------------------|-----------------|
| Identification code  | shelx                                                         |                 |
| Empirical formula    | C <sub>13</sub> H <sub>16</sub> N <sub>2</sub> O <sub>5</sub> |                 |
| Formula weight       | 280.28                                                        |                 |
| Temperature          | 173(2) K                                                      |                 |
| Wavelength           | 0.71073 Å                                                     |                 |
| Crystal system       | Monoclinic                                                    |                 |
| Space group          | P 21                                                          |                 |
| Unit cell dimensions | a = 14.1759(10) Å                                             | α = 90°.        |
|                      | b = 6.0768(4) Å                                               | β = 95.400(6)°. |

|                                   |                                                            |                       |
|-----------------------------------|------------------------------------------------------------|-----------------------|
|                                   | $c = 14.6965(9) \text{ \AA}$                               | $\gamma = 90^\circ$ . |
| Volume                            | 1260.40(14) $\text{\AA}^3$                                 |                       |
| Z                                 | 4                                                          |                       |
| Density (calculated)              | 1.477 $\text{Mg/m}^3$                                      |                       |
| Absorption coefficient            | 0.115 $\text{mm}^{-1}$                                     |                       |
| F(000)                            | 592                                                        |                       |
| Crystal size                      | 0.1217 x 0.0319 x 0.0281 $\text{mm}^3$                     |                       |
| Theta range for data collection   | 1.908 to 25.023°.                                          |                       |
| Index ranges                      | $-16 \leq h \leq 16, -7 \leq k \leq 7, -17 \leq l \leq 17$ |                       |
| Reflections collected             | 10070                                                      |                       |
| Independent reflections           | 4366 [R(int) = 0.0703]                                     |                       |
| Completeness to theta = 25.000°   | 99.9 %                                                     |                       |
| Absorption correction             | Semi-empirical from equivalents                            |                       |
| Max. and min. transmission        | 1 and 0.80897                                              |                       |
| Refinement method                 | Full-matrix least-squares on F <sup>2</sup>                |                       |
| Data / restraints / parameters    | 4366 / 1 / 364                                             |                       |
| Goodness-of-fit on F <sup>2</sup> | 1.085                                                      |                       |
| Final R indices [I > 2sigma(I)]   | R1 = 0.0918, wR2 = 0.2292                                  |                       |
| R indices (all data)              | R1 = 0.1179, wR2 = 0.2493                                  |                       |
| Absolute structure parameter      | 0.0(10)                                                    |                       |
| Extinction coefficient            | 0.046(9)                                                   |                       |
| Largest diff. peak and hole       | 0.620 and -0.425 $\text{e.\AA}^{-3}$                       |                       |

**Table S20.** Atomic coordinates ( $\times 10^4$ ) and equivalent isotropic displacement parameters ( $\text{\AA}^2 \times 10^3$ ) for **tc-T**. U(eq) is defined as one third of the trace of the orthogonalized  $U^{ij}$  tensor.

|        | x       | y         | z        | U(eq) |
|--------|---------|-----------|----------|-------|
| C(101) | 6145(7) | 8007(18)  | 6889(7)  | 26(2) |
| C(102) | 4939(7) | 10441(17) | 6111(7)  | 23(2) |
| C(103) | 4957(7) | 11776(18) | 6907(7)  | 25(2) |
| C(104) | 5519(7) | 11163(17) | 7644(7)  | 23(2) |
| C(105) | 4337(8) | 13789(17) | 6893(7)  | 30(3) |
| C(106) | 6720(7) | 8822(19)  | 8479(6)  | 22(2) |
| C(107) | 7465(7) | 10601(18) | 8722(6)  | 21(2) |
| C(108) | 7667(7) | 10350(16) | 9746(6)  | 16(2) |
| C(109) | 7972(8) | 12469(18) | 10226(7) | 29(3) |

|        |         |           |          |       |
|--------|---------|-----------|----------|-------|
| C(110) | 7060(8) | 13619(19) | 10350(8) | 33(3) |
| C(111) | 6270(8) | 12015(18) | 10229(7) | 25(2) |
| C(113) | 6548(8) | 12910(20) | 11159(7) | 35(3) |
| C(201) | 1551(7) | 11467(17) | 7693(7)  | 22(2) |
| C(202) | 321(6)  | 9907(16)  | 8576(6)  | 18(2) |
| C(203) | 217(7)  | 8085(16)  | 7921(7)  | 18(2) |
| C(204) | 770(7)  | 8074(17)  | 7231(7)  | 22(2) |
| C(205) | -495(8) | 6307(18)  | 8074(7)  | 29(3) |
| C(206) | 1923(6) | 9628(16)  | 6296(6)  | 16(2) |
| C(207) | 2581(7) | 7674(17)  | 6207(6)  | 21(2) |
| C(209) | 2049(8) | 4804(17)  | 4994(7)  | 26(2) |
| C(210) | 1282(8) | 5063(18)  | 4221(7)  | 30(3) |
| C(211) | 1036(7) | 7460(17)  | 4128(6)  | 22(2) |
| C(212) | 1704(7) | 8722(16)  | 4771(6)  | 18(2) |
| C(213) | 1507(9) | 6340(20)  | 3392(7)  | 33(3) |
| C(208) | 2474(6) | 7084(16)  | 5188(6)  | 16(2) |
| C(112) | 6677(6) | 9766(16)  | 10033(6) | 18(2) |
| N(101) | 5508(6) | 8618(15)  | 6160(5)  | 24(2) |
| N(102) | 6095(6) | 9269(14)  | 7647(5)  | 23(2) |
| N(201) | 995(6)  | 11413(14) | 8417(5)  | 21(2) |
| N(202) | 1415(5) | 9672(13)  | 7120(5)  | 16(2) |
| O(101) | 6658(6) | 6425(14)  | 6859(5)  | 40(2) |
| O(102) | 4414(5) | 10805(13) | 5389(5)  | 30(2) |
| O(103) | 6183(4) | 8715(12)  | 9252(4)  | 21(2) |
| O(104) | 5397(5) | 12571(13) | 9764(5)  | 33(2) |
| O(105) | 8315(5) | 8552(12)  | 9951(4)  | 23(2) |
| O(201) | 2109(5) | 12976(12) | 7590(5)  | 31(2) |
| O(202) | -133(5) | 10169(11) | 9238(5)  | 25(2) |
| O(203) | 1234(4) | 9519(11)  | 5531(4)  | 19(2) |
| O(204) | 3321(5) | 7165(12)  | 4759(5)  | 25(2) |
| O(205) | 107(5)  | 8210(14)  | 3936(5)  | 30(2) |

---

**Table S21.** Bond lengths [ $\text{\AA}$ ] and angles [ $^\circ$ ] for **tc-T**.

---

|               |           |
|---------------|-----------|
| C(101)-O(101) | 1.209(13) |
| C(101)-N(102) | 1.360(13) |
| C(101)-N(101) | 1.385(13) |

|               |           |
|---------------|-----------|
| C(102)-O(102) | 1.257(12) |
| C(102)-N(101) | 1.367(14) |
| C(102)-C(103) | 1.423(15) |
| C(103)-C(104) | 1.335(14) |
| C(103)-C(105) | 1.506(14) |
| C(104)-N(102) | 1.411(13) |
| C(106)-O(103) | 1.427(11) |
| C(106)-N(102) | 1.466(12) |
| C(106)-C(107) | 1.531(14) |
| C(107)-C(108) | 1.512(12) |
| C(108)-O(105) | 1.440(11) |
| C(108)-C(109) | 1.512(14) |
| C(108)-C(112) | 1.545(13) |
| C(109)-C(110) | 1.497(16) |
| C(110)-C(111) | 1.482(16) |
| C(110)-C(113) | 1.513(16) |
| C(111)-O(104) | 1.397(12) |
| C(111)-C(113) | 1.489(14) |
| C(111)-C(112) | 1.521(14) |
| C(201)-O(201) | 1.230(12) |
| C(201)-N(202) | 1.380(13) |
| C(201)-N(201) | 1.382(12) |
| C(202)-O(202) | 1.227(11) |
| C(202)-N(201) | 1.359(12) |
| C(202)-C(203) | 1.465(14) |
| C(203)-C(204) | 1.338(13) |
| C(203)-C(205) | 1.510(14) |
| C(204)-N(202) | 1.354(12) |
| C(206)-O(203) | 1.419(11) |
| C(206)-N(202) | 1.467(12) |
| C(206)-C(207) | 1.523(13) |
| C(207)-C(208) | 1.533(13) |
| C(209)-C(210) | 1.505(16) |
| C(209)-C(208) | 1.527(14) |
| C(210)-C(211) | 1.501(15) |
| C(210)-C(213) | 1.505(15) |
| C(211)-O(205) | 1.398(12) |
| C(211)-C(213) | 1.486(14) |

|                      |           |
|----------------------|-----------|
| C(211)-C(212)        | 1.486(13) |
| C(212)-O(203)        | 1.438(10) |
| C(212)-C(208)        | 1.560(13) |
| C(208)-O(204)        | 1.409(11) |
| C(112)-O(103)        | 1.436(11) |
| O(101)-C(101)-N(102) | 123.8(9)  |
| O(101)-C(101)-N(101) | 122.4(9)  |
| N(102)-C(101)-N(101) | 113.7(9)  |
| O(102)-C(102)-N(101) | 119.2(10) |
| O(102)-C(102)-C(103) | 123.8(10) |
| N(101)-C(102)-C(103) | 116.9(9)  |
| C(104)-C(103)-C(102) | 118.1(10) |
| C(104)-C(103)-C(105) | 122.7(10) |
| C(102)-C(103)-C(105) | 119.1(9)  |
| C(103)-C(104)-N(102) | 122.1(10) |
| O(103)-C(106)-N(102) | 110.3(7)  |
| O(103)-C(106)-C(107) | 104.7(7)  |
| N(102)-C(106)-C(107) | 114.4(8)  |
| C(108)-C(107)-C(106) | 102.9(8)  |
| O(105)-C(108)-C(107) | 110.0(8)  |
| O(105)-C(108)-C(109) | 113.6(8)  |
| C(107)-C(108)-C(109) | 113.4(8)  |
| O(105)-C(108)-C(112) | 110.3(8)  |
| C(107)-C(108)-C(112) | 101.7(8)  |
| C(109)-C(108)-C(112) | 107.2(8)  |
| C(110)-C(109)-C(108) | 104.0(9)  |
| C(111)-C(110)-C(109) | 109.3(9)  |
| C(111)-C(110)-C(113) | 59.6(7)   |
| C(109)-C(110)-C(113) | 116.5(10) |
| O(104)-C(111)-C(110) | 121.6(9)  |
| O(104)-C(111)-C(113) | 120.4(9)  |
| C(110)-C(111)-C(113) | 61.2(8)   |
| O(104)-C(111)-C(112) | 117.3(9)  |
| C(110)-C(111)-C(112) | 108.5(8)  |
| C(113)-C(111)-C(112) | 115.4(9)  |
| C(111)-C(113)-C(110) | 59.2(7)   |
| O(201)-C(201)-N(202) | 124.6(8)  |



|                      |           |
|----------------------|-----------|
| O(201)-C(201)-N(201) | 122.2(9)  |
| N(202)-C(201)-N(201) | 113.2(9)  |
| O(202)-C(202)-N(201) | 118.6(9)  |
| O(202)-C(202)-C(203) | 126.3(9)  |
| N(201)-C(202)-C(203) | 115.1(8)  |
| C(204)-C(203)-C(202) | 118.1(9)  |
| C(204)-C(203)-C(205) | 123.8(9)  |
| C(202)-C(203)-C(205) | 118.1(8)  |
| C(203)-C(204)-N(202) | 122.5(9)  |
| O(203)-C(206)-N(202) | 107.4(7)  |
| O(203)-C(206)-C(207) | 106.1(7)  |
| N(202)-C(206)-C(207) | 115.9(8)  |
| C(206)-C(207)-C(208) | 105.1(7)  |
| C(210)-C(209)-C(208) | 106.9(8)  |
| C(211)-C(210)-C(213) | 59.3(7)   |
| C(211)-C(210)-C(209) | 108.4(9)  |
| C(213)-C(210)-C(209) | 118.2(10) |
| O(205)-C(211)-C(213) | 118.8(8)  |
| O(205)-C(211)-C(212) | 119.4(8)  |
| C(213)-C(211)-C(212) | 113.3(8)  |
| O(205)-C(211)-C(210) | 122.8(9)  |
| C(213)-C(211)-C(210) | 60.5(7)   |
| C(212)-C(211)-C(210) | 108.3(8)  |
| O(203)-C(212)-C(211) | 110.8(7)  |
| O(203)-C(212)-C(208) | 105.5(7)  |
| C(211)-C(212)-C(208) | 107.5(8)  |
| C(211)-C(213)-C(210) | 60.2(7)   |
| O(204)-C(208)-C(209) | 106.6(8)  |
| O(204)-C(208)-C(207) | 114.8(8)  |
| C(209)-C(208)-C(207) | 113.3(8)  |
| O(204)-C(208)-C(212) | 113.4(7)  |
| C(209)-C(208)-C(212) | 104.8(7)  |
| C(207)-C(208)-C(212) | 103.7(7)  |
| O(103)-C(112)-C(111) | 112.7(8)  |
| O(103)-C(112)-C(108) | 105.7(7)  |
| C(111)-C(112)-C(108) | 102.5(8)  |
| C(102)-N(101)-C(101) | 126.6(9)  |
| C(101)-N(102)-C(104) | 122.1(8)  |

|                      |          |
|----------------------|----------|
| C(101)-N(102)-C(106) | 120.3(8) |
| C(104)-N(102)-C(106) | 117.3(8) |
| C(202)-N(201)-C(201) | 127.5(9) |
| C(204)-N(202)-C(201) | 123.4(8) |
| C(204)-N(202)-C(206) | 118.4(8) |
| C(201)-N(202)-C(206) | 117.8(8) |
| C(106)-O(103)-C(112) | 111.1(7) |
| C(206)-O(203)-C(212) | 107.2(7) |

---

Symmetry transformations used to generate equivalent atoms:

**Table S22.** Anisotropic displacement parameters ( $\text{\AA}^2 \times 10^3$ ) for **tc-T**. The anisotropic displacement factor exponent takes the form:  $-2\pi^2 [ h^2 a^{*2} U^{11} + \dots + 2 h k a^* b^* U^{12} ]$

|        | U <sup>11</sup> | U <sup>22</sup> | U <sup>33</sup> | U <sup>23</sup> | U <sup>13</sup> | U <sup>12</sup> |
|--------|-----------------|-----------------|-----------------|-----------------|-----------------|-----------------|
| C(101) | 27(6)           | 25(6)           | 25(5)           | -4(5)           | -5(4)           | 0(5)            |
| C(102) | 20(5)           | 22(5)           | 26(5)           | 7(5)            | 0(4)            | -16(5)          |
| C(103) | 15(5)           | 31(6)           | 29(5)           | 1(5)            | -3(4)           | 2(5)            |
| C(104) | 14(5)           | 27(6)           | 27(5)           | 3(5)            | 1(4)            | -8(5)           |
| C(105) | 36(6)           | 21(6)           | 32(6)           | -3(5)           | -6(5)           | 6(5)            |
| C(106) | 20(5)           | 37(6)           | 9(4)            | -6(4)           | -4(4)           | 7(5)            |
| C(107) | 14(5)           | 36(6)           | 12(4)           | 11(4)           | -2(4)           | 0(5)            |
| C(108) | 17(5)           | 16(5)           | 16(5)           | 3(4)            | 6(4)            | 2(4)            |
| C(109) | 33(6)           | 27(6)           | 25(5)           | -6(5)           | -5(5)           | -3(5)           |
| C(110) | 35(6)           | 21(6)           | 45(7)           | -2(5)           | 8(5)            | -6(5)           |
| C(111) | 27(6)           | 26(6)           | 23(5)           | 0(4)            | 1(4)            | 7(5)            |
| C(113) | 40(7)           | 35(6)           | 31(6)           | -18(5)          | 1(5)            | 1(6)            |
| C(201) | 21(5)           | 24(6)           | 20(5)           | -3(4)           | 6(4)            | 3(5)            |
| C(202) | 12(5)           | 29(6)           | 14(5)           | 10(4)           | 3(4)            | 1(4)            |
| C(203) | 16(5)           | 12(5)           | 27(5)           | 3(4)            | 3(4)            | -2(4)           |
| C(204) | 23(5)           | 20(5)           | 22(5)           | 1(4)            | 1(4)            | 1(5)            |
| C(205) | 29(6)           | 25(6)           | 33(6)           | 5(5)            | 8(5)            | -4(5)           |
| C(206) | 14(5)           | 19(5)           | 17(5)           | 1(4)            | 3(4)            | 0(4)            |
| C(207) | 20(5)           | 23(5)           | 20(5)           | 1(4)            | 2(4)            | 10(5)           |
| C(209) | 27(6)           | 19(5)           | 32(6)           | -8(4)           | 4(5)            | 6(5)            |
| C(210) | 30(6)           | 27(6)           | 35(6)           | -3(5)           | 13(5)           | -8(5)           |

|        |       |       |       |        |       |        |
|--------|-------|-------|-------|--------|-------|--------|
| C(211) | 17(5) | 32(6) | 16(5) | 6(4)   | 0(4)  | 2(5)   |
| C(212) | 22(5) | 17(5) | 15(4) | -1(4)  | 10(4) | 2(4)   |
| C(213) | 36(6) | 39(7) | 24(6) | -10(5) | 8(5)  | -6(6)  |
| C(208) | 11(5) | 19(5) | 18(5) | 5(4)   | 3(4)  | 2(4)   |
| C(112) | 10(5) | 24(5) | 19(5) | -7(4)  | -4(4) | -8(4)  |
| N(101) | 28(5) | 23(4) | 20(4) | -3(4)  | -1(4) | -7(4)  |
| N(102) | 21(4) | 26(5) | 20(4) | 2(4)   | -6(3) | 4(4)   |
| N(201) | 25(5) | 22(4) | 16(4) | -5(3)  | 6(3)  | -1(4)  |
| N(202) | 16(4) | 14(4) | 17(4) | -1(3)  | -1(3) | -3(4)  |
| O(101) | 48(5) | 39(5) | 32(4) | -8(4)  | -4(4) | 12(5)  |
| O(102) | 28(4) | 35(4) | 25(4) | 9(3)   | -3(3) | -8(4)  |
| O(103) | 19(3) | 28(4) | 16(3) | 0(3)   | 0(3)  | -5(3)  |
| O(104) | 23(4) | 43(5) | 33(4) | 0(4)   | 1(3)  | 20(4)  |
| O(105) | 19(4) | 29(4) | 23(3) | 7(3)   | 3(3)  | 4(3)   |
| O(201) | 38(4) | 27(4) | 29(4) | -12(3) | 14(3) | -14(4) |
| O(202) | 25(4) | 28(4) | 23(4) | -5(3)  | 10(3) | -4(3)  |
| O(203) | 17(3) | 23(3) | 16(3) | 1(3)   | 0(3)  | 6(3)   |
| O(204) | 20(4) | 25(4) | 30(4) | -2(3)  | 12(3) | -4(3)  |
| O(205) | 24(4) | 40(5) | 28(4) | -7(3)  | 3(3)  | 12(4)  |

---

### Oligonucleotide Synthesis.

Syntheses of oligonucleotides were performed on the 1.3  $\mu\text{mol}$  scale of a DNA synthesizer using standard solid-phase phosphoramidite chemistry. Oligomers were assembled using the manufacturer's protocols on nucleoside preloaded dA-CPG 500 (48  $\mu\text{mol/g}$ ). Natural phosphoramidites (dT, dC4Bz, dA6Bz, dG2dmf) were coupled as a 0.1 M solution in  $\text{CH}_3\text{CN}$ , iso-tricyclo- and bicyclophosphoramidites **10** and **13** as 0.15 M solution in  $\text{CH}_3\text{CN}$ . The coupling step was 90 s for natural phosphoramidites. An extended coupling step of 7 min for amidites **10** and **13** and 12 min for the **tc-T** phosphoramidite was necessary to achieve >95% coupling efficiency (trityl assay). As a coupling reagent, 5-(ethylthio)-1*H*-tetrazole (0.25 M in  $\text{CH}_3\text{CN}$ ) was used. Capping was performed with a solution of DMAP (0.5 M in  $\text{CH}_3\text{CN}$ , Cap A) and a solution of 25%  $\text{Ac}_2\text{O}$  and 12.5% sym-collidine in  $\text{CH}_3\text{CN}$  (Cap B). Oxidation was performed with a solution of 20 mM  $\text{I}_2$  and 0.45 M sym-collidine in 2.1:1  $\text{CH}_3\text{CN}/\text{H}_2\text{O}$ . In order to achieve the full length sequence of oligonucleotide **ON4**, oxidation was performed using 1.1 M *tert*-butyl hydroperoxide in  $\text{CH}_2\text{Cl}_2$  (0.8 min). Detritylation after coupling of phosphoramidites was carried out using a solution of 3% dichloroacetic acid in dichloroethane.

### Oligonucleotide Deprotection and Purification.

Deprotection of the oligonucleotides and detachment from the solid support was carried out using standard conditions (concd aq  $\text{NH}_3$  for 16 h at 55  $^\circ\text{C}$ ). The solutions were centrifuged after deprotection, the supernatants were collected and the remaining beads washed with 2 $\times$ 0.5 mL of  $\text{H}_2\text{O}$ . The combined supernatants were then concentrated to dryness. Crude oligomers were purified by ion-exchange HPLC (Dionex DNA Pac-PA200 or DNA Pac-PA100). As mobile phases, the following buffers were prepared: (A) 25 mM Trizma (2-amino-2-hydroxymethyl-1,3-propanediol) in  $\text{H}_2\text{O}$ , pH 8.0; (B) 25 mM Trizma, 1.25 M NaCl in  $\text{H}_2\text{O}$ , pH 8.0. Linear gradients of B in A were used (typically 0 to 50% B in A over 30 min), with a 1 mL/min flow rate and detection at 260 nm. Purified oligonucleotides were desalted over Sep-Pak cartridges, quantified at 260 nm with a Nanodrop spectrophotometer, and analyzed by  $\text{ESI}^-$  mass spectrometry. Oligonucleotides **ON6** and **ON7**, which were synthesized as DMT-on, were after abovementioned purification and desalting lyophilized and detritylated by treatment with 300  $\mu\text{L}$  80% AcOH for 45 min at RT. These solutions were subsequently diluted with 300  $\mu\text{L}$  of  $\text{H}_2\text{O}$  and extracted with  $\text{Et}_2\text{O}$  (3 $\times$ 300  $\mu\text{L}$ ). Aqueous layer was further diafiltered (Centrifugal Filters Amicon Ultra 0.5 mL, Ultracel – 3K, MWCO 3 kDa) against water until neutral pH. All solutions of oligonucleotides in  $\text{H}_2\text{O}$  were then stored at  $-18\text{ }^\circ\text{C}$ .

### UV–Melting Curves.

UV–melting curves were recorded on a Varian Cary Bio100 UV/vis spectrophotometer. Absorbances were monitored at 260 nm, and the heating rate was set to 0.5  $^\circ\text{C}/\text{min}$ . A cooling–heating–cooling cycle in the temperature range 20–70  $^\circ\text{C}$  was applied.  $T_m$  values were obtained from the maximum of the first derivative curves and reported as the average of at least three ramps ( $\pm 1\text{ }^\circ\text{C}$  error). All measurements were carried out in NaCl (150 mM),  $\text{NaH}_2\text{PO}_4$  (10 mM) buffer at pH 7.0 with a duplex concentration of 1.2  $\mu\text{M}$ .

**Table S23.** ESI-MS and HPLC characterization of modified oligonucleotides **ON1-7**

| Entry      | m/z calc | m/z found | t <sub>r</sub> (min) | Conditions                                               | HPLC-purity |
|------------|----------|-----------|----------------------|----------------------------------------------------------|-------------|
| <b>ON1</b> | 3700.4   | 3700.6    | 22.6                 | Buffer A: 25 mM Trizma in H <sub>2</sub> O, pH 8         | 87%         |
| <b>ON2</b> | 3724.5   | 3724.4    | 22.6                 | Buffer B: 25 mM Trizma, 1.25 M NaCl in H <sub>2</sub> O, | 90%         |
| <b>ON3</b> | 3724.5   | 3724.4    | 22.4                 | pH 8                                                     | 93%         |
| <b>ON4</b> | 3714.5   | 3714.6    | 22.4                 | Dionex DNA-Pac PA200, 0-50 % B in 30 min                 | 89%         |
| <b>ON5</b> | 3714.5   | 3714.6    | 22.5                 | Buffer A: 10 mM NaOH in H <sub>2</sub> O, pH 12          | ---         |
| <b>ON6</b> | 3752.5   | 3752.6    | 22.1                 | Buffer B: 10 mM NaOH, 1.5 M NaCl in H <sub>2</sub> O, pH | ---         |
| <b>ON7</b> | 3752.5   | 3752.7    | 22.1                 | 12<br>Dionex DNA-Pac PA200, 0-50 % B in 30 min           | ---         |

ON1

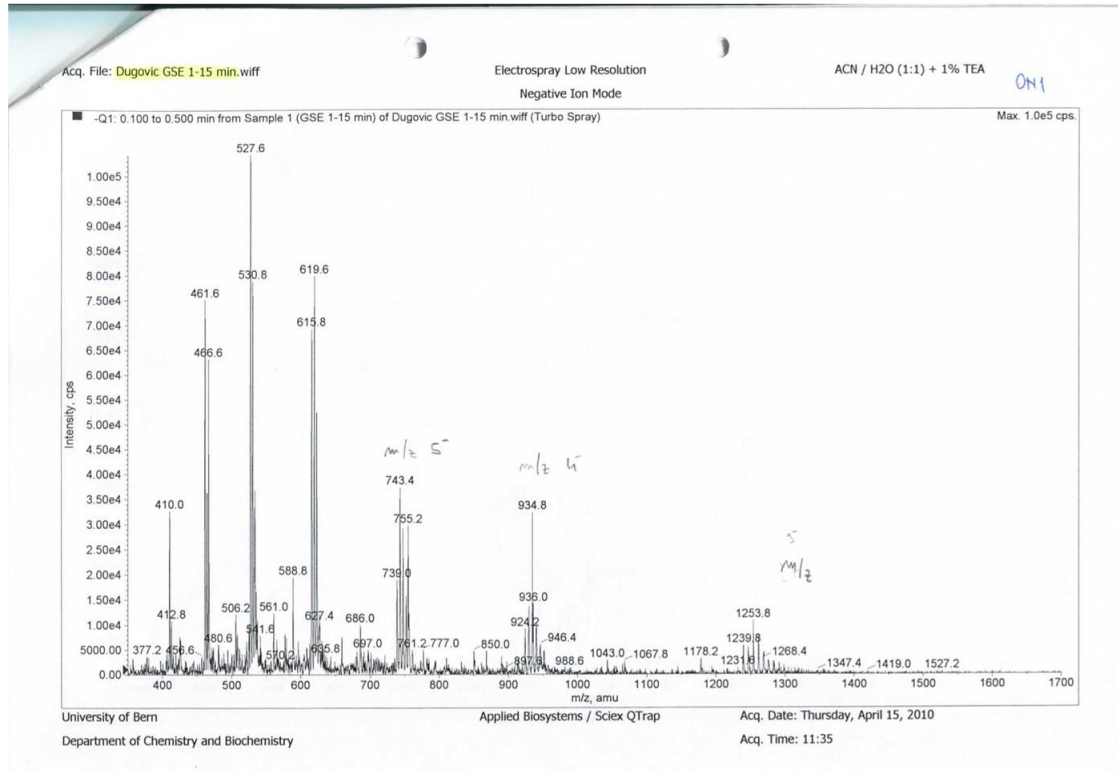

Acq. File: n/a Electropray Low Resolution Negative Ion Mode ACN / H<sub>2</sub>O (1:1) + 1% TEA

Dataset Name: -Q1: 0.100 to 0.500 min from Sample 1 (GSE 1-15 min) of Dugovic GSE 1-15 min.wiff (Turbo Spray)

Analysis Results

| # | Mass (avg.) | m/z      | z  | Area       | +/-     | Apex Mass | Area      | Evidence |
|---|-------------|----------|----|------------|---------|-----------|-----------|----------|
| 1 | 3700.6046   | 410.1504 | -9 | 152737.78  | -0.0205 | 3700.6581 | 1506015.8 | C        |
|   |             | 461.5606 | -8 | 346733.53  | -0.0075 |           |           |          |
|   |             | 527.6580 | -7 | 503227.12  | 0.0076  |           |           |          |
|   |             | 615.7912 | -6 | 358442.03  | 0.0312  |           |           |          |
|   |             | 739.0614 | -5 | 96918.9297 | -0.0521 |           |           |          |
|   |             | 924.0405 | -4 | 47956.4375 | -0.1032 |           |           |          |
| 2 | 3722.7711   | 412.7083 | -9 | 52692.9766 | 0.0745  | 3722.8630 | 1208203.2 | C        |
|   |             | 464.3528 | -8 | 155716.04  | 0.0139  |           |           |          |
|   |             | 530.8301 | -7 | 386223.18  | 0.0131  |           |           |          |
|   |             | 619.4428 | -6 | 341376.34  | -0.0116 |           |           |          |
|   |             | 743.5231 | -5 | 195747.26  | -0.0237 |           |           |          |
|   |             | 929.5511 | -4 | 76447.4375 | -0.1343 |           |           |          |
| 3 | 3743.7892   | 415.0649 | -9 | 17200.1426 | 0.0957  | 3744.2500 | 829107.26 | C        |
|   |             | 466.8518 | -8 | 170048.98  | -0.1144 |           |           |          |
|   |             | 533.8320 | -7 | 206255.82  | 0.0124  |           |           |          |
|   |             | 623.0342 | -6 | 212756.96  | 0.0768  |           |           |          |
|   |             | 747.8260 | -5 | 132430.01  | 0.0756  |           |           |          |
|   |             | 934.8704 | -4 | 90415.3281 | -0.0695 |           |           |          |

University of Bern Applied Biosystems / Sciex QTrap Acq. Date: n/a  
Department of Chemistry and Biochemistry Acq. Time: n/a

ON2

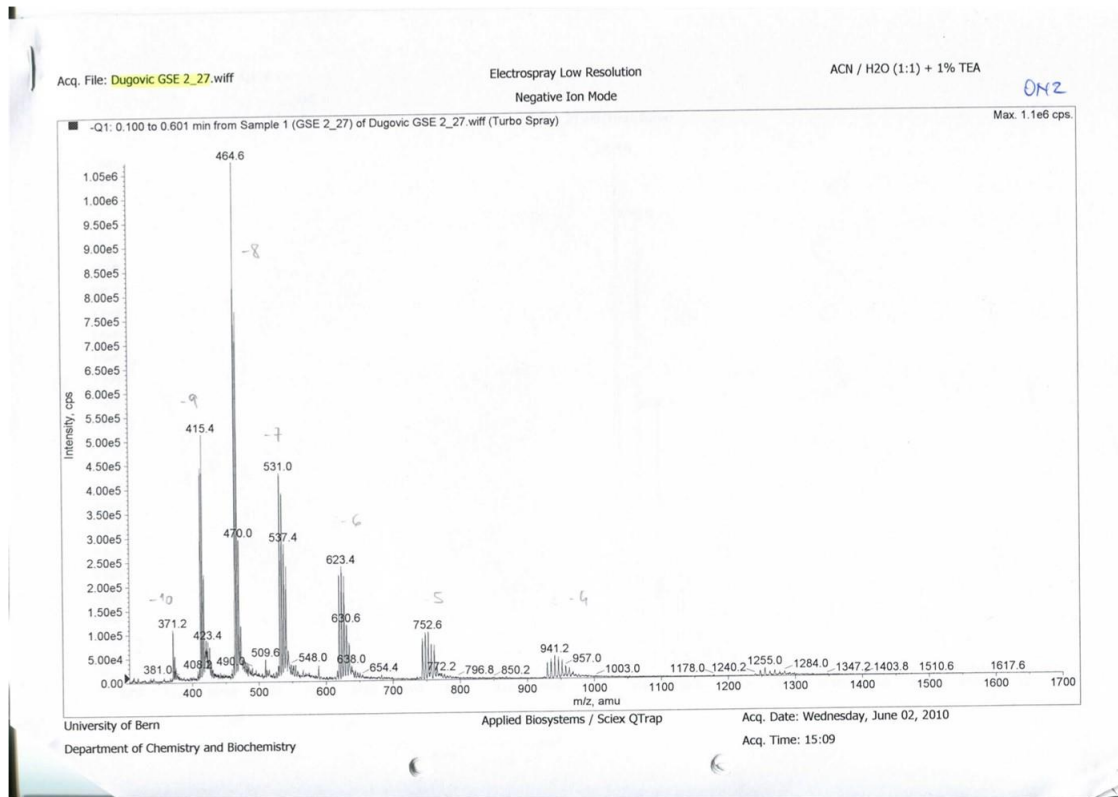

Acq. File: n/a

Electrospray Low Resolution  
Negative Ion Mode

ACN / H2O (1:1) + 1% TEA

Dataset Name: -Q1: 0.100 to 0.601 min from Sample 1 (GSE\_2\_27) of Dugovic GSE\_2\_27.wiff (Turbo Spray)

Analysis Results

| #        | Mass (avg.) | m/z      | Z         | Area      | +/-     | Apex Mass | Area        | Evidence  |           |   |
|----------|-------------|----------|-----------|-----------|---------|-----------|-------------|-----------|-----------|---|
| 1        | 3724.4116   | 371.4135 | -10       | 406437.68 | -0.0202 | 3724.3495 | 11181023... | C         |           |   |
|          |             | 412.8394 | -9        | 2212810.5 | -0.0233 |           |             |           |           |   |
|          |             | 464.5363 | -8        | 4589628.5 | -0.0078 |           |             |           |           |   |
|          |             | 531.0537 | -7        | 2231224.5 | 0.0023  |           |             |           |           |   |
|          |             | 619.7095 | -6        | 1098304.3 | -0.0183 |           |             |           |           |   |
|          |             | 743.9055 | -5        | 461537.78 | 0.0306  |           |             |           |           |   |
|          |             | 929.9800 | -4        | 181080.39 | -0.1155 |           |             |           |           |   |
|          |             | 2        | 3746.4456 | 373.6485  | -10     | 191537.70 | 0.0113      | 3746.3282 | 9514602.0 | C |
|          |             |          |           | 415.2745  | -9      | 1808198.2 | 0.0102      |           |           |   |
|          |             |          |           | 467.2836  | -8      | 3582552.5 | -0.0147     |           |           |   |
| 534.2224 | -7          |          |           | 1876631.8 | 0.0233  |           |             |           |           |   |
| 623.4140 | -6          |          |           | 1249058.1 | -0.0138 |           |             |           |           |   |
| 748.2537 | -5          |          |           | 592186.93 | -0.0280 |           |             |           |           |   |
| 935.4959 | -4          |          |           | 214436.65 | -0.1081 |           |             |           |           |   |
| 3        | 3767.8742   |          |           | 375.5768  | -10     | 114225.94 | -0.2032     | 3767.8558 | 5898605.2 | C |
|          |             |          |           | 417.5914  | -9      | 897905.68 | -0.0539     |           |           |   |
|          |             |          |           | 469.9745  | -8      | 1503313.0 | -0.0023     |           |           |   |
|          |             | 537.2980 | -7        | 1465355.6 | 0.0377  |           |             |           |           |   |
|          |             | 627.0160 | -6        | 1087575.2 | 0.0444  |           |             |           |           |   |
|          |             | 752.5794 | -5        | 539404.50 | 0.0120  |           |             |           |           |   |
|          |             | 940.9495 | -4        | 290825.28 | -0.0116 |           |             |           |           |   |

University of Bern  
Department of Chemistry and Biochemistry

Applied Biosystems / Sciex QTrap

Acq. Date: n/a  
Acq. Time: n/a

ON3

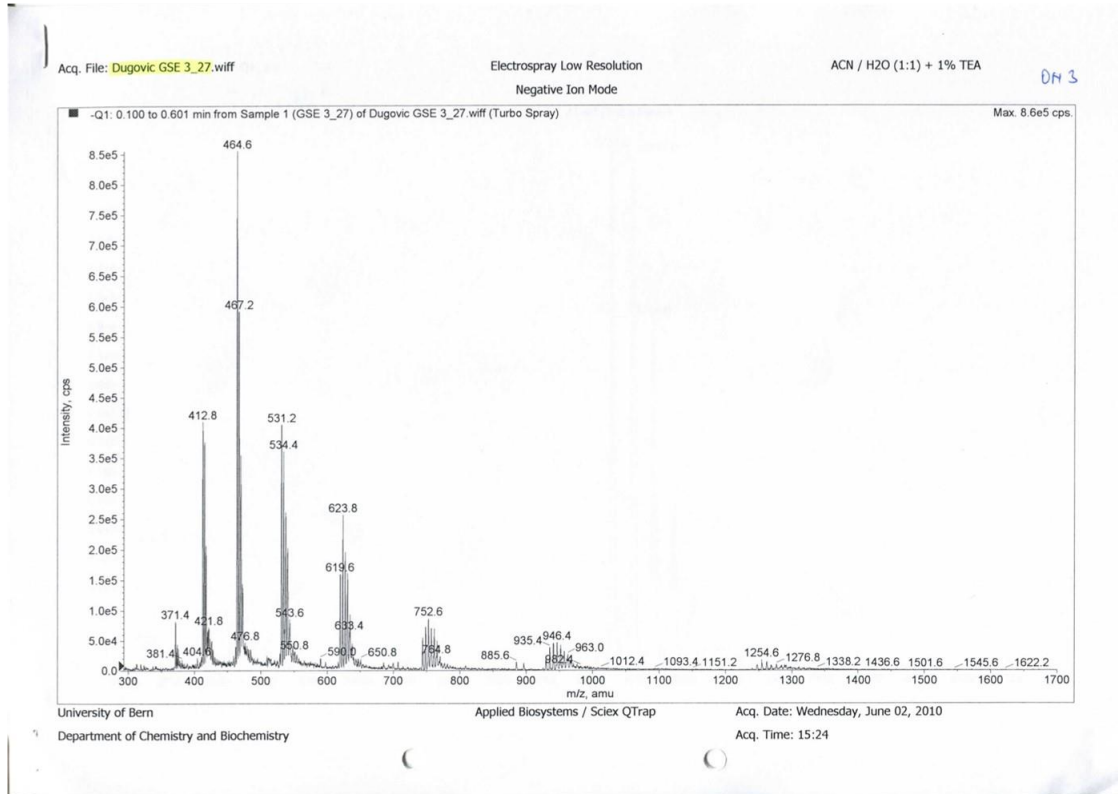

Acq. File: n/a

Electrospray Low Resolution

ACN / H2O (1:1) + 1% TEA

Negative Ion Mode

Dataset Name: Q1: 0.100 to 0.601 min from Sample 1 (GSE 3\_27) of Dugovic GSE 3\_27.wiff (Turbo Spray)

Analysis Results

| # | Mass (avg.) | m/z      | z   | Area      | +/-     | Apex Mass | Area      | Evidence |
|---|-------------|----------|-----|-----------|---------|-----------|-----------|----------|
| 1 | 3724.3984   | 371.4176 | -10 | 335889.96 | -0.0148 | 3724.4112 | 9558867.5 | C        |
|   |             | 412.8089 | -9  | 2008751.2 | -0.0057 |           |           |          |
|   |             | 464.5440 | -8  | 3986916.7 | 0.0016  |           |           |          |
|   |             | 531.0667 | -7  | 1977006.6 | 0.0172  |           |           |          |
|   |             | 619.7244 | -6  | 871151.06 | -0.0012 |           |           |          |
|   |             | 743.8578 | -5  | 261677.60 | -0.0145 |           |           |          |
|   |             | 929.8566 | -4  | 117474.26 | -0.2354 |           |           |          |
| 2 | 3746.5299   | 373.7011 | -10 | 167928.26 | 0.0556  | 3746.2269 | 8342563.0 | C        |
|   |             | 415.3039 | -9  | 1661423.0 | 0.0302  |           |           |          |
|   |             | 467.2709 | -8  | 2957939.5 | -0.0379 |           |           |          |
|   |             | 534.2522 | -7  | 1753576.5 | 0.0411  |           |           |          |
|   |             | 623.4203 | -6  | 1134682.3 | 0.0061  |           |           |          |
|   |             | 748.2772 | -5  | 433132.84 | -0.0213 |           |           |          |
|   |             | 935.4664 | -4  | 233880.57 | -0.1586 |           |           |          |
| 3 | 3767.4685   | 375.5595 | -10 | 108821.96 | -0.1799 | 3767.4625 | 6412650.4 | C        |
|   |             | 417.5286 | -9  | 1066407.6 | -0.0716 |           |           |          |
|   |             | 469.9254 | -8  | 2046674.8 | -0.0008 |           |           |          |
|   |             | 537.2310 | -7  | 1469329.2 | 0.0287  |           |           |          |
|   |             | 626.9644 | -6  | 958665.62 | 0.0604  |           |           |          |
|   |             | 752.5690 | -5  | 497113.34 | 0.0827  |           |           |          |
|   |             | 940.9045 | -4  | 265637.78 | 0.0448  |           |           |          |

University of Bern

Applied Biosystems / Sciex QTrap

Acq. Date: n/a

Department of Chemistry and Biochemistry

Acq. Time: n/a



ON4

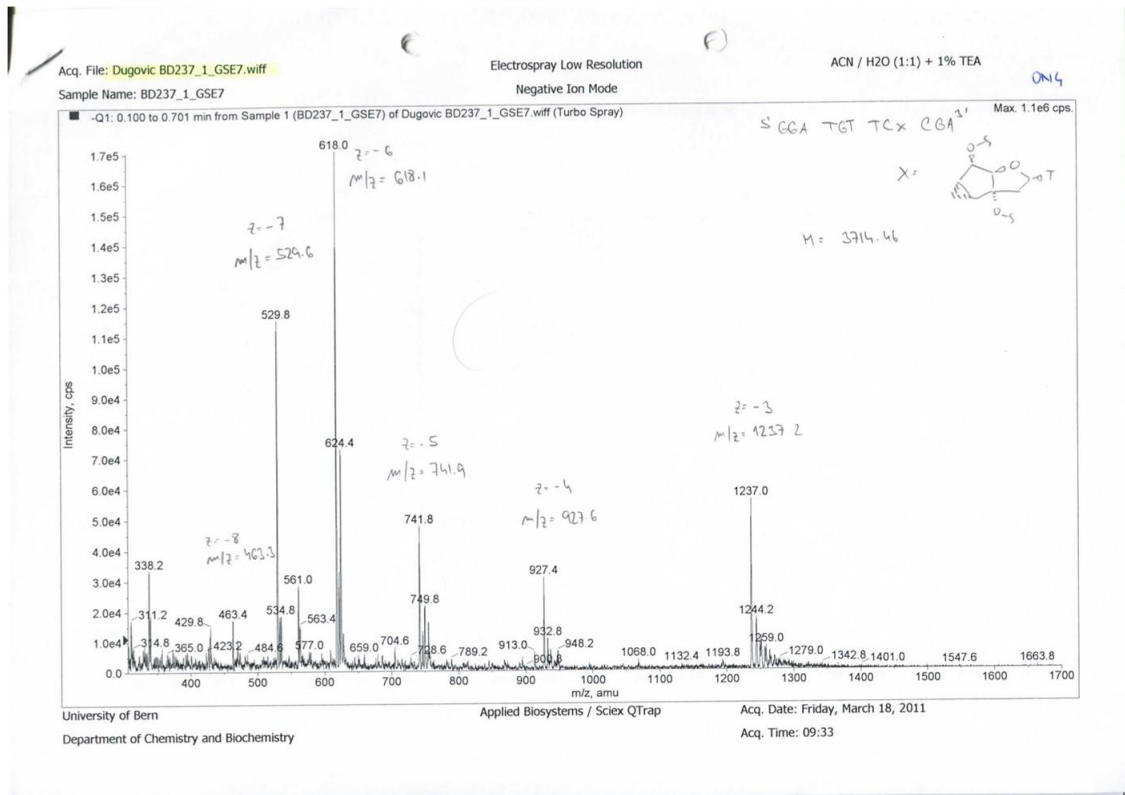

Acq. File: n/a  
Sample Name: n/a  
Electrospray Low Resolution  
Negative Ion Mode  
ACN / H2O (1:1) + 1% TEA

Dataset Name: -Q1: 0.100 to 0.701 min from Sample 1 (BD237\_1\_GSE7) of Dugovic BD237\_1\_GSE7.wiff (Turbo Spray)

Analysis Results

| # | Mass (avg.) | m/z      | z  | Area         | +/-     | Apex Mass | Area         | Evidence |
|---|-------------|----------|----|--------------|---------|-----------|--------------|----------|
| 1 | 3714.5049   |          |    |              |         | 3714.4507 | 1669831.1... | C        |
|   |             | 529.6863 | -7 | 531963.37... | 0.0502  |           |              |          |
|   |             | 618.0677 | -6 | 776530.56... | -0.0090 |           |              |          |
|   |             | 741.8129 | -5 | 216861.75... | -0.0807 |           |              |          |
|   |             | 927.5195 | -4 | 144475.43... | -0.0993 |           |              |          |
| 2 | 3751.8730   |          |    |              |         | 3751.9331 | 485002.60... | C        |
|   |             | 534.9659 | -7 | 70487.8984   | -0.0085 |           |              |          |
|   |             | 624.3148 | -6 | 269635.43... | 0.0100  |           |              |          |
|   |             | 749.3767 | -5 | 102372.42... | 0.0095  |           |              |          |
|   |             | 936.8615 | -4 | 42506.8359   | -0.0993 |           |              |          |
| 3 | 3736.5180   |          |    |              |         | 3736.7343 | 341014.32... | C        |
|   |             | 532.8142 | -7 | 73807.8594   | 0.0333  |           |              |          |
|   |             | 621.7816 | -6 | 158940.18... | 0.0360  |           |              |          |
|   |             | 746.2697 | -5 | 53899.8672   | -0.0265 |           |              |          |
|   |             | 932.9177 | -4 | 54366.4063   | -0.2044 |           |              |          |

University of Bern  
Department of Chemistry and Biochemistry  
Applied Biosystems / Sciex QTrap  
Acq. Date: n/a  
Acq. Time: n/a
